# Supplementary material
Source: PubMed Central journal article supplement (PMC3170427)
Supplement: NIHMS320415-supplement-1_si_001.pdf [file NIHMS320415-supplement-1_si_001.pdf]

## **Total Synthesis of (-)-4,8,10-Tridesmethyl Telithromycin**

Venkata Velvadapu, Tapas Paul, Bharat Wagh, Ian Glassford, Charles DeBrosse and Rodrigo B. Andrade\*

Department of Chemistry, Temple University, Philadelphia, PA 19122

### **Supporting Information**

|                                                                                            |    |
|--------------------------------------------------------------------------------------------|----|
| General Experimental Procedures.....                                                       | S2 |
| <sup>1</sup> H and <sup>13</sup> C NMR for <b>24-25, 28, 30-38, 44-47, 53-55, 57</b> ..... | S5 |

**General.** All reactions containing moisture or air sensitive reagents were performed in oven-dried glassware under nitrogen or Argon. Dimethylformamide, tetrahydrofuran, toluene and dichloromethane were passed through two columns of neutral alumina. Pyridine, 2,6-lutidine, acetone, *i*-Pr<sub>2</sub>NEt and Et<sub>3</sub>N were all distilled from CaH<sub>2</sub> prior to use. Molecular sieves (4Å) were activated by flame drying under vacuum prior to use. AgOTf was azeotroped with dry toluene. Compounds **3**,<sup>1</sup> **6**,<sup>2</sup> **7**,<sup>3</sup> **8**,<sup>4</sup> **9**,<sup>5</sup>, [**11**, **19**, **20**, **39**, **41**, **43**, **49**, **50**, **51**, **48**, **58**, **60**, **61**, **62**, **63**, and **64**]<sup>1</sup> were prepared according to known literature procedures. All other reagents were purchased from commercial sources and used without further purification. All solvents for work-up procedures were used as received. Flash column chromatography was performed according to the procedure of Still<sup>6</sup> using ICN Silitech 32-63 D 60Å silica gel with the indicated solvents. TBAF solution (1 M in THF) was prepared by adding 4Å molecular sieves (1 gm/mL) to a solution of TBAF•3H<sub>2</sub>O in THF and stirring for 4 h. For NHK reactions, DMSO was distilled under vacuum using CaH<sub>2</sub>, and the solution was degassed (3 cycles of freeze-pump-thaw). CrCl<sub>2</sub> and NiCl<sub>2</sub> were weighed inside a glove box. For all RCM reactions, CH<sub>2</sub>Cl<sub>2</sub> was deaerated by bubbling Argon (1 min/mL). Thin layer chromatography was performed on Analtech 60F<sub>254</sub> silica gel plates. Detection was performed using UV light, KMnO<sub>4</sub> stain, PMA stain and subsequent heating. <sup>1</sup>H and <sup>13</sup>C NMR spectra were recorded at the indicated field strength in CDCl<sub>3</sub> at rt. Chemical shifts are indicated in parts per million (ppm) downfield from tetramethylsilane (TMS, δ = 0.00) and referenced to the CDCl<sub>3</sub>. Splitting patterns are abbreviated as follows: s (singlet), d (doublet), t (triplet), q (quartet) and m (multiplet).

## Supporting Information

|                                                         |     |
|---------------------------------------------------------|-----|
| $^1\text{H}$ and $^{13}\text{C}$ NMR of <b>24</b> ..... | S5  |
| $^1\text{H}$ and $^{13}\text{C}$ NMR of <b>25</b> ..... | S7  |
| $^1\text{H}$ and $^{13}\text{C}$ NMR of <b>28</b> ..... | S9  |
| $^1\text{H}$ and $^{13}\text{C}$ NMR of <b>30</b> ..... | S11 |
| $^1\text{H}$ and $^{13}\text{C}$ NMR of <b>31</b> ..... | S13 |
| $^1\text{H}$ and $^{13}\text{C}$ NMR of <b>32</b> ..... | S15 |
| $^1\text{H}$ and $^{13}\text{C}$ NMR of <b>33</b> ..... | S17 |
| $^1\text{H}$ and $^{13}\text{C}$ NMR of <b>34</b> ..... | S19 |
| $^1\text{H}$ and $^{13}\text{C}$ NMR of <b>35</b> ..... | S21 |
| $^1\text{H}$ and $^{13}\text{C}$ NMR of <b>36</b> ..... | S23 |
| $^1\text{H}$ and $^{13}\text{C}$ NMR of <b>37</b> ..... | S25 |
| $^1\text{H}$ and $^{13}\text{C}$ NMR of <b>38</b> ..... | S27 |
| $^1\text{H}$ and $^{13}\text{C}$ NMR of <b>44</b> ..... | S29 |
| $^1\text{H}$ and $^{13}\text{C}$ NMR of <b>45</b> ..... | S31 |
| $^1\text{H}$ and $^{13}\text{C}$ NMR of <b>46</b> ..... | S33 |
| $^1\text{H}$ and $^{13}\text{C}$ NMR of <b>47</b> ..... | S35 |
| $^1\text{H}$ and $^{13}\text{C}$ NMR of <b>53</b> ..... | S37 |

|                                                         |     |
|---------------------------------------------------------|-----|
| $^1\text{H}$ and $^{13}\text{C}$ NMR of <b>54</b> ..... | S39 |
| $^1\text{H}$ and $^{13}\text{C}$ NMR of <b>55</b> ..... | S41 |
| $^1\text{H}$ and $^{13}\text{C}$ NMR of <b>57</b> ..... | S43 |
| Full assignment of compound <b>62 using</b> 2DNMR.....  | S45 |
| X-ray data for compound <b>35</b> .....                 | S55 |

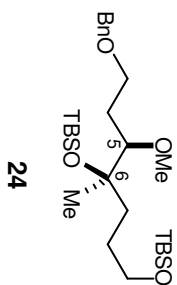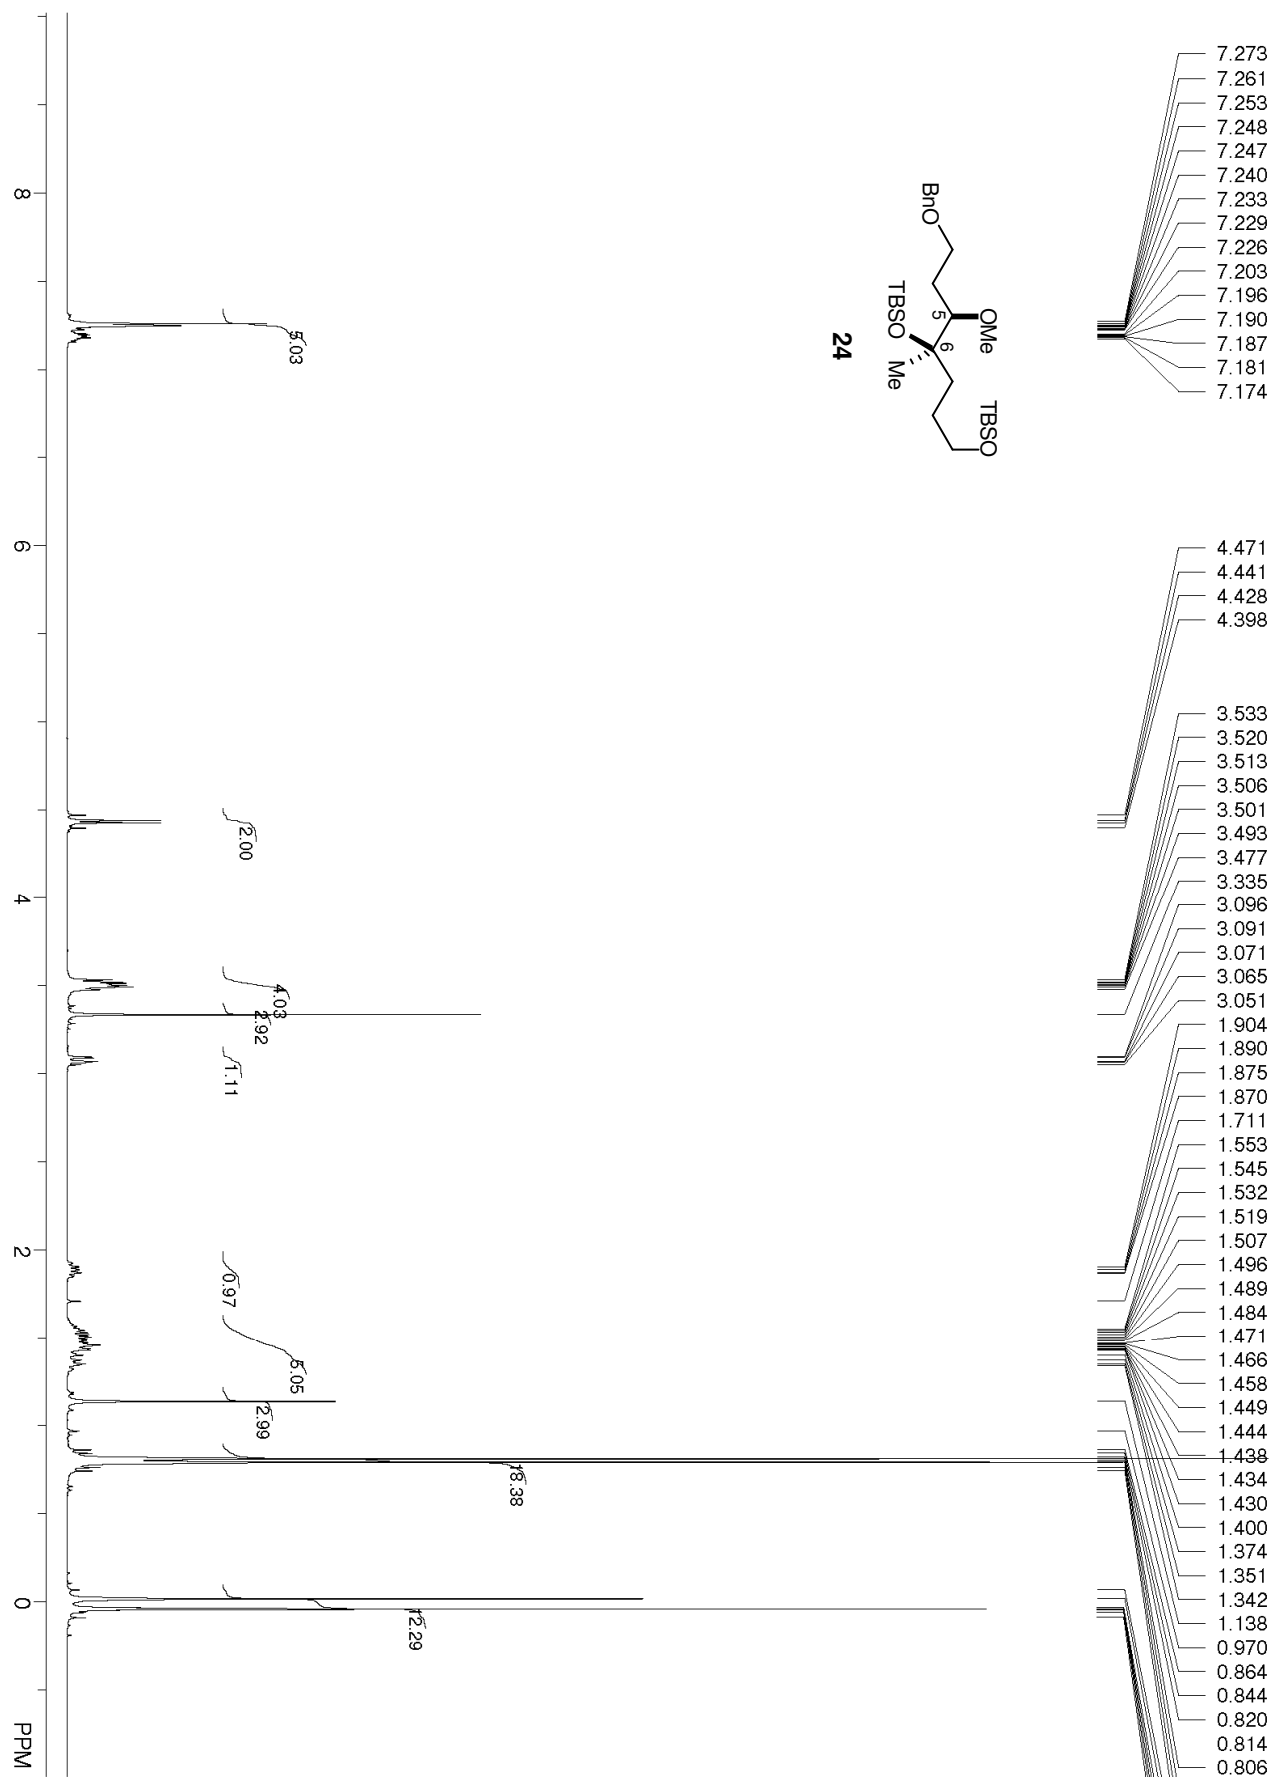



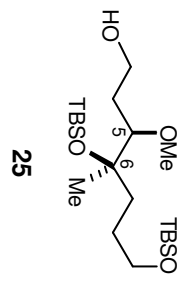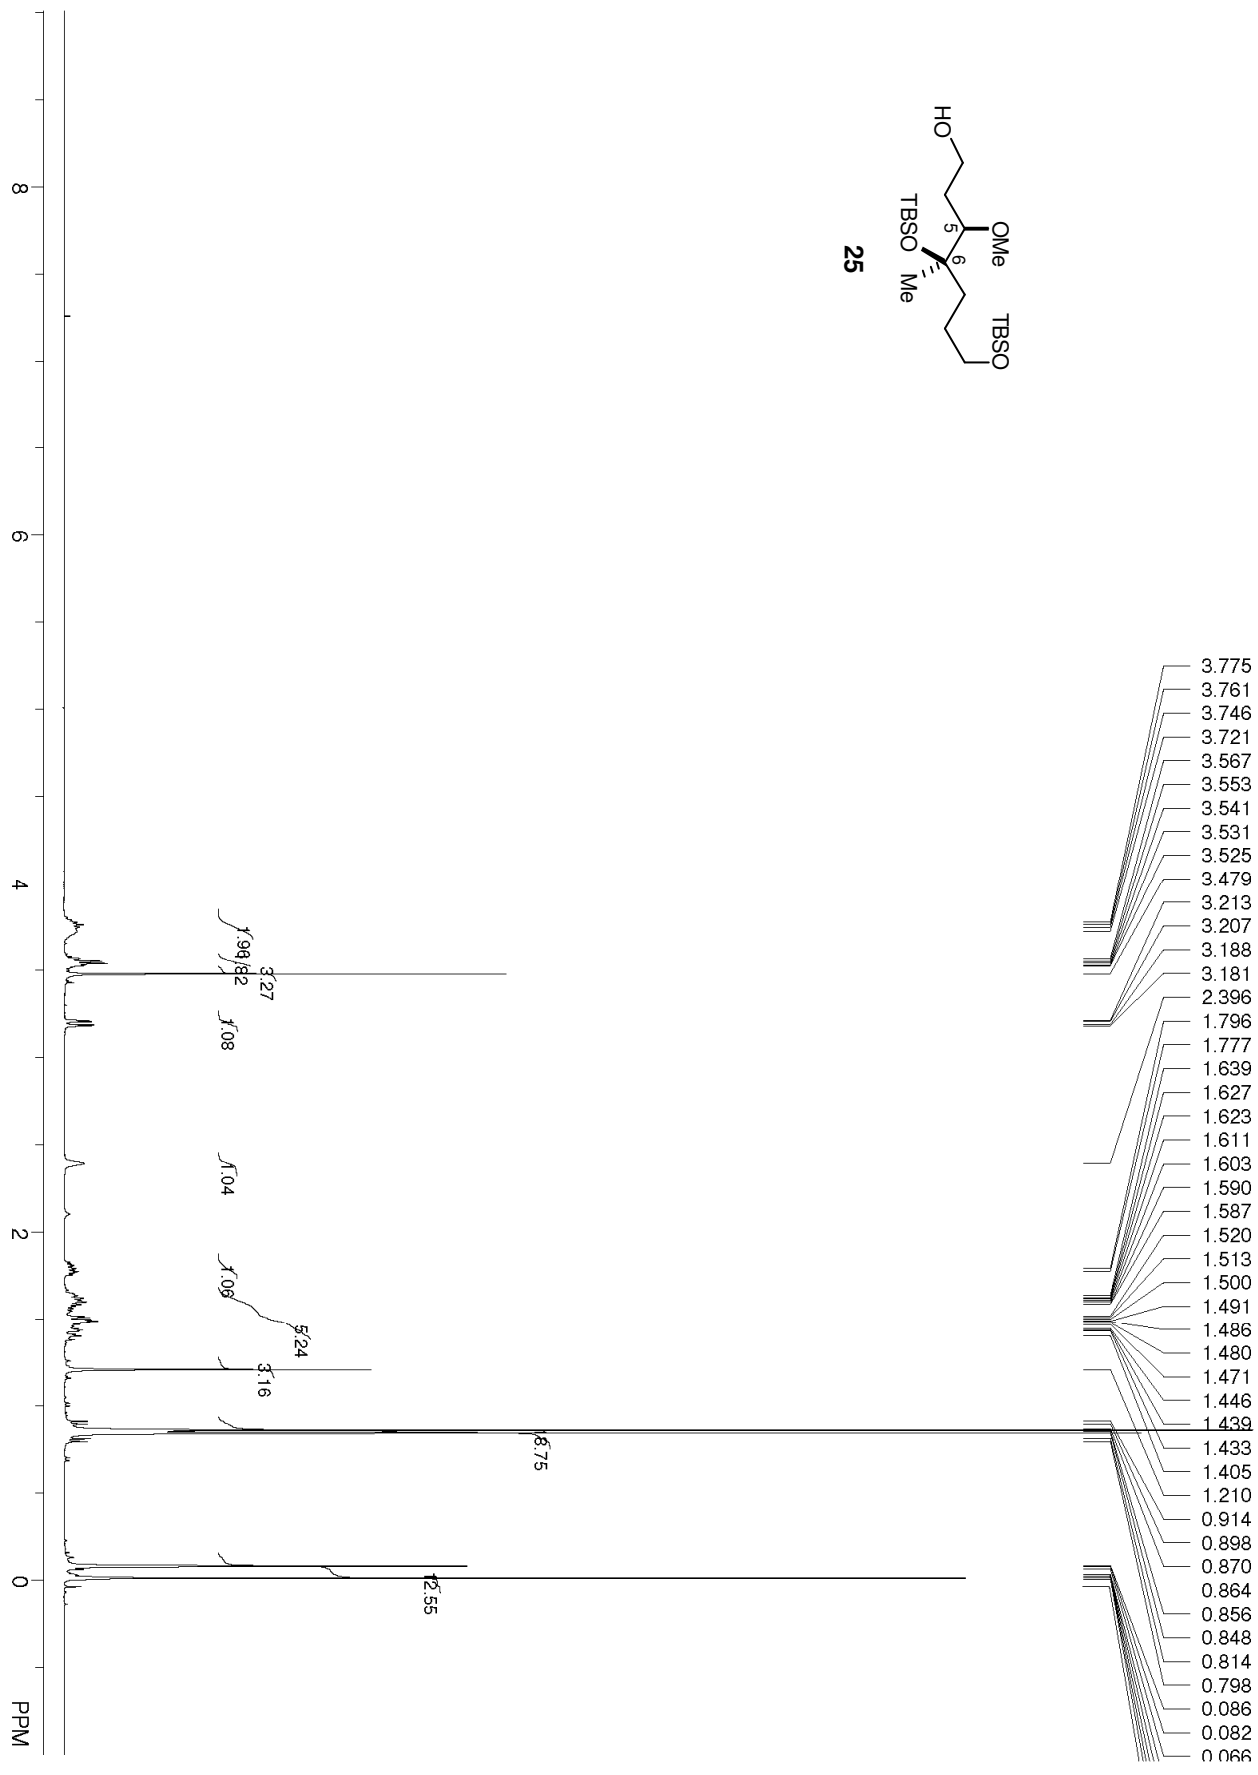

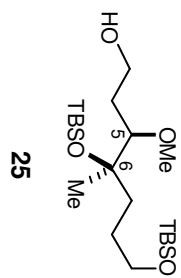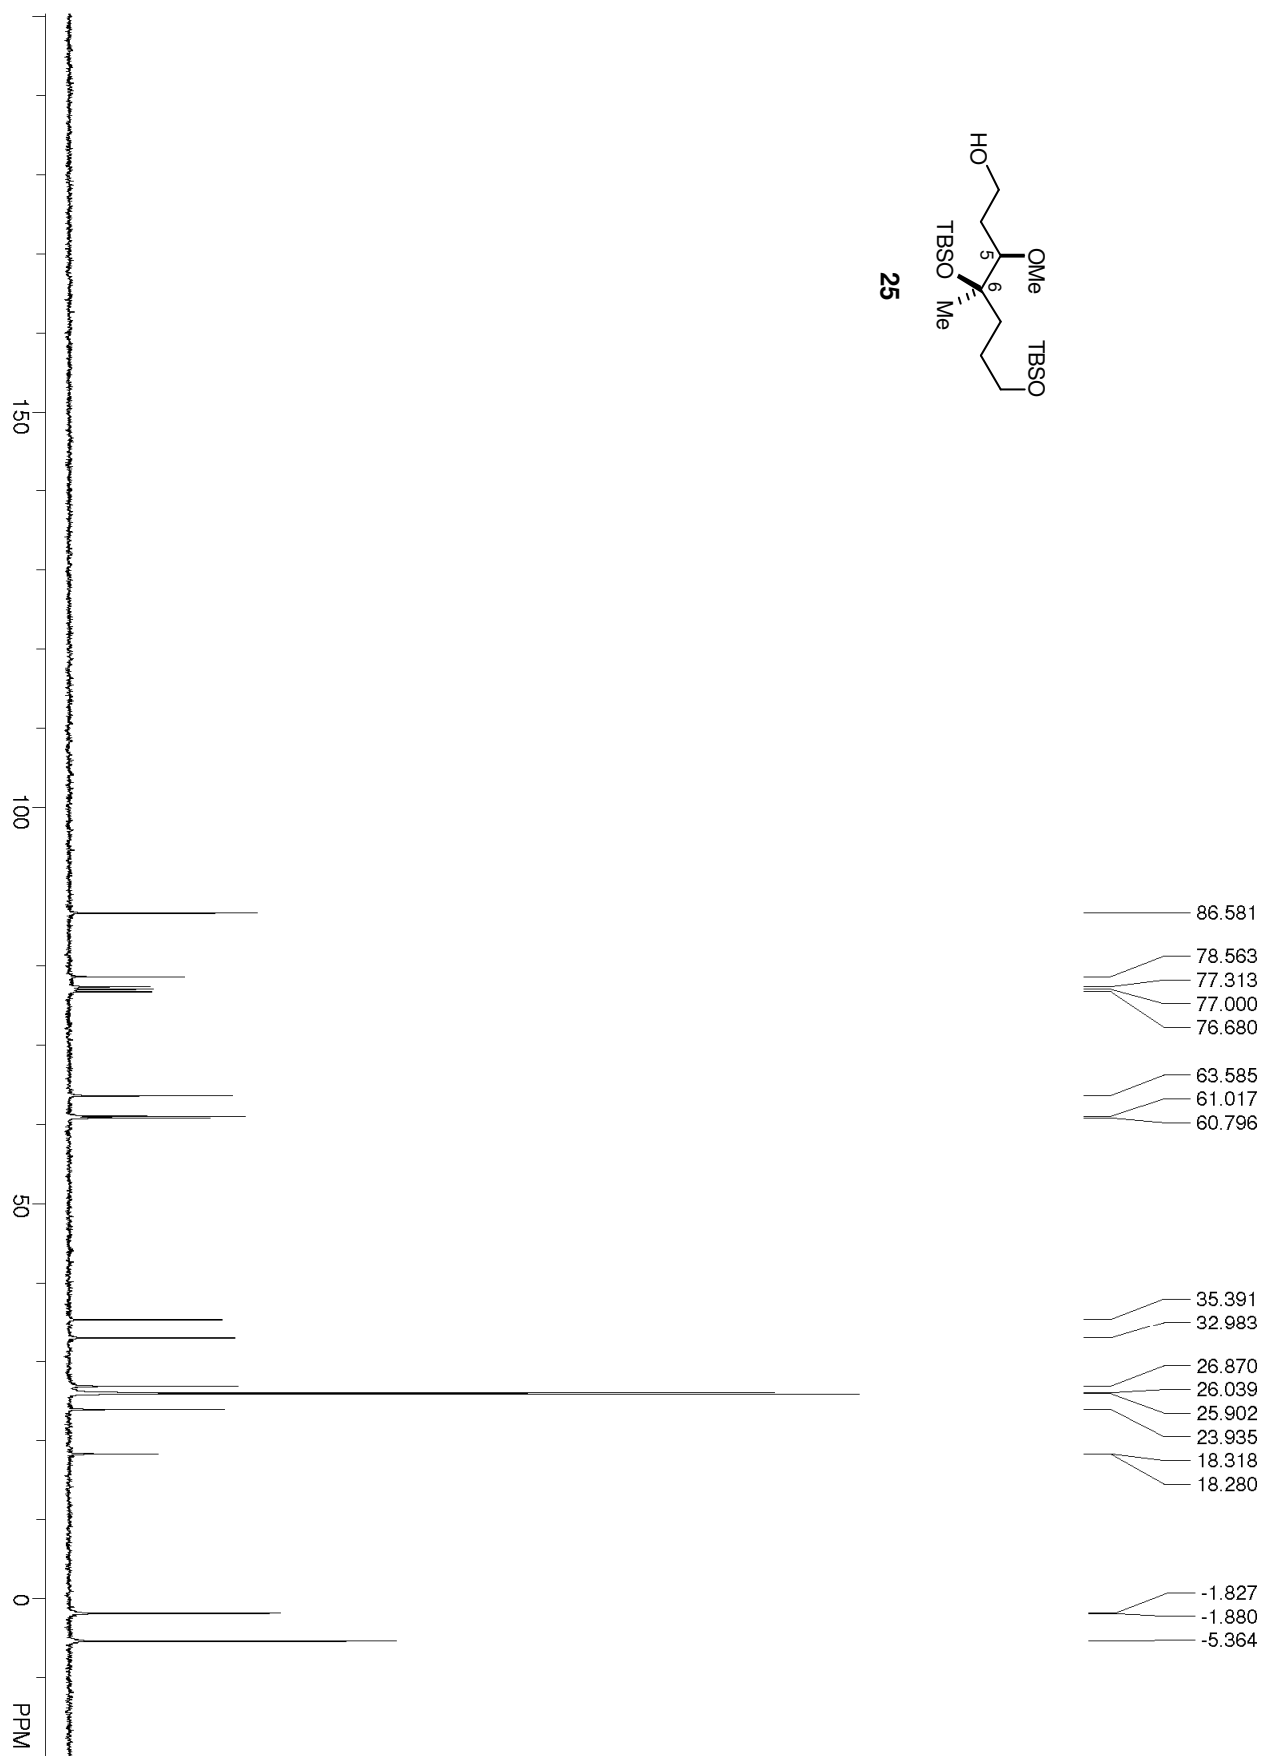



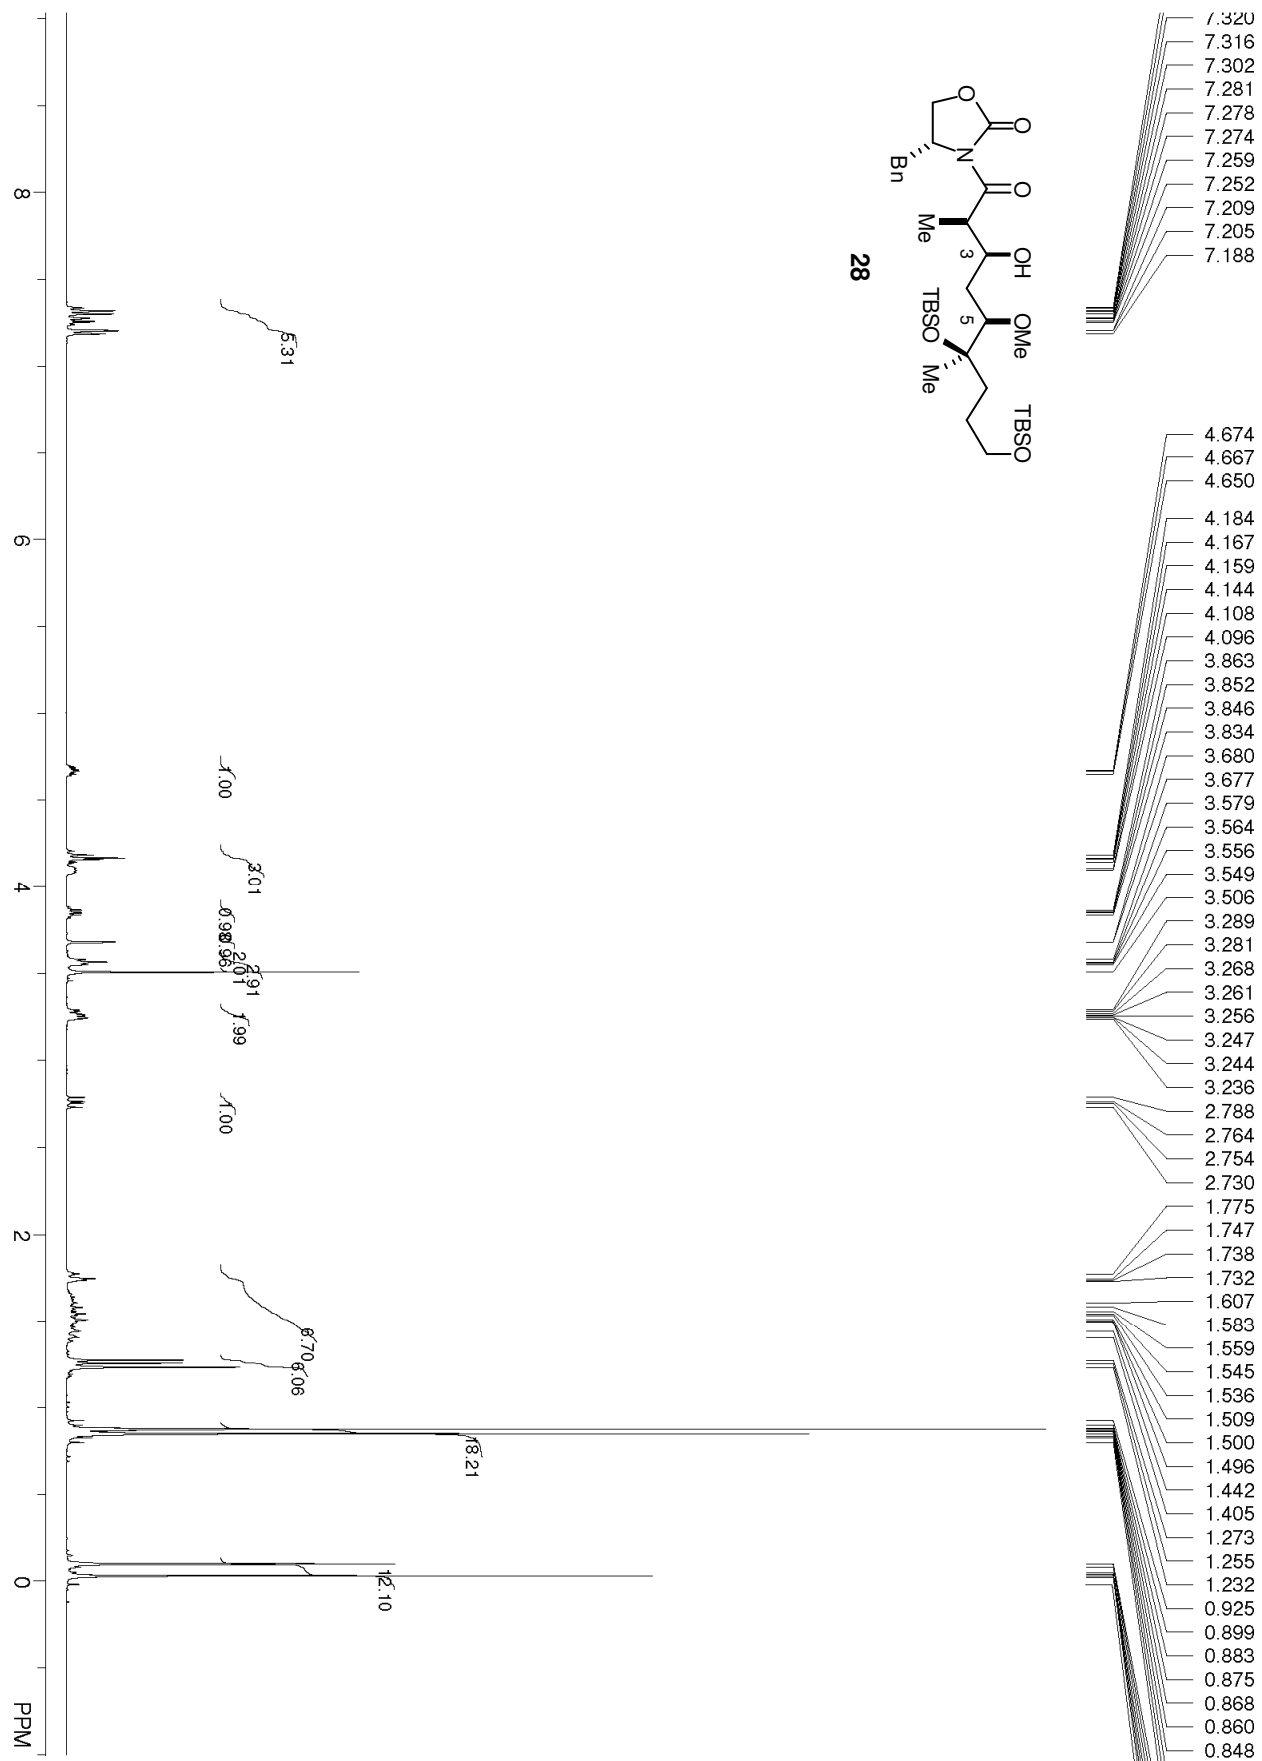

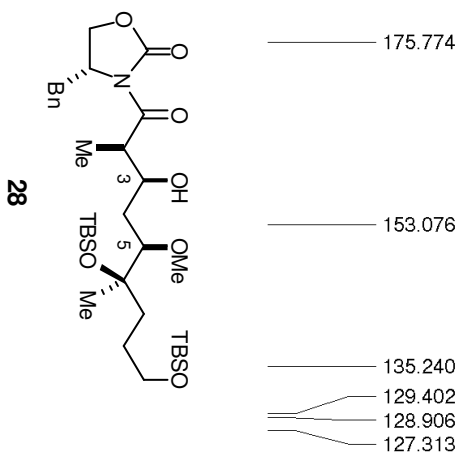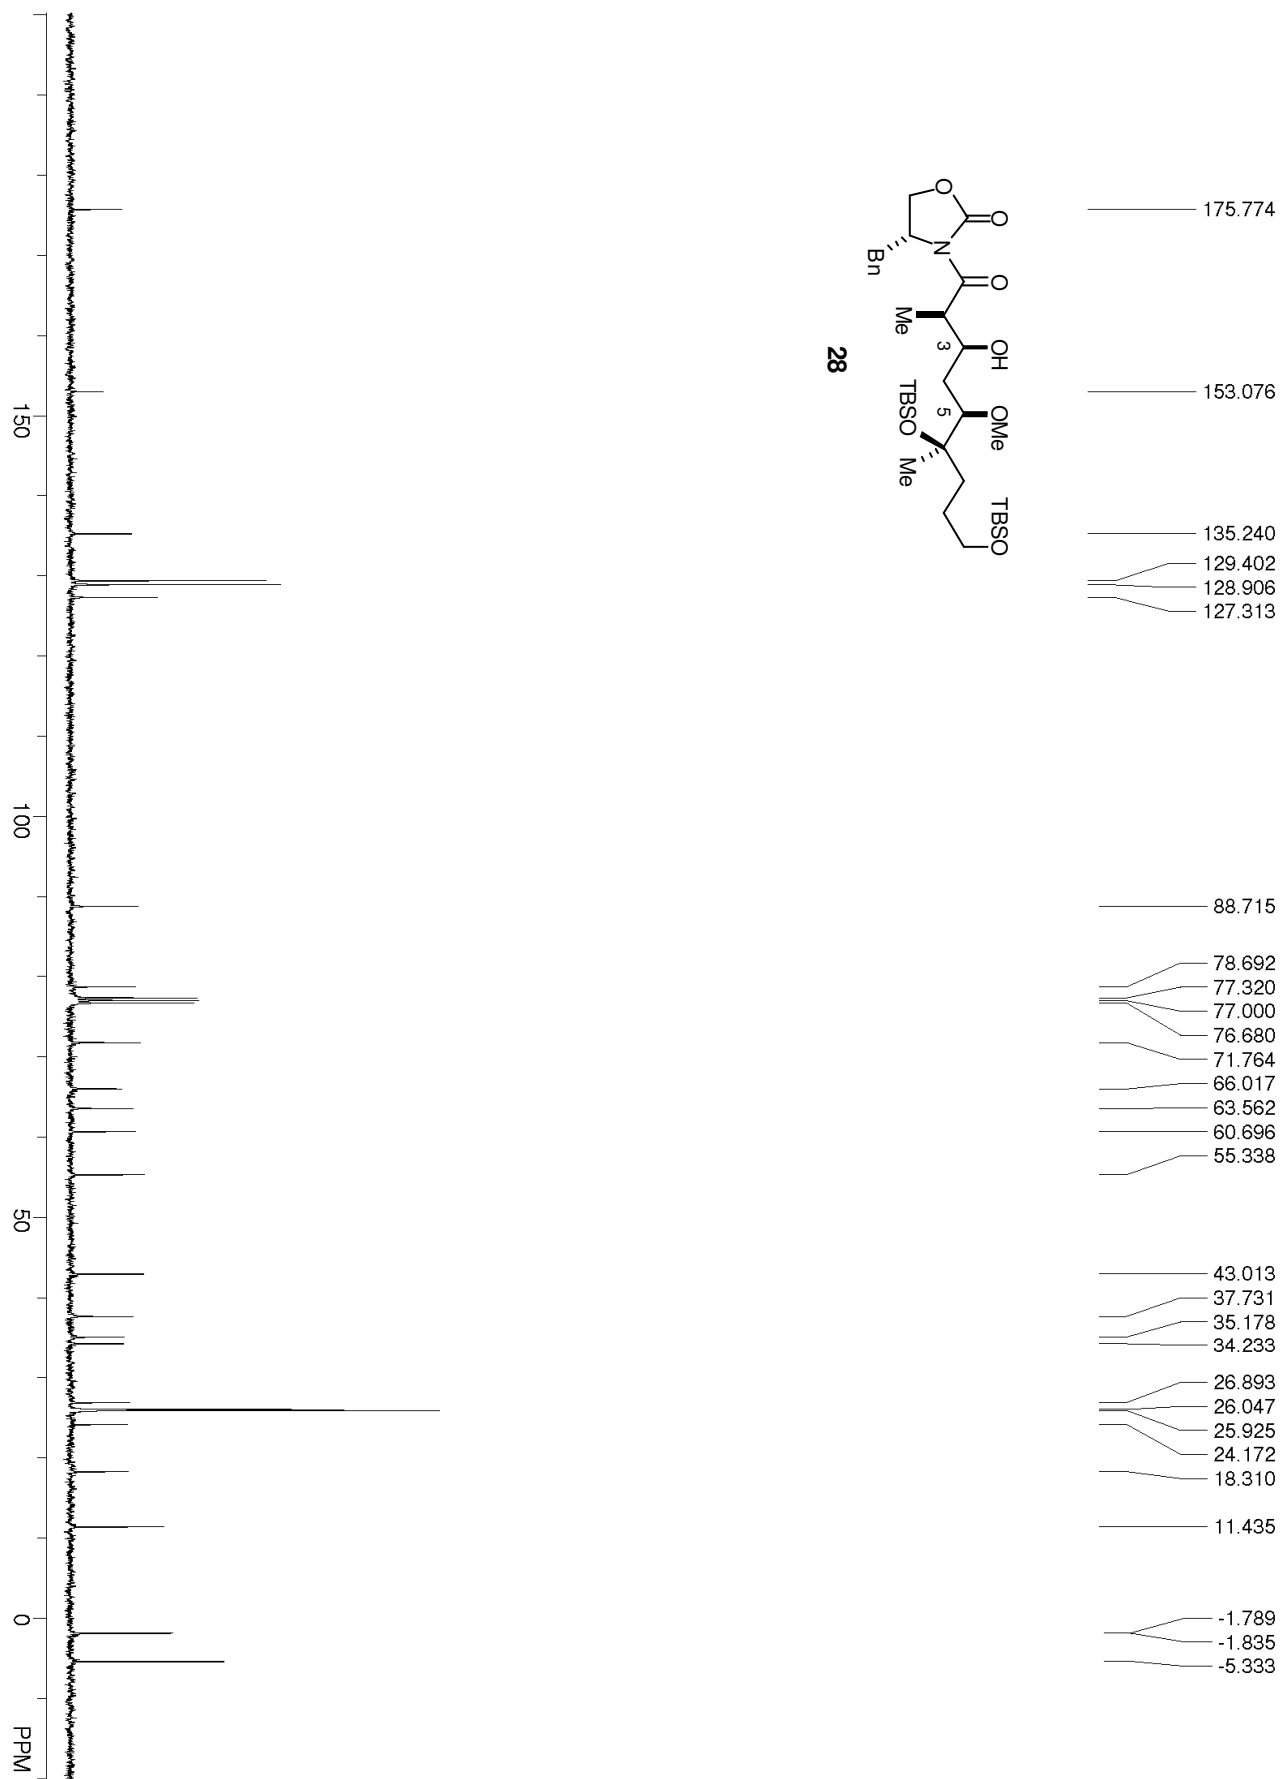

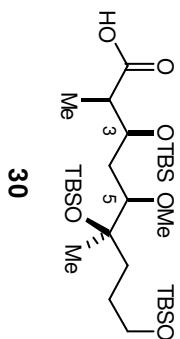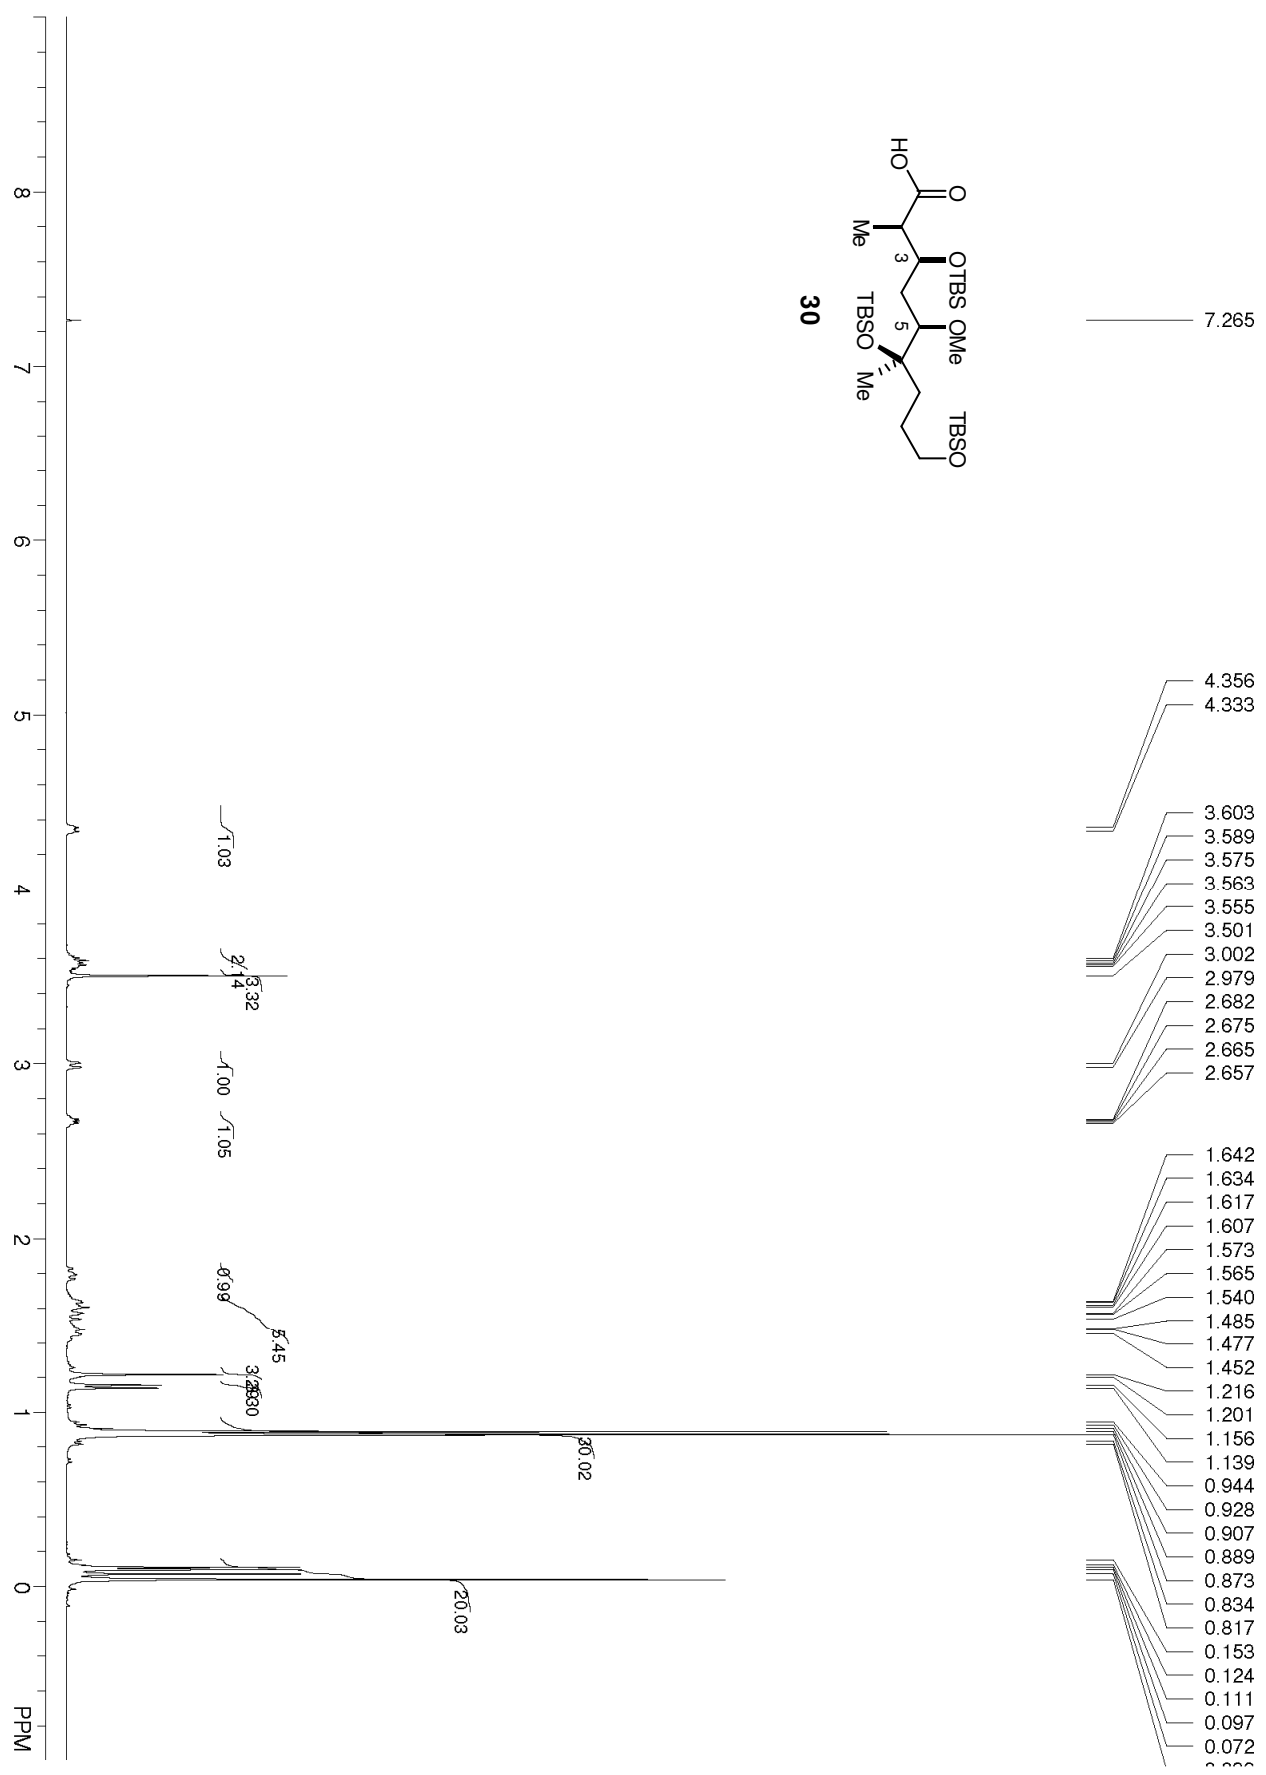

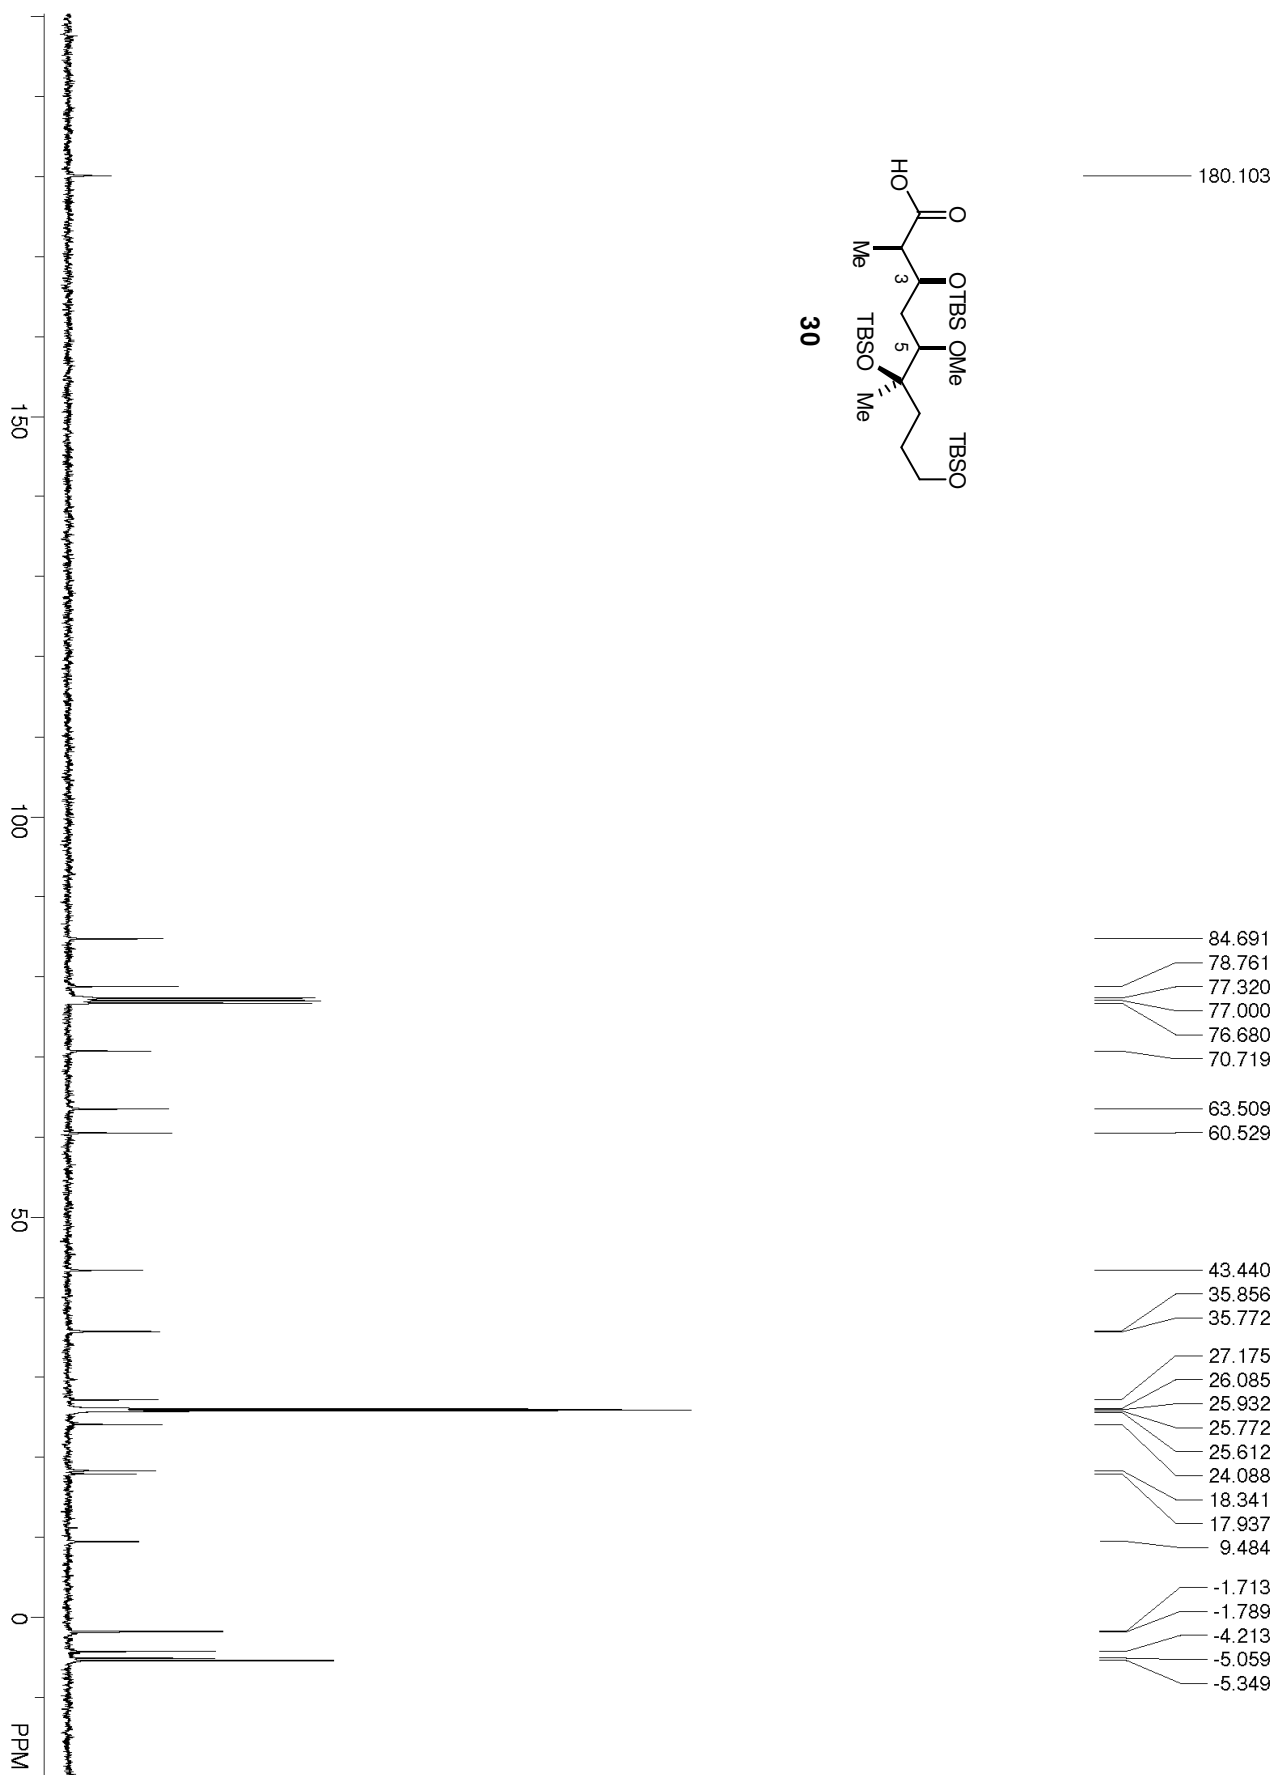

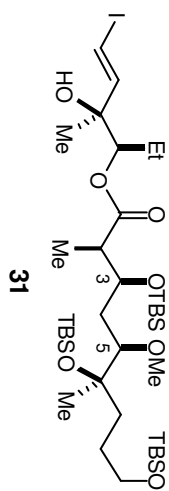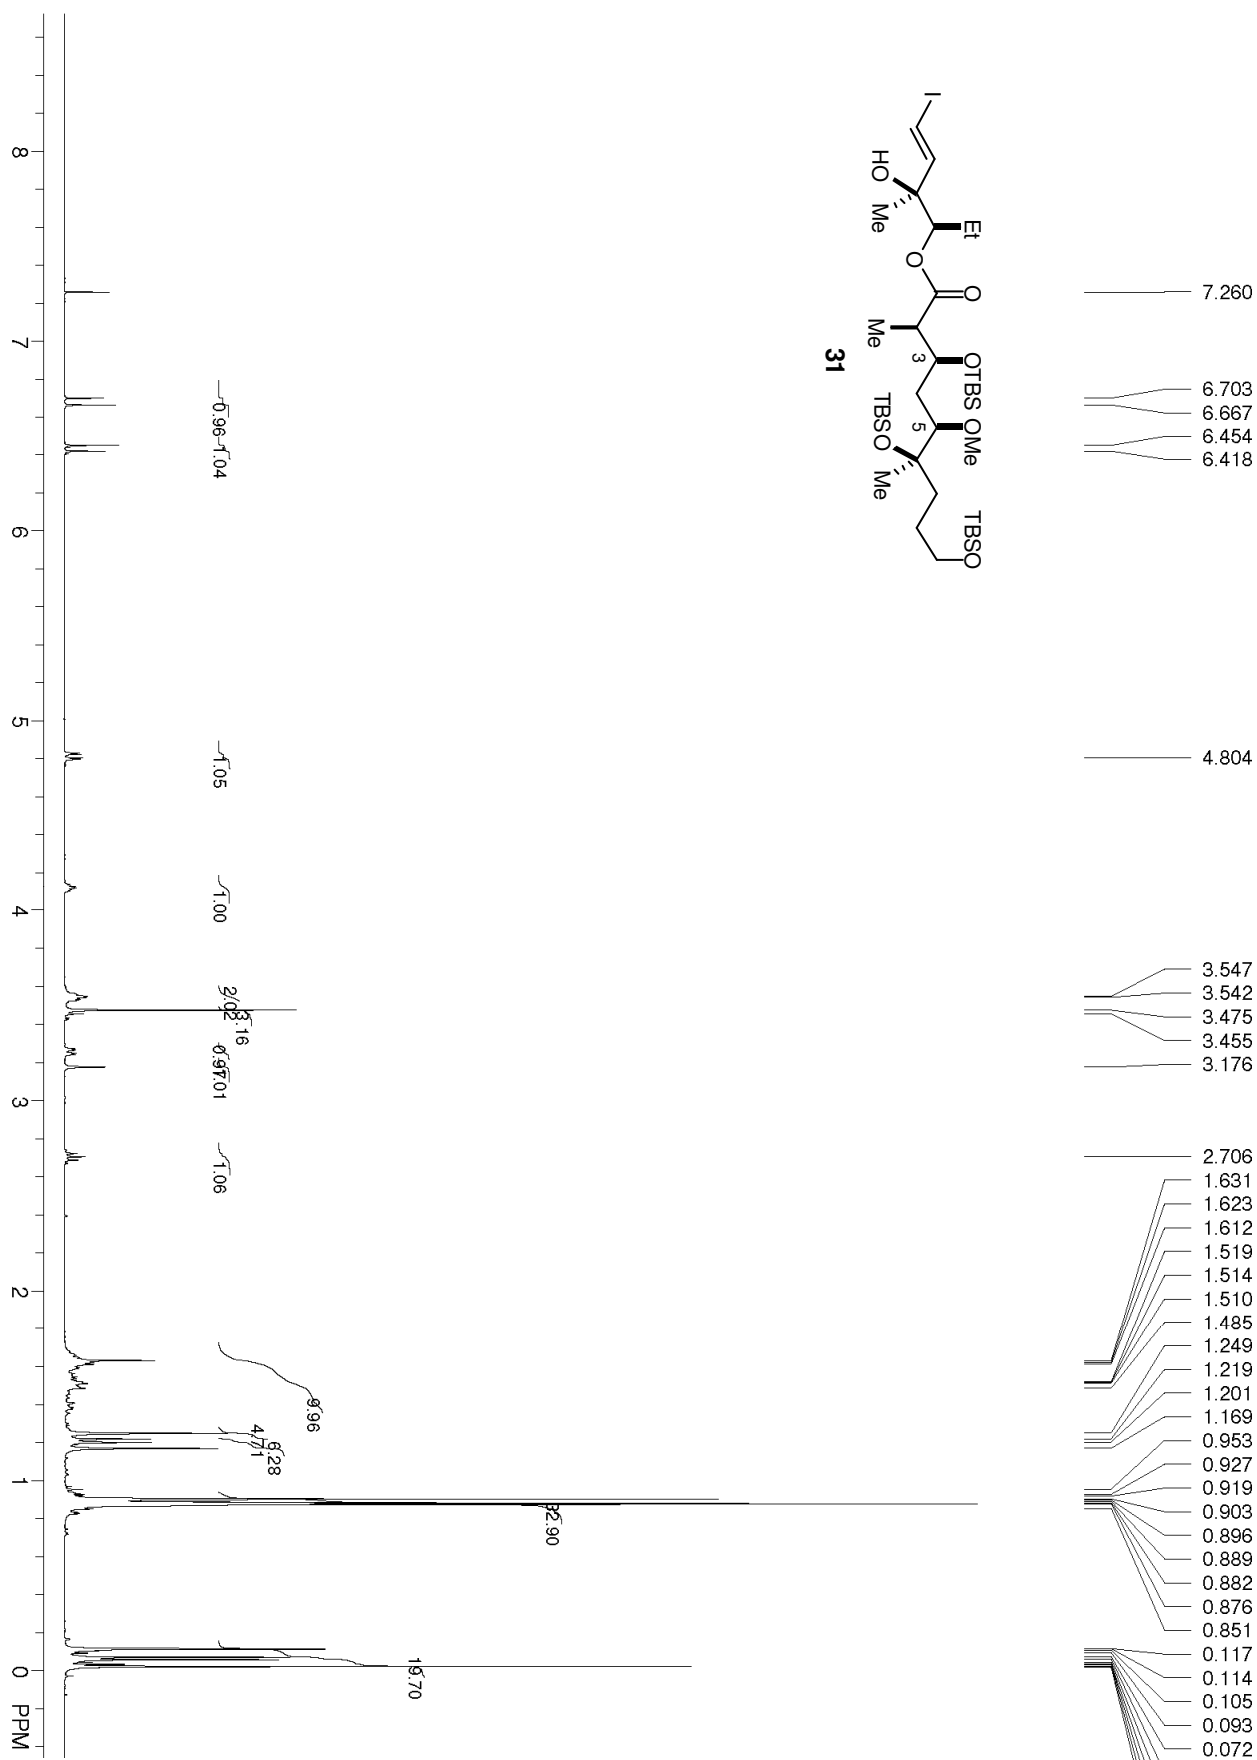

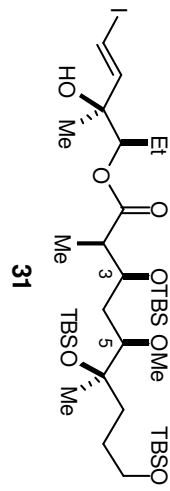

175.804

148.022

83.898  
80.224  
79.294  
77.739  
77.313  
77.000  
76.680  
71.230  
63.463  
60.697

44.340  
36.550  
35.231  
26.710  
26.245  
26.108  
25.925  
24.812  
23.516  
23.242  
18.440  
18.295  
18.029  
14.469  
10.696  
-1.621  
-1.735  
-3.870  
-4.510  
-5.386

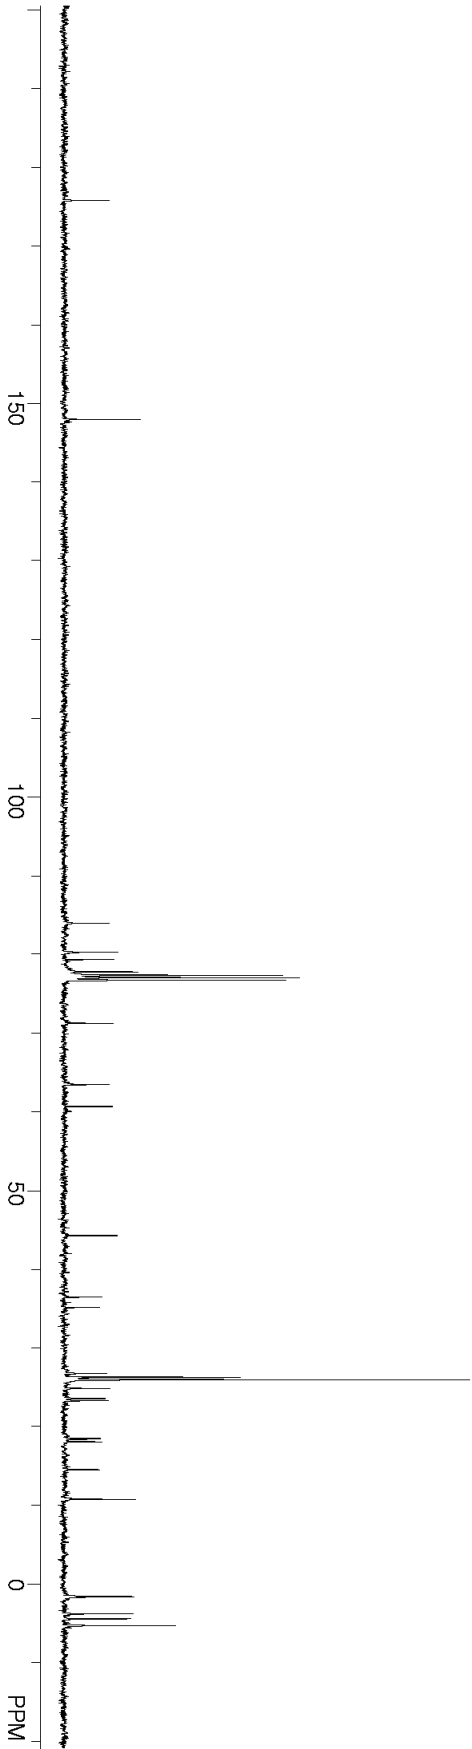

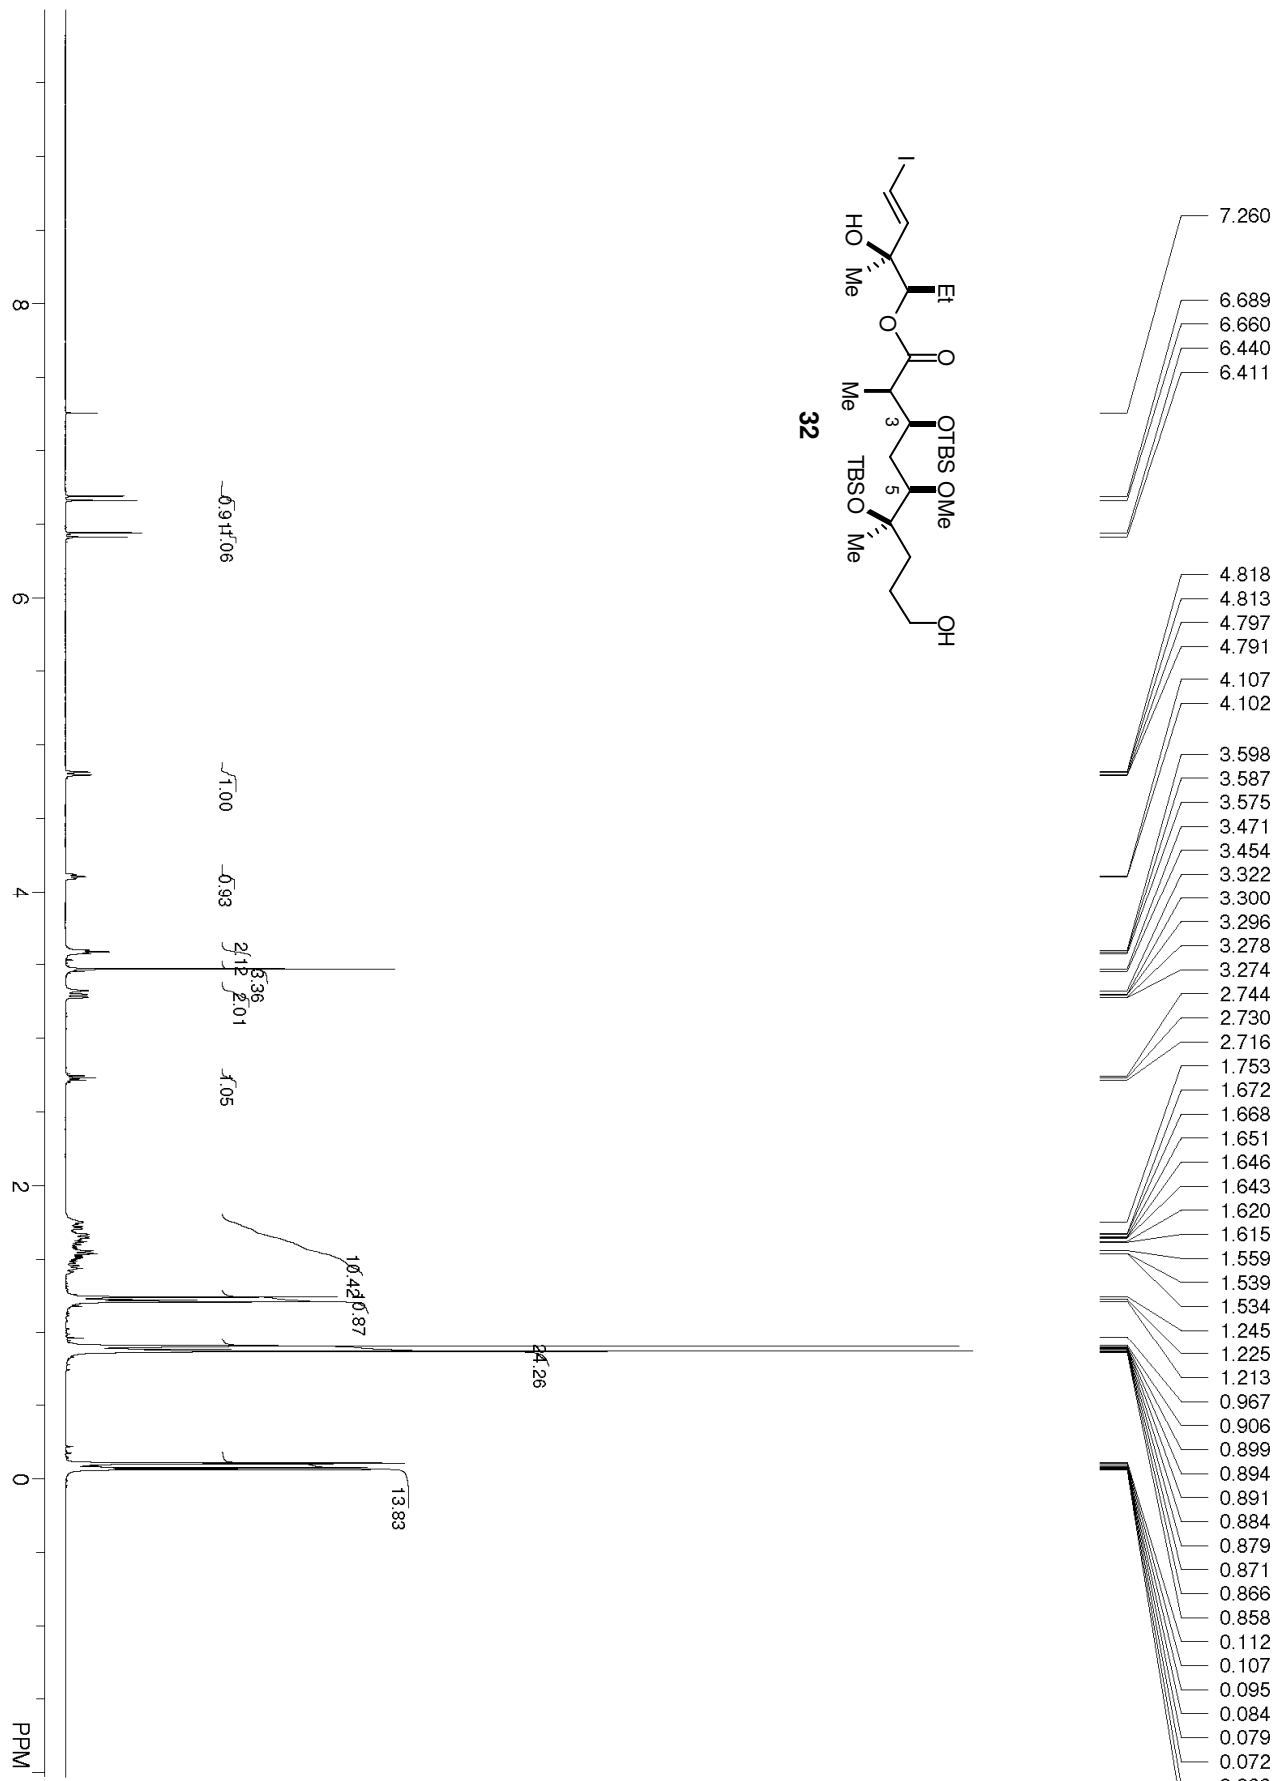

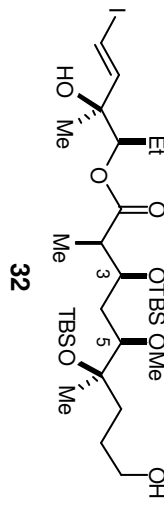

- 175.857
- 147.860
- 80.229
- 84.310
- 78.864
- 77.758
- 77.253
- 77.043
- 77.000
- 76.740
- 71.359
- 63.355
- 60.415
- 44.676
- 35.791
- 34.852
- 29.659
- 26.835
- 26.206
- 26.069
- 25.917
- 24.523
- 24.184
- 23.266
- 18.419
- 18.044
- 14.981
- 10.669
- 1.582
- 1.719
- 1.806
- 3.915
- 4.522

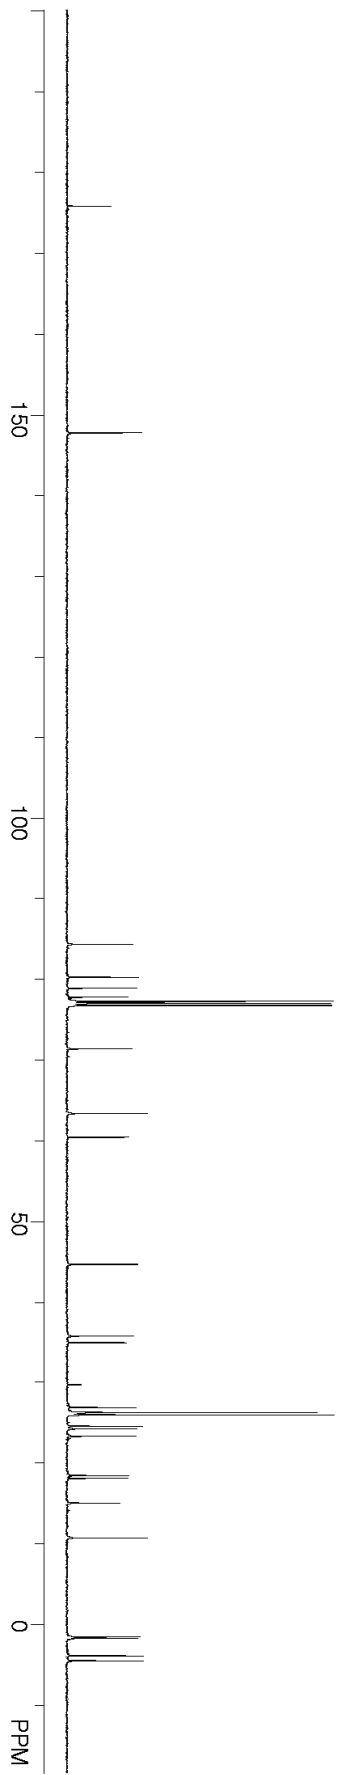



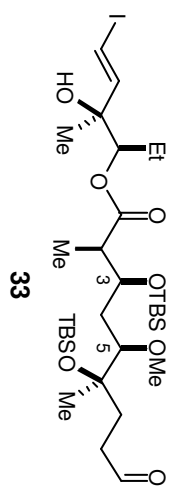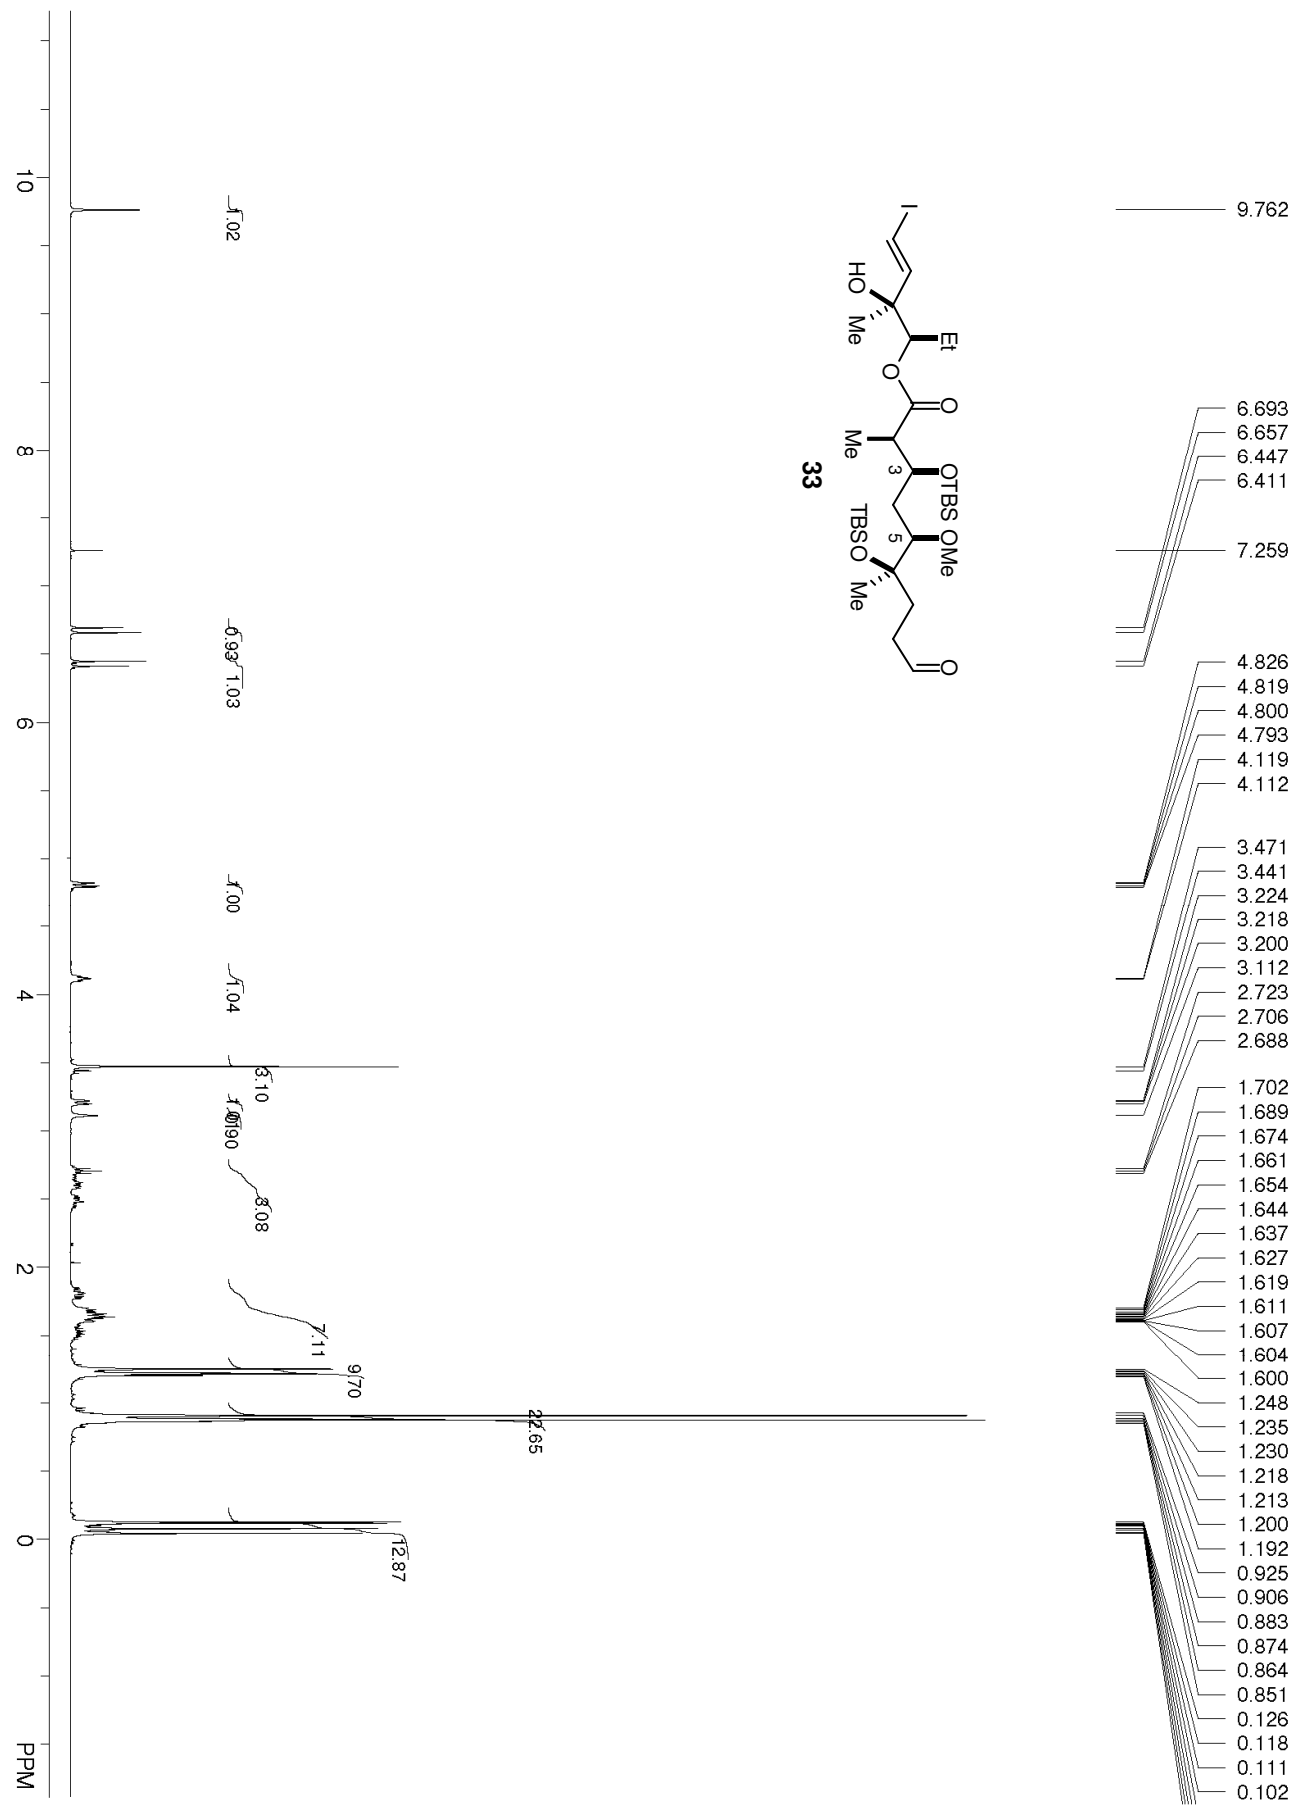

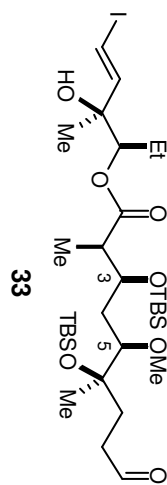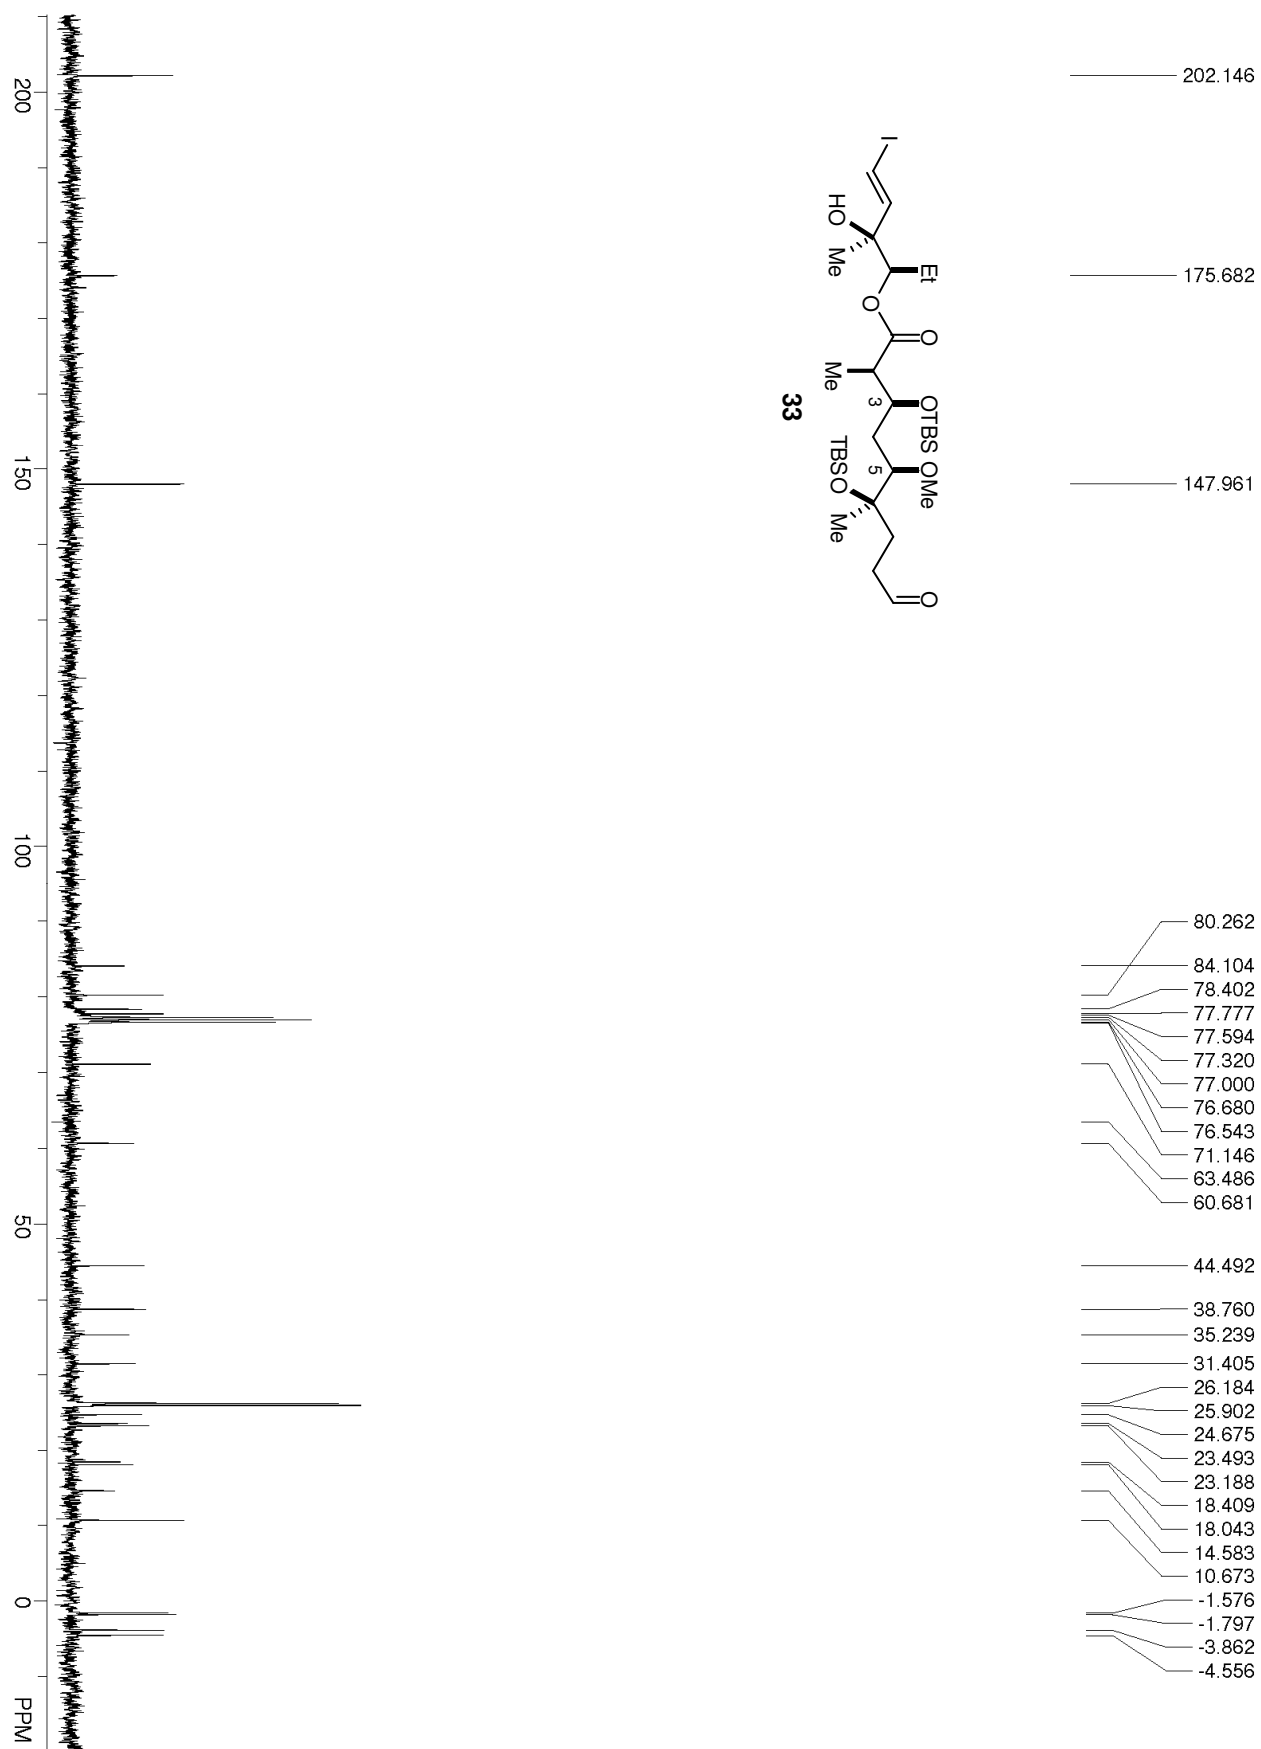

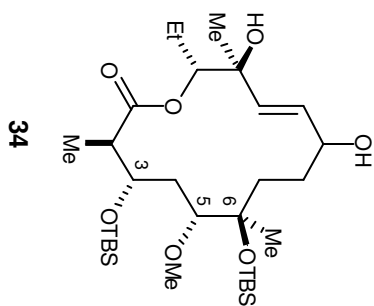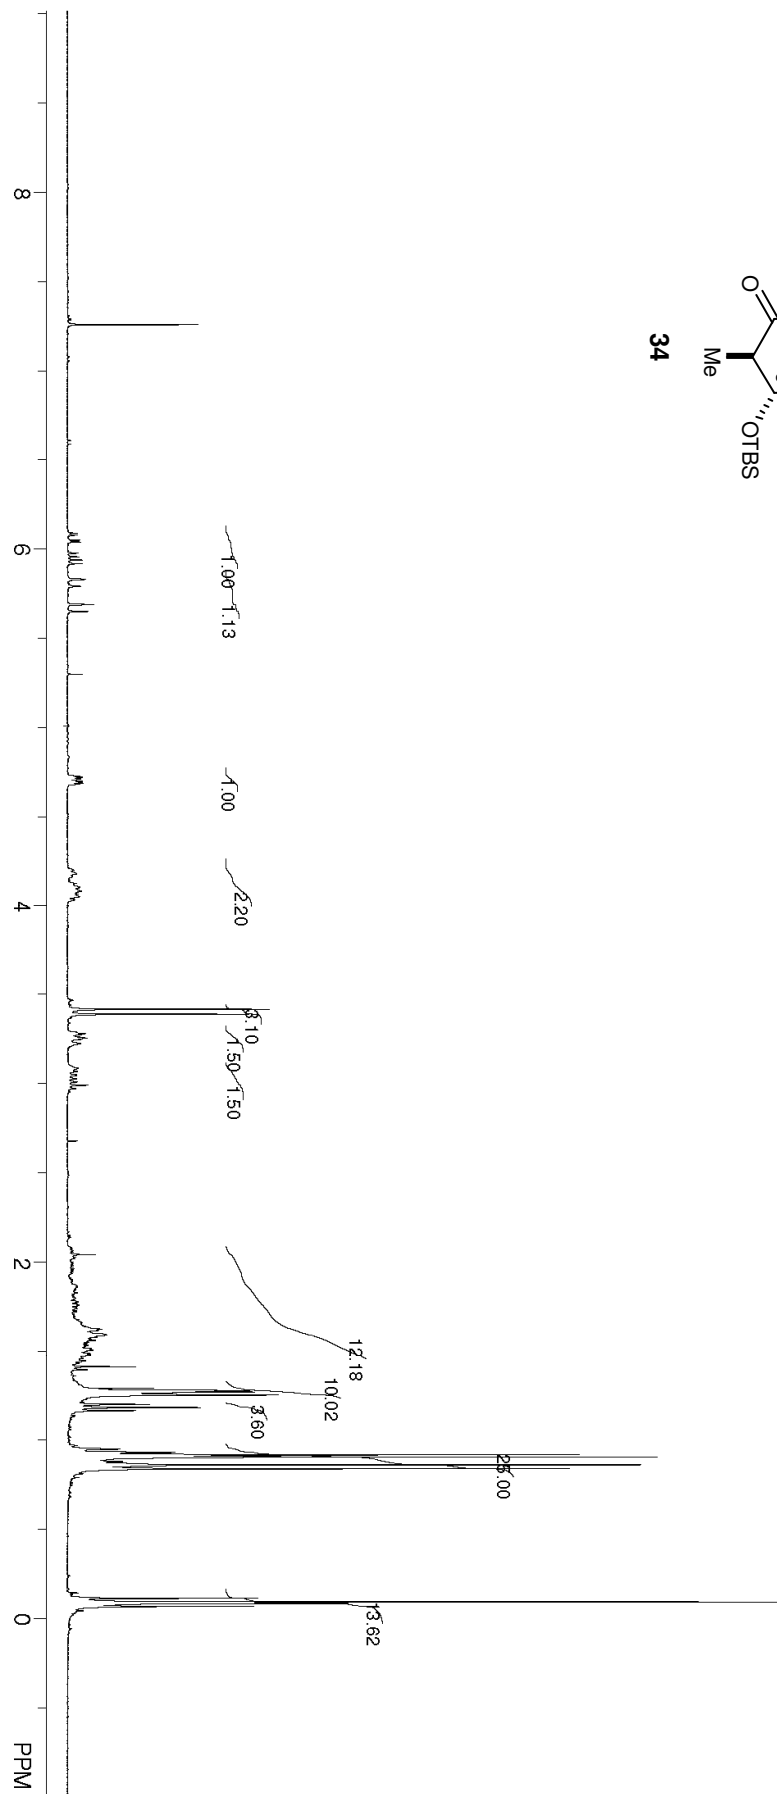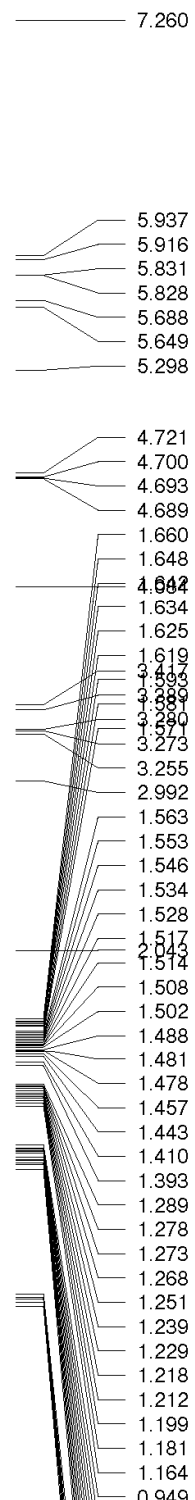

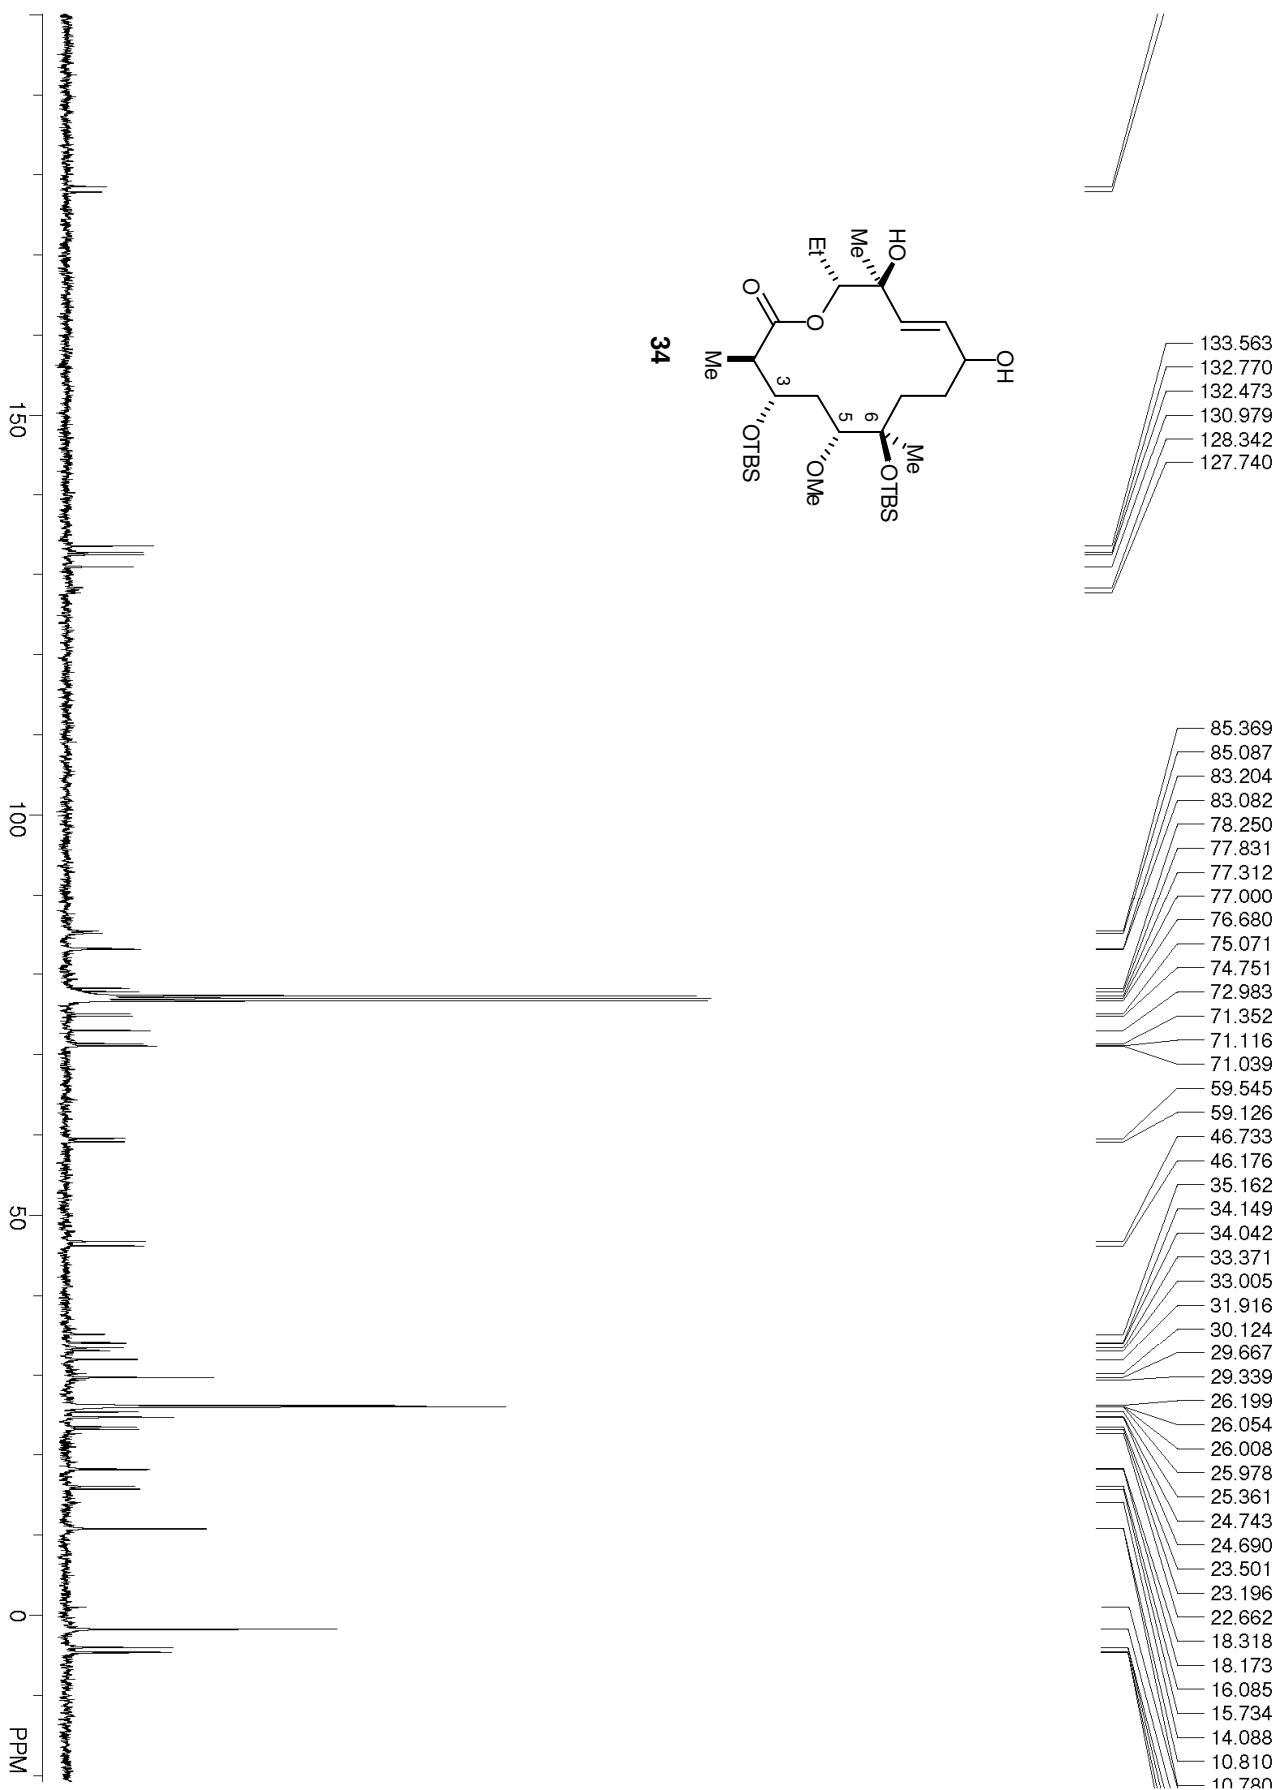

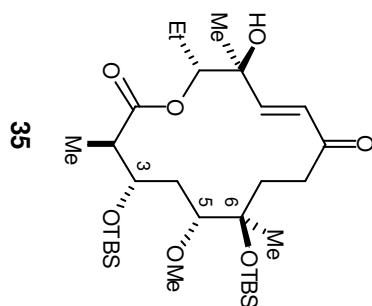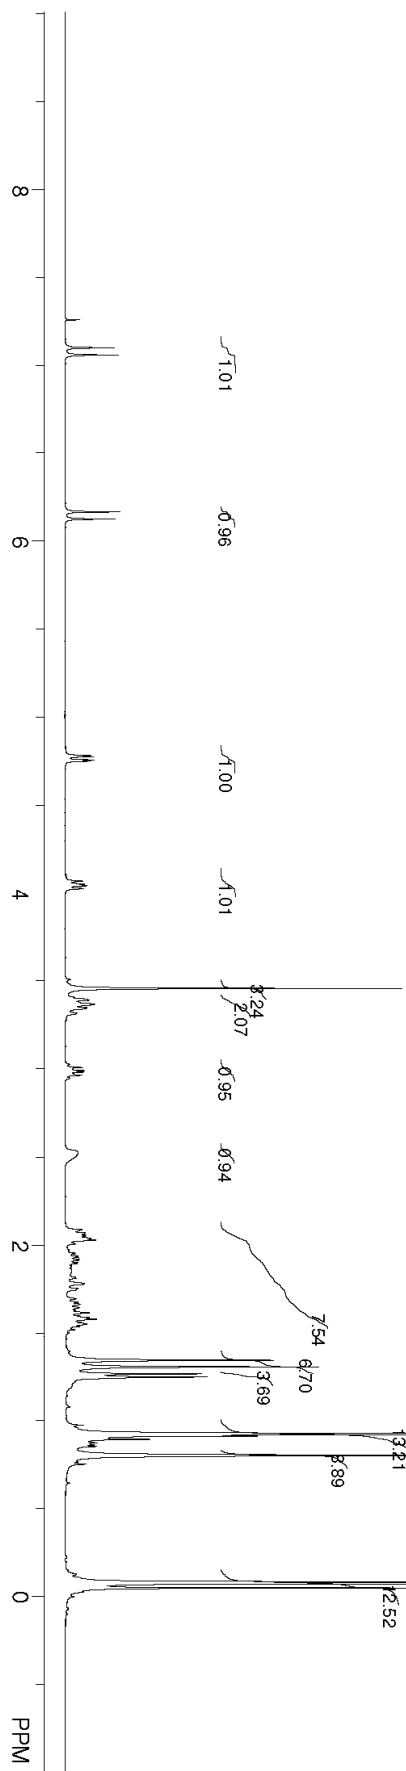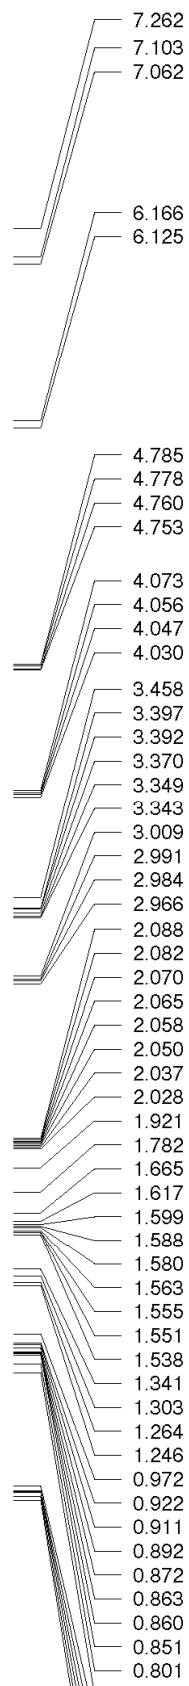

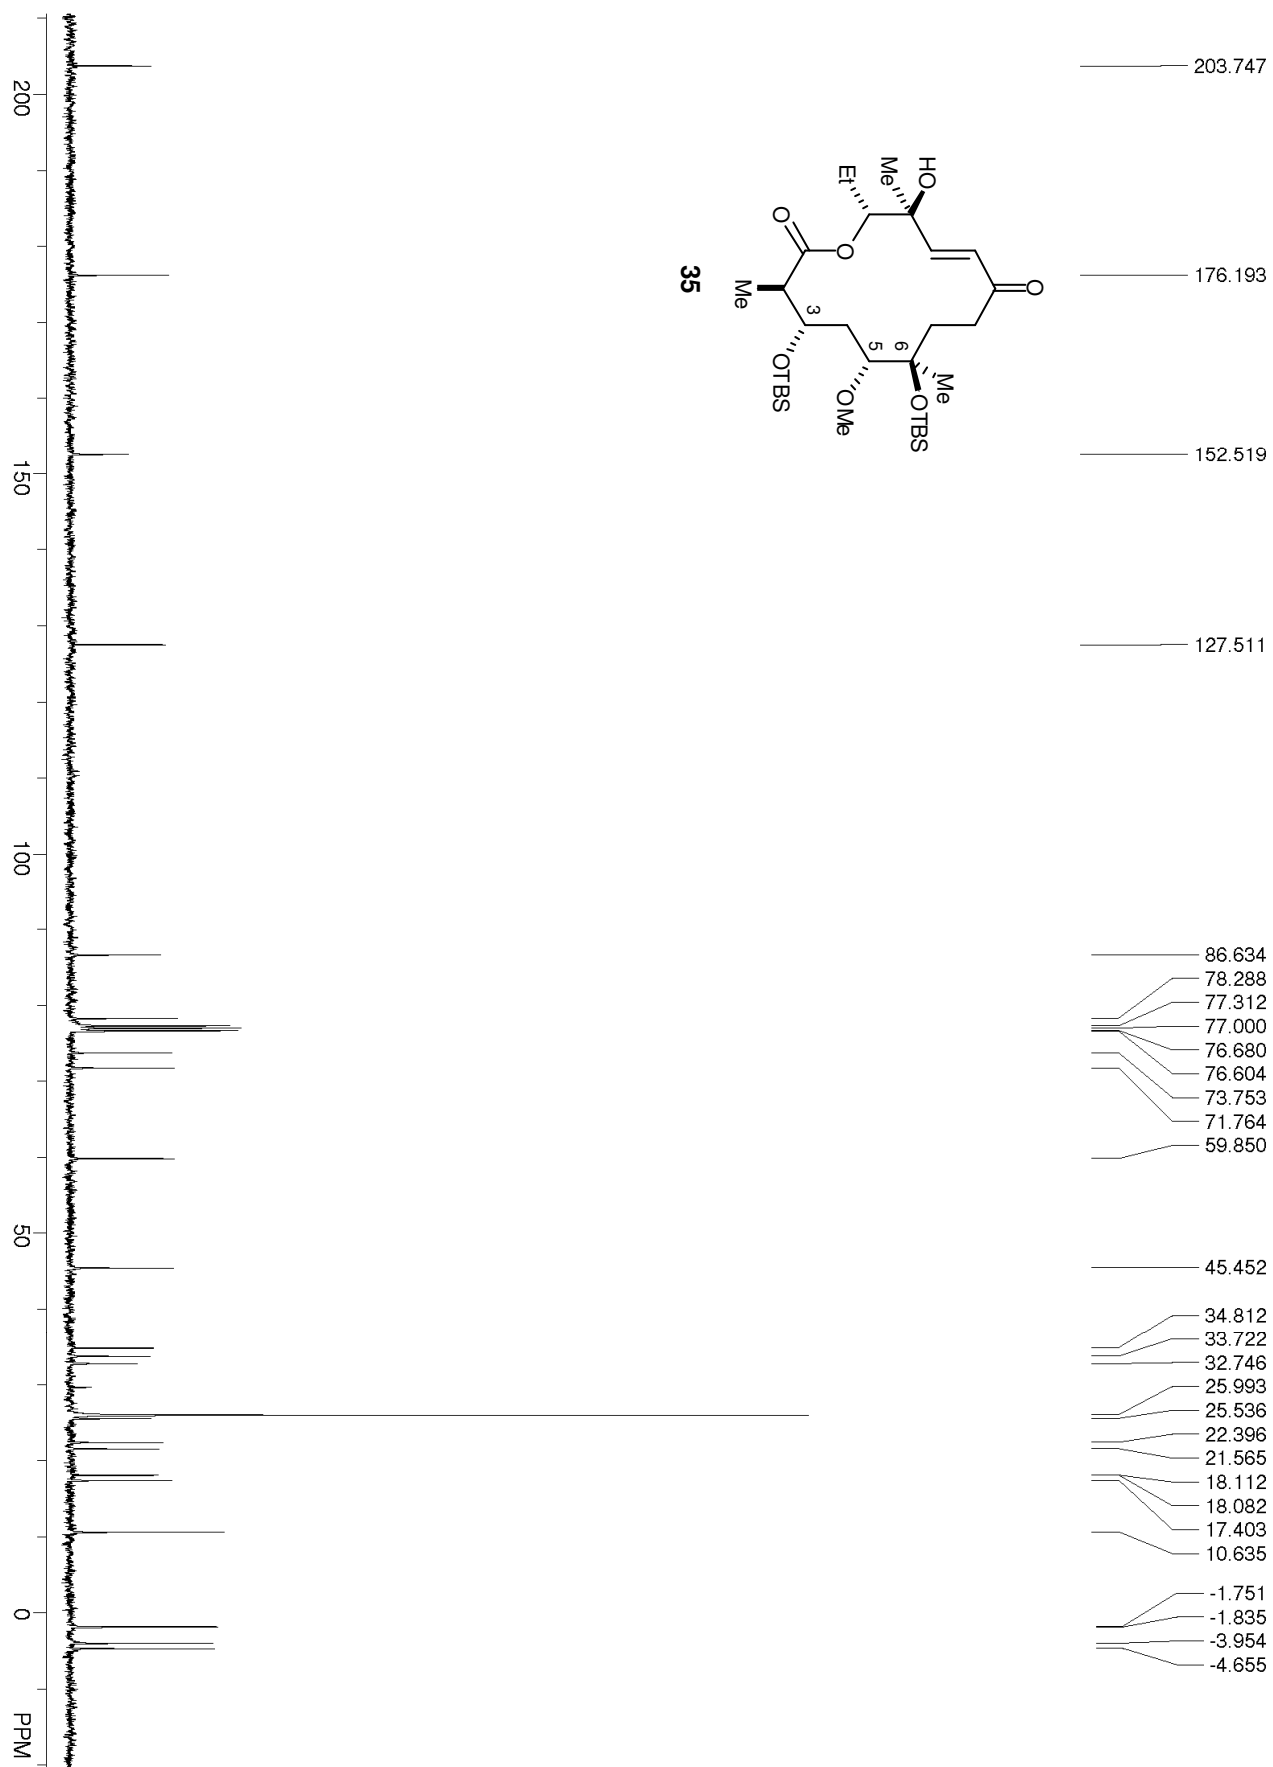

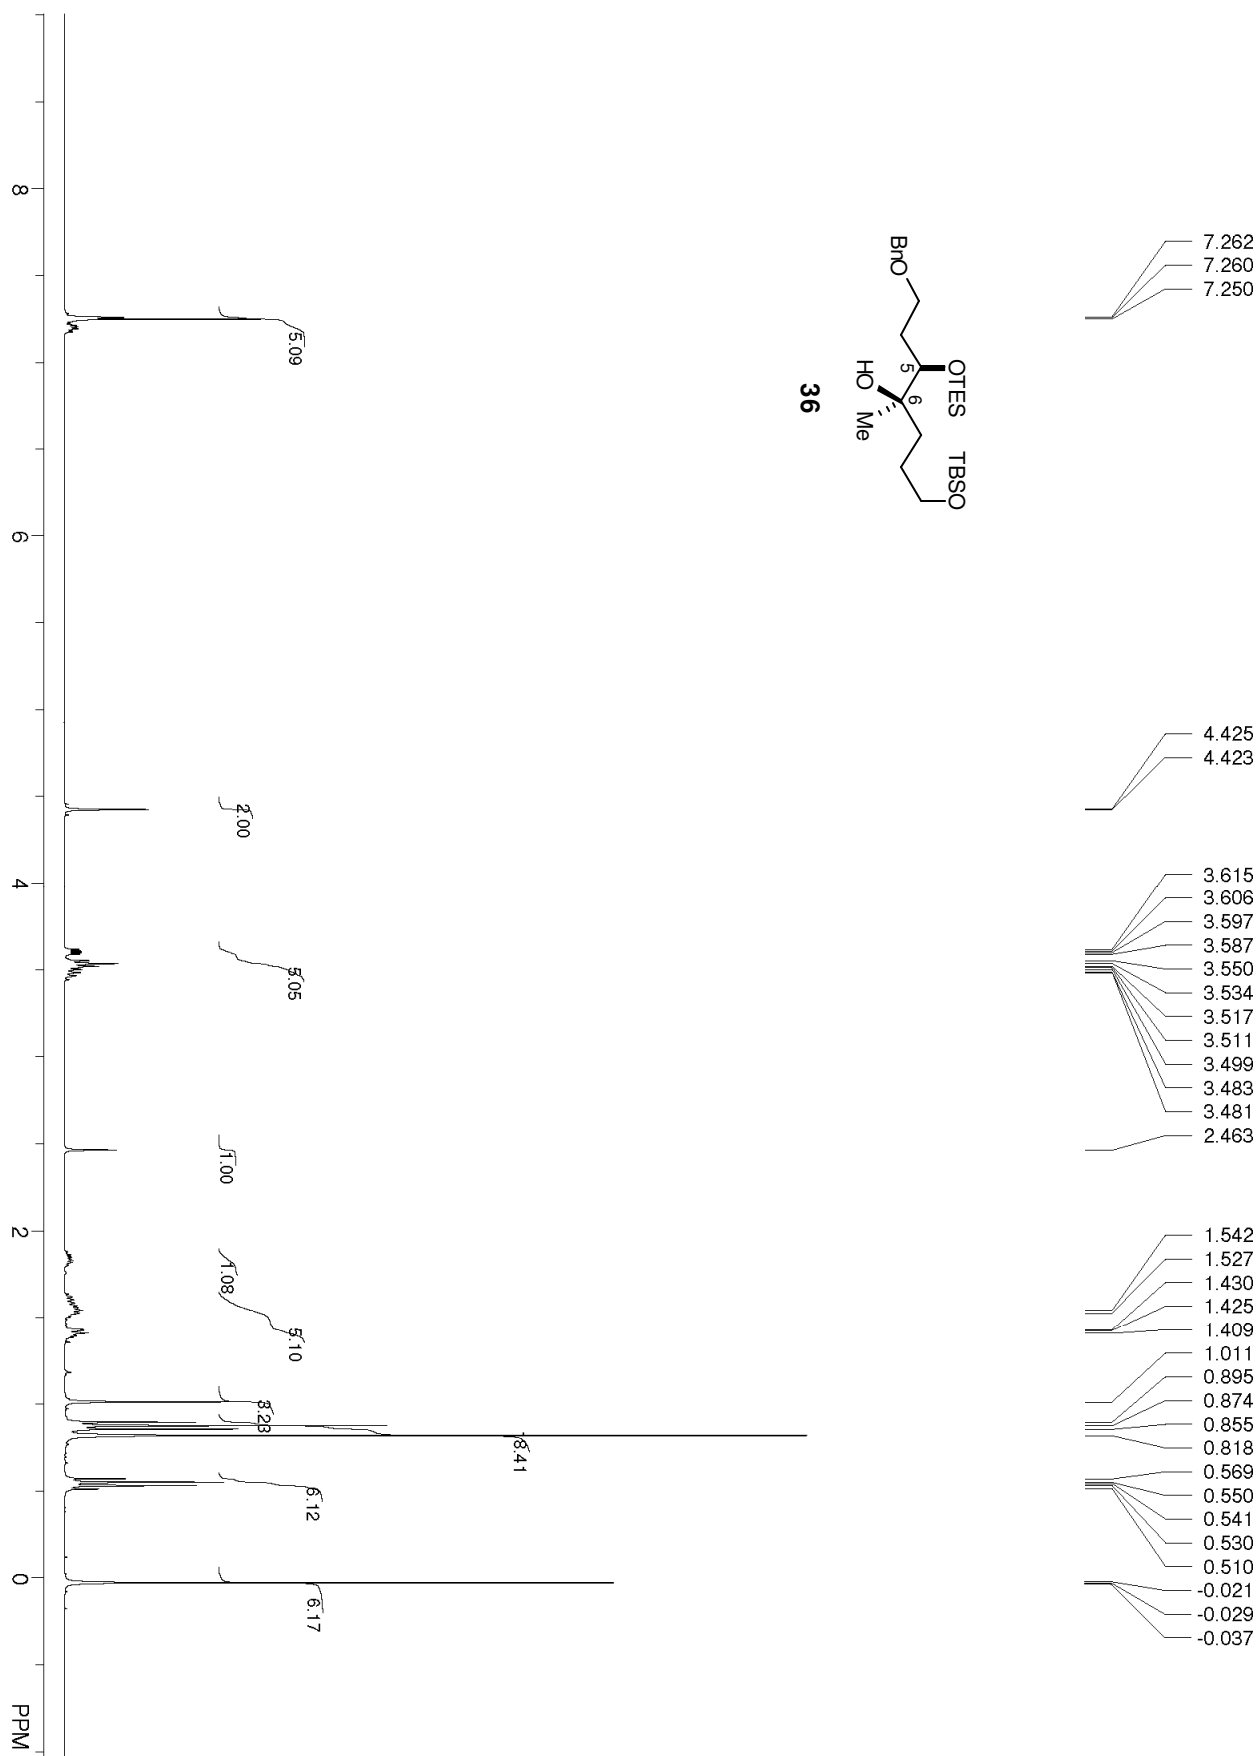

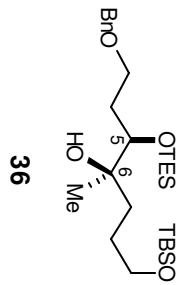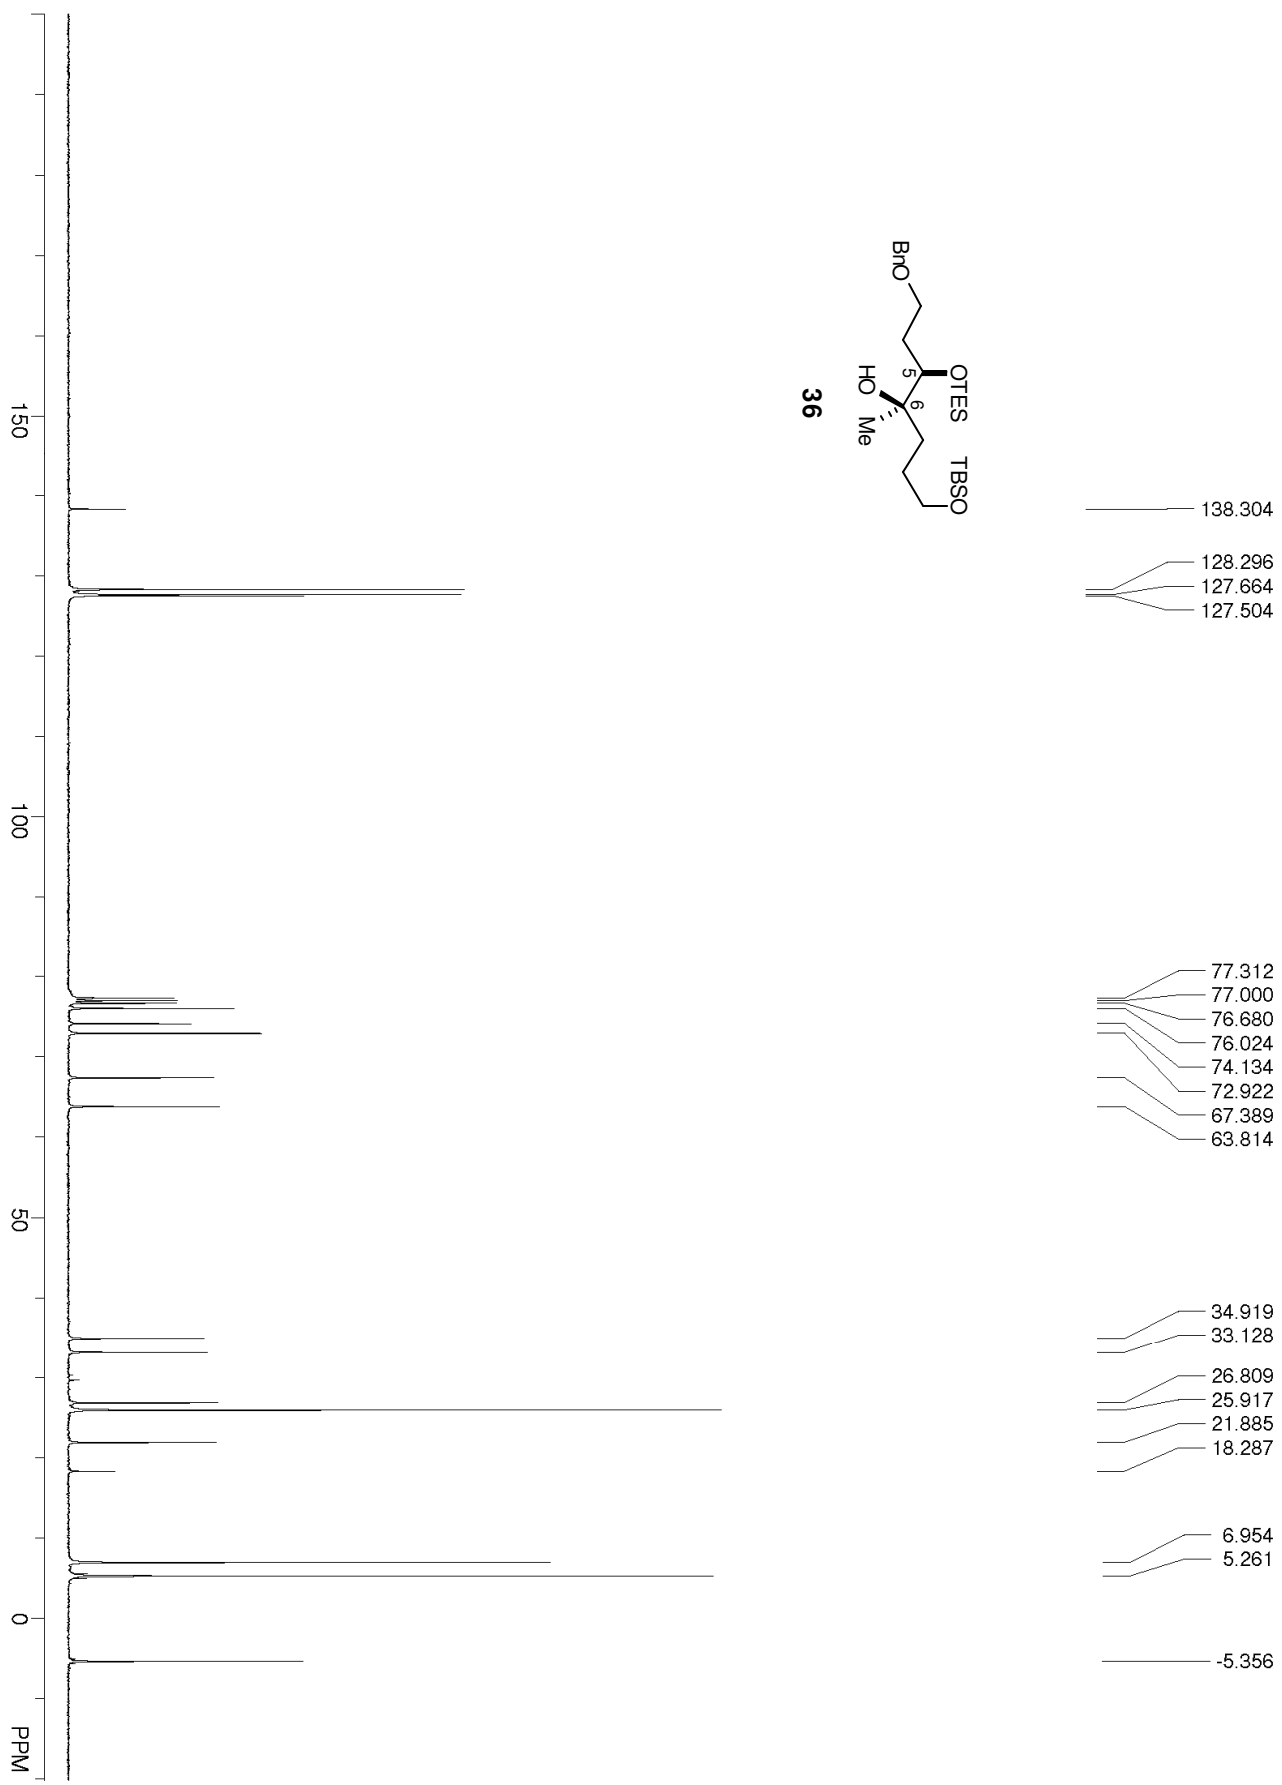



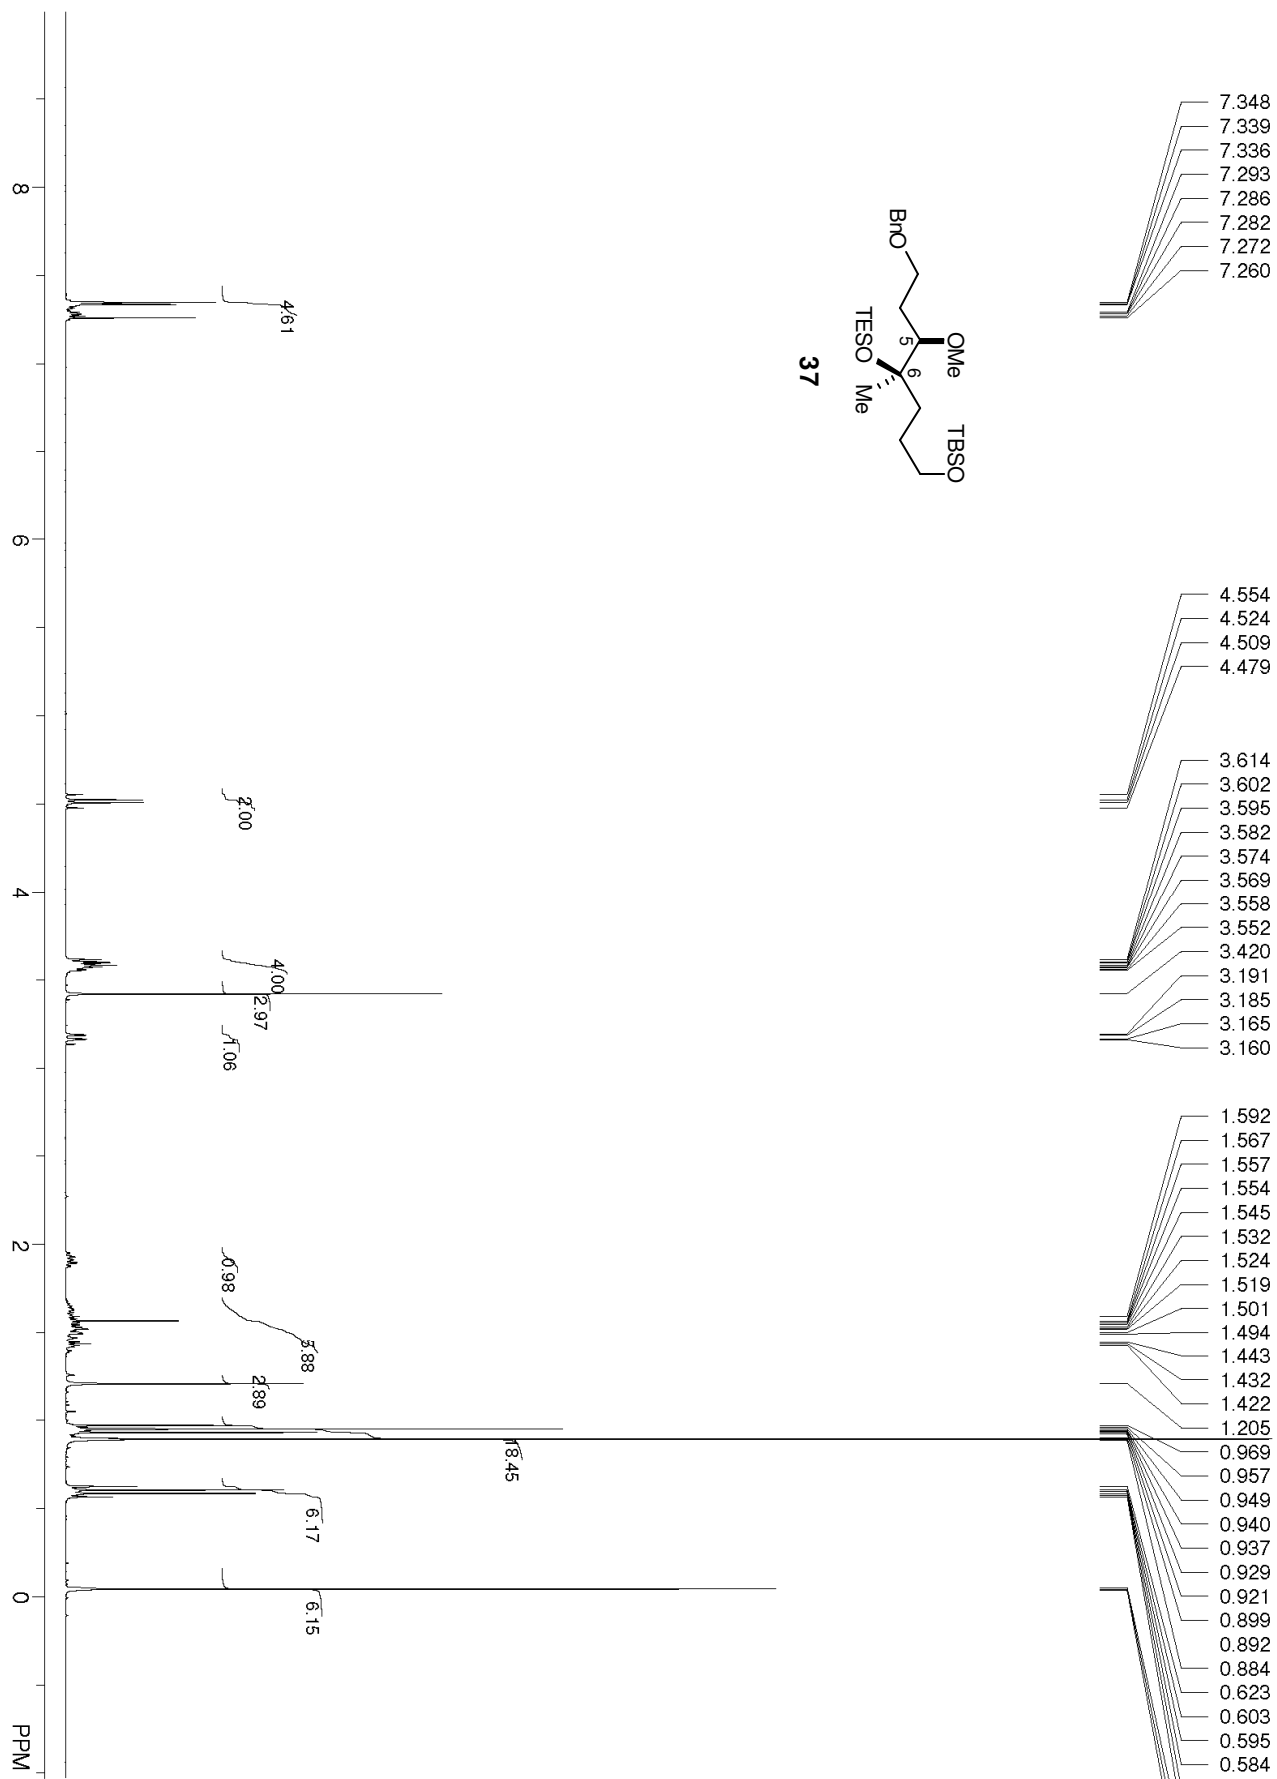

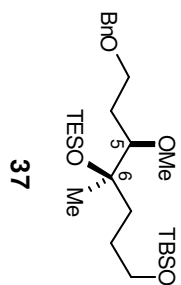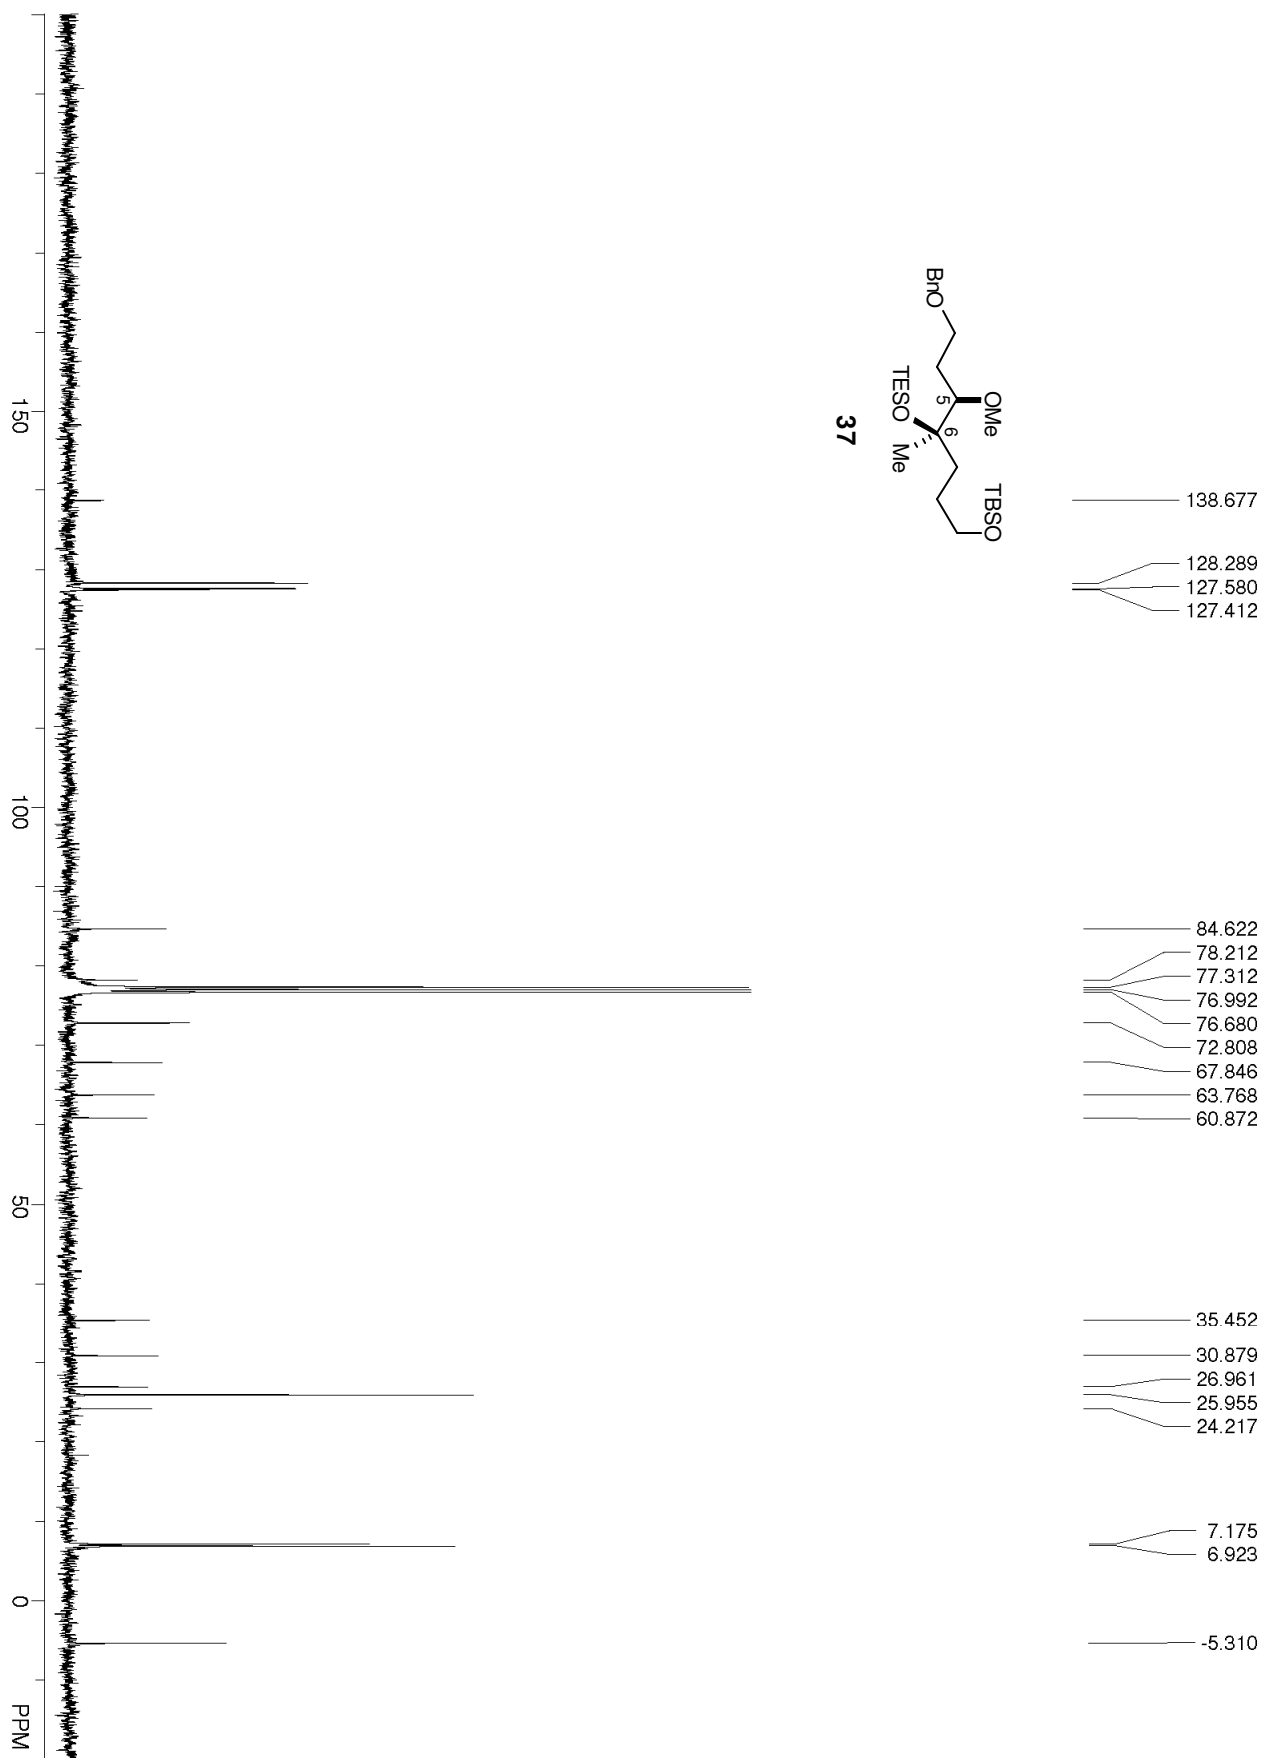

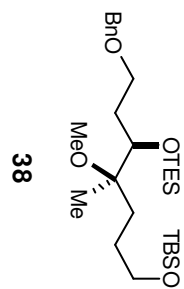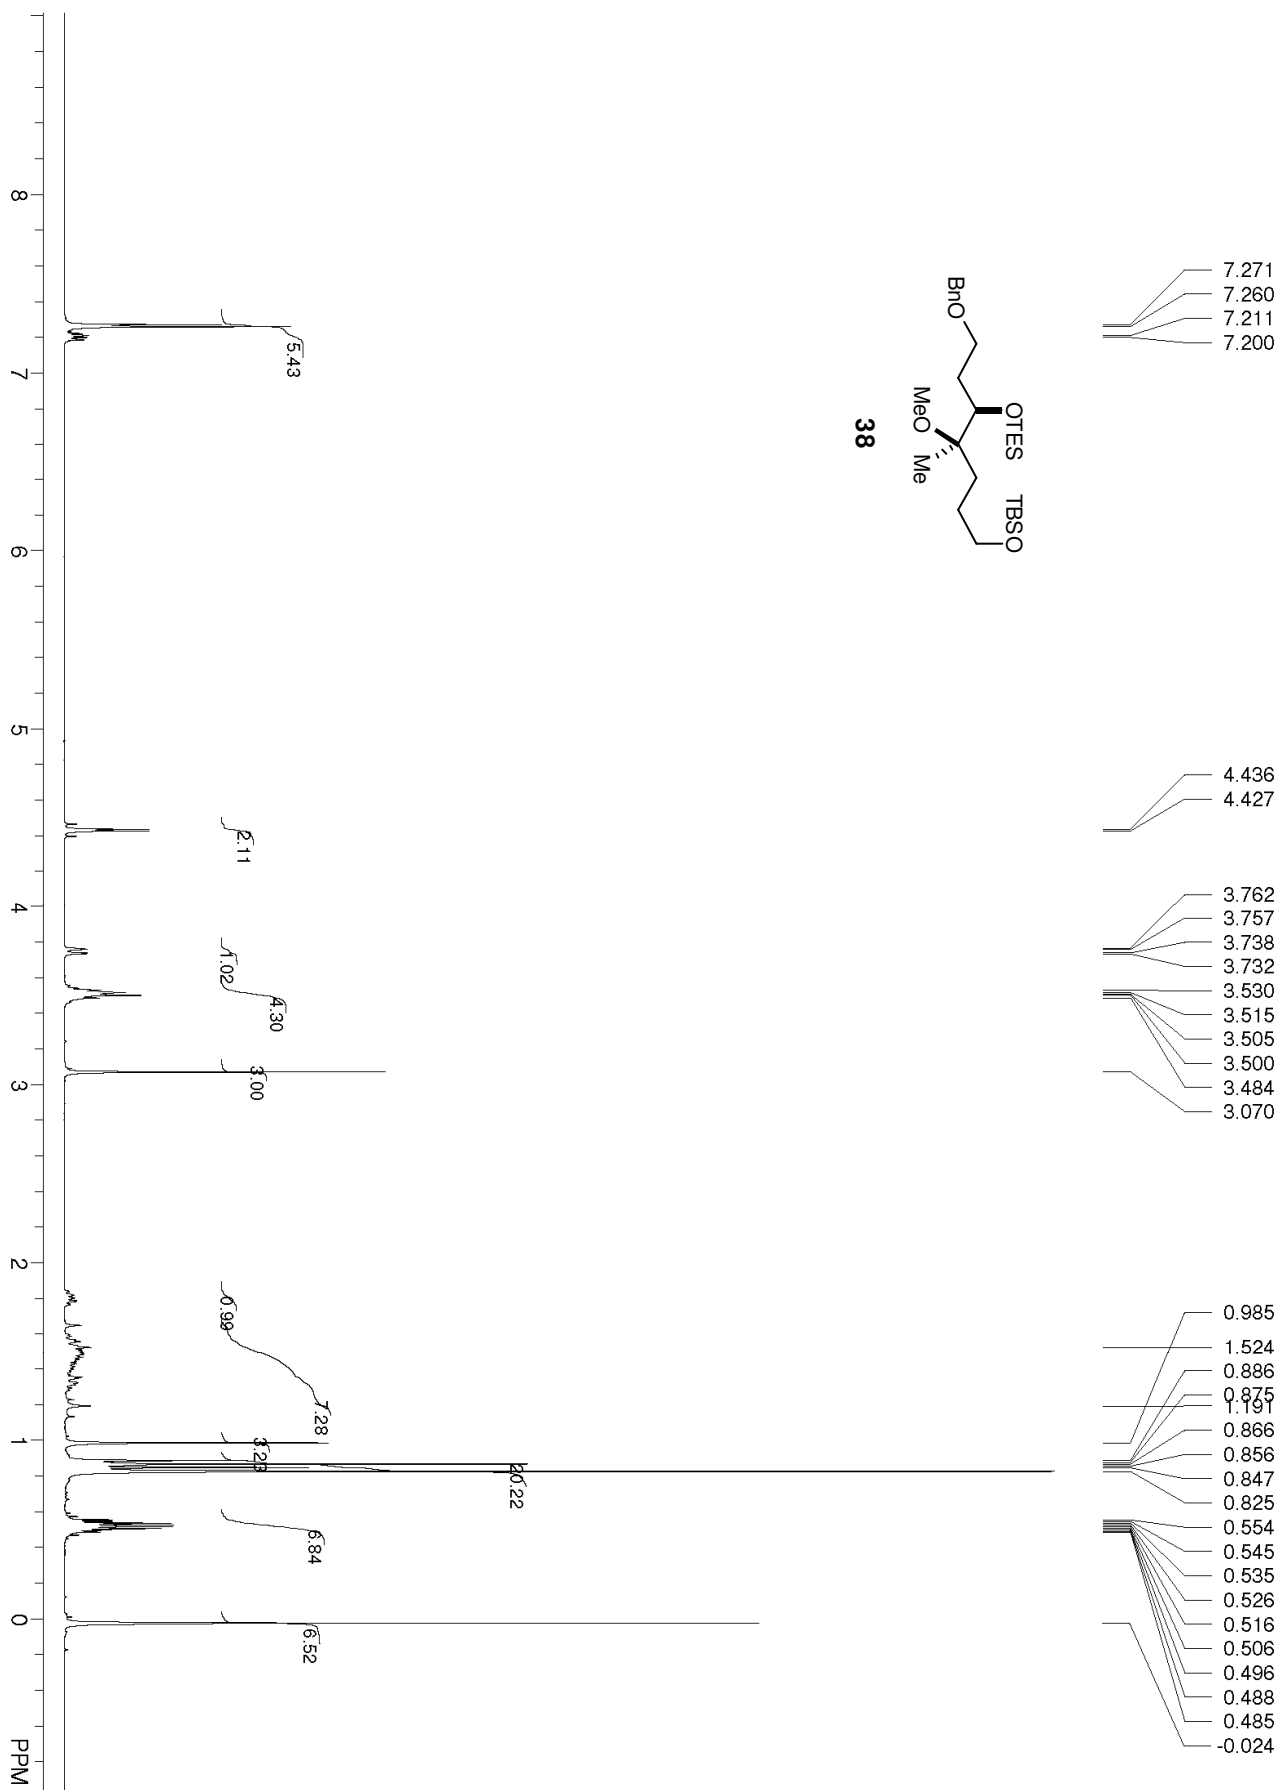

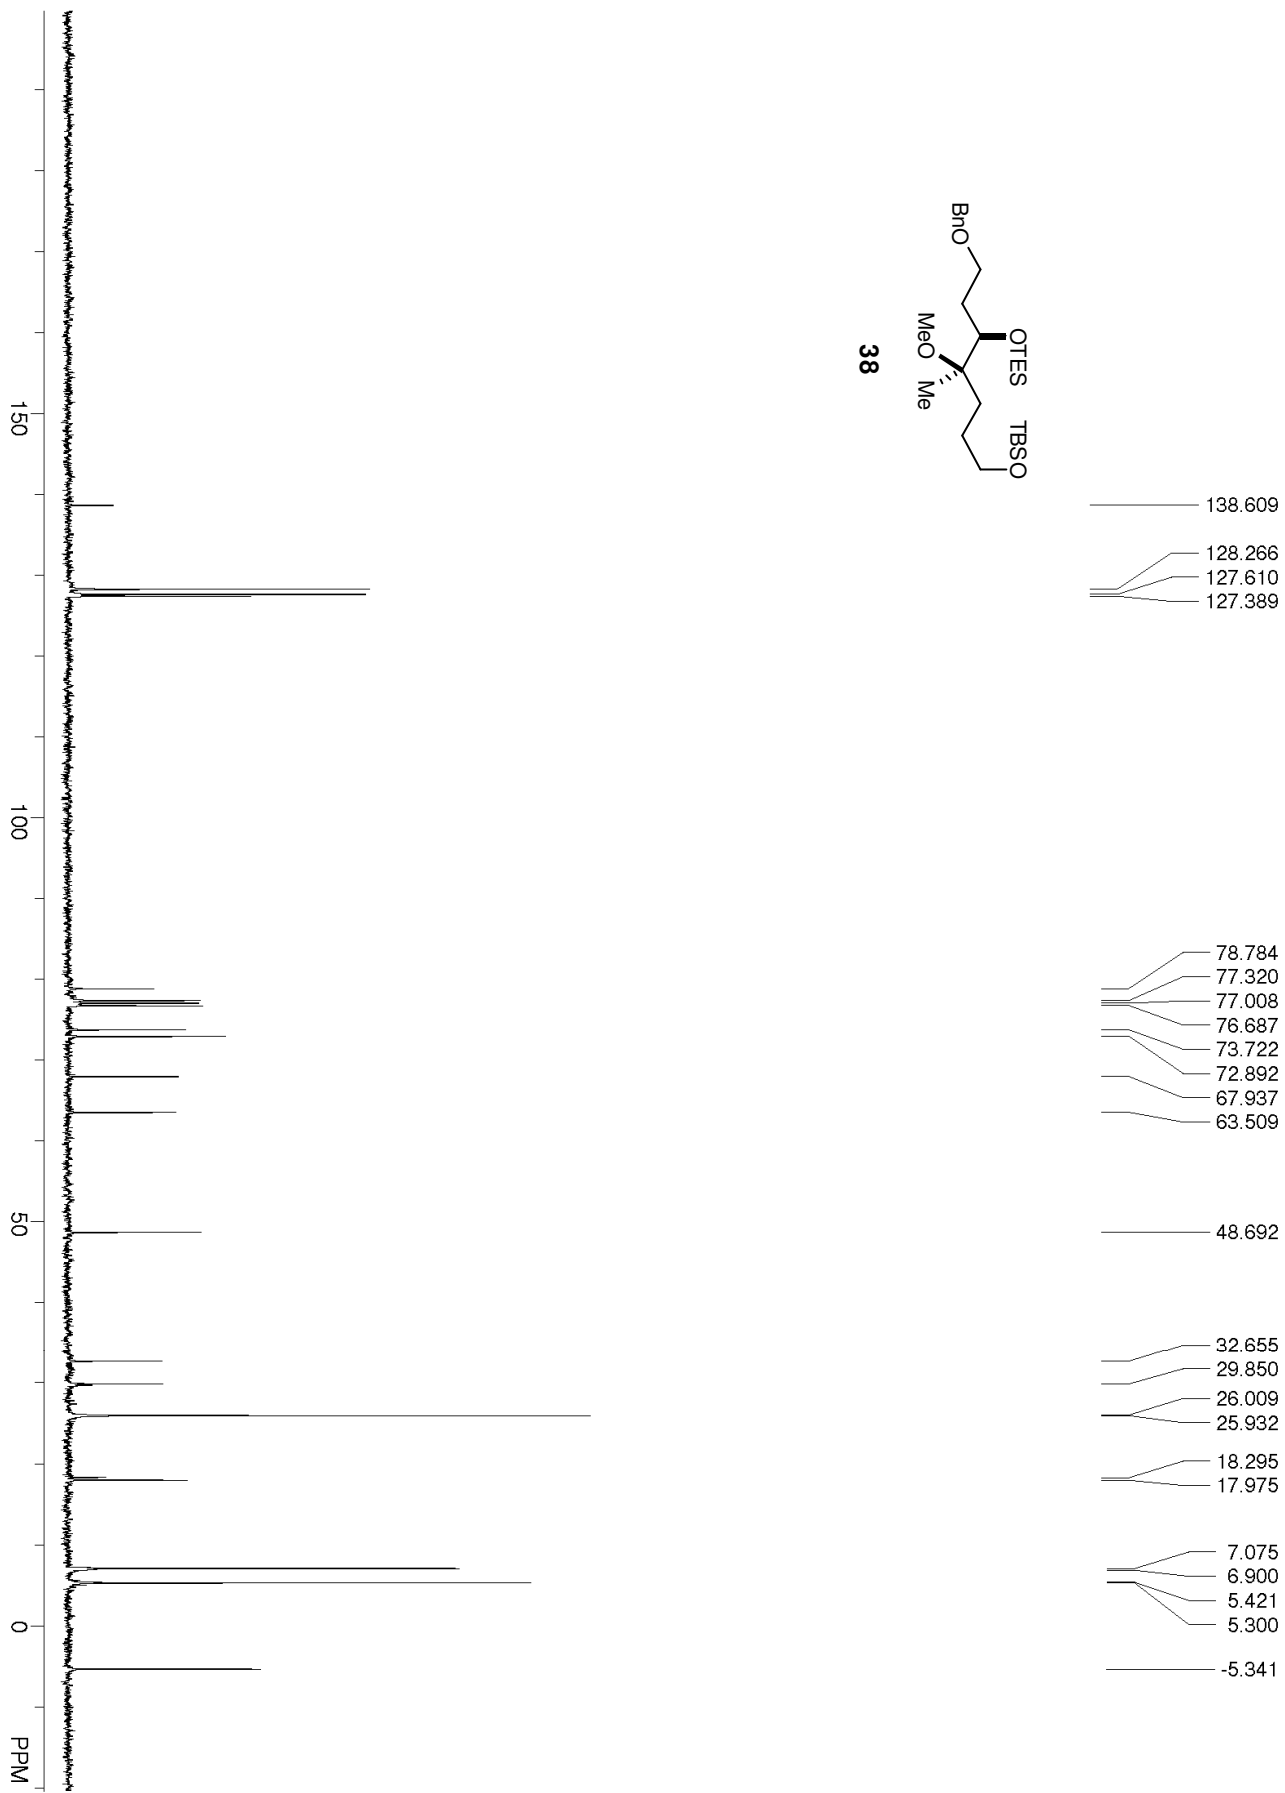

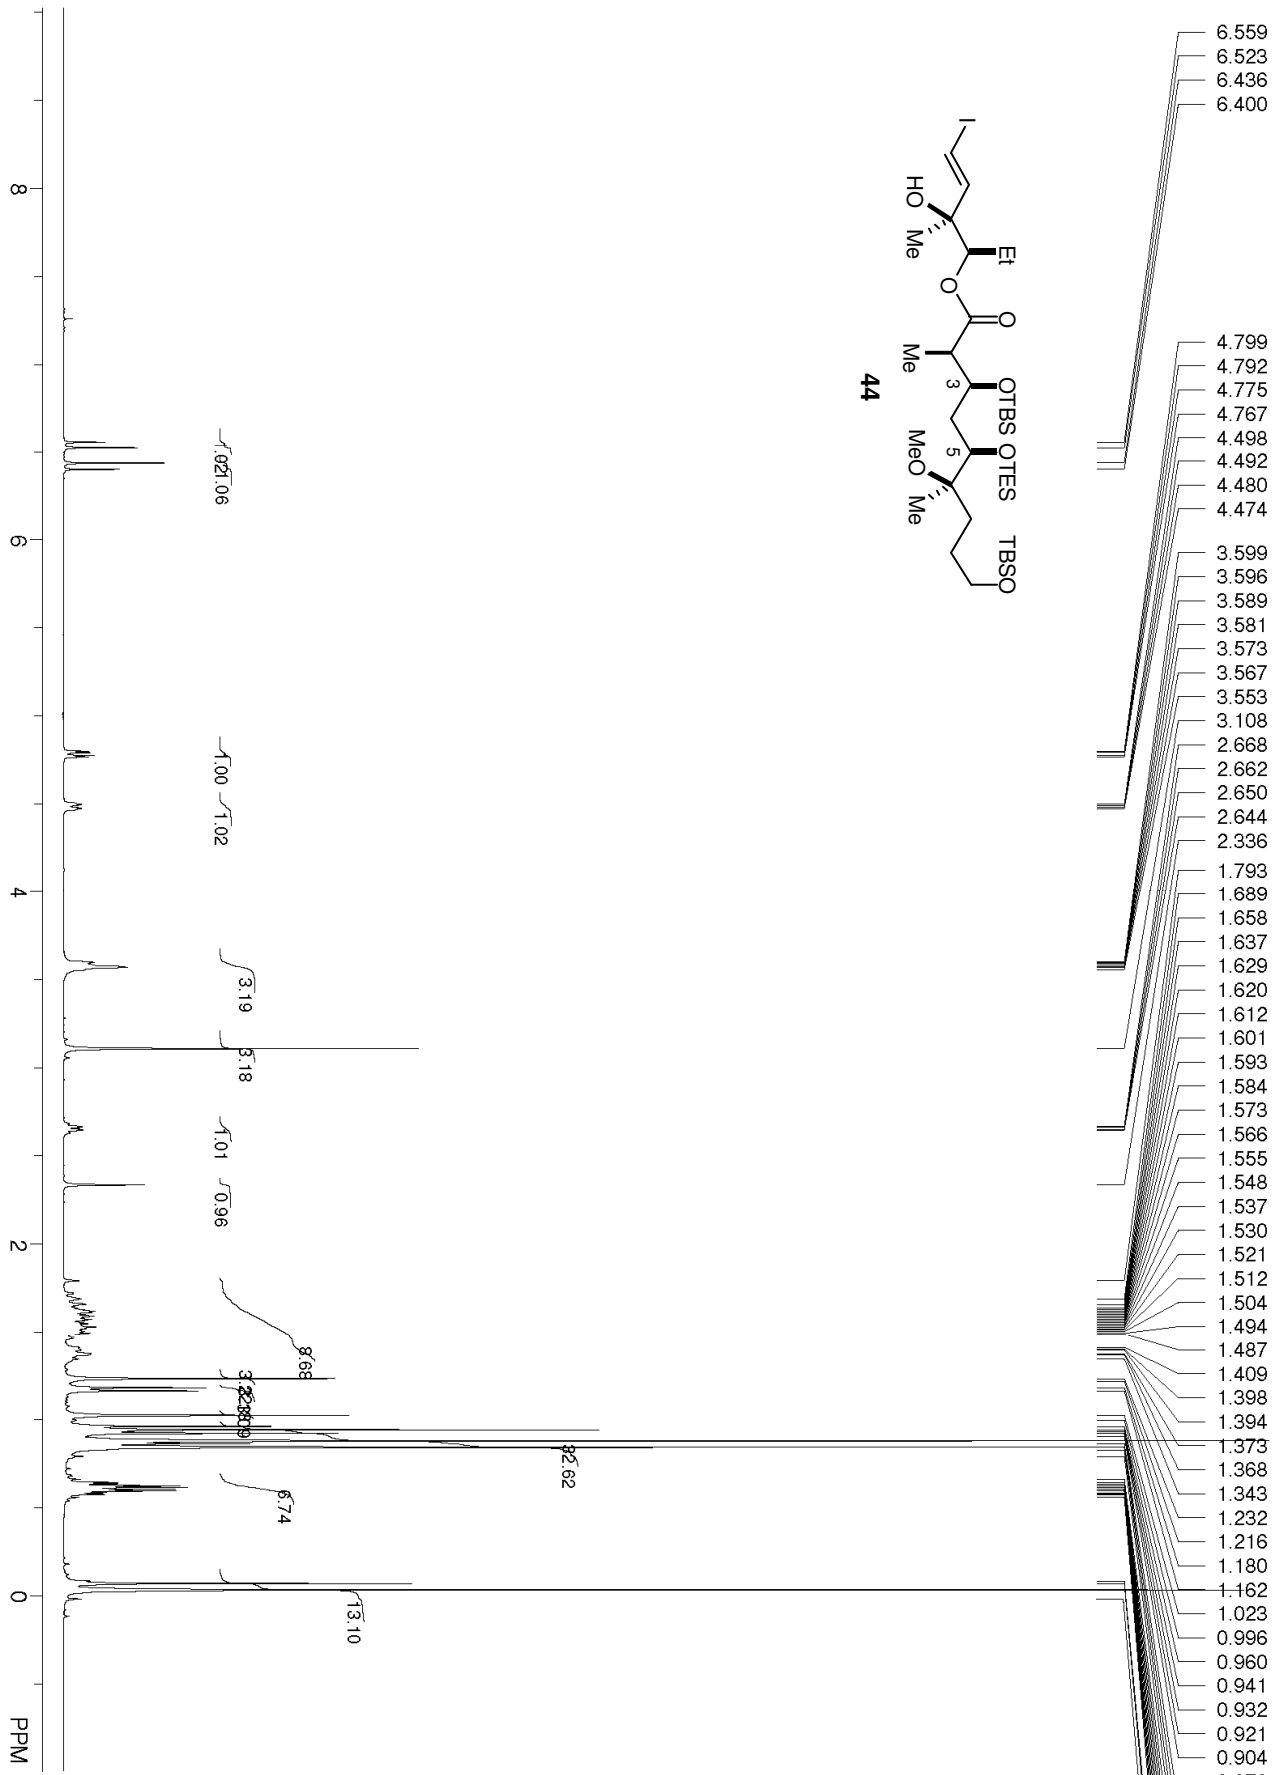

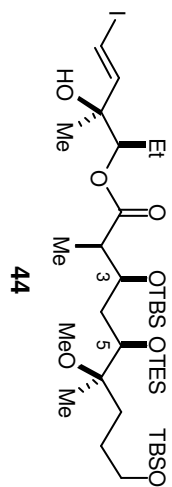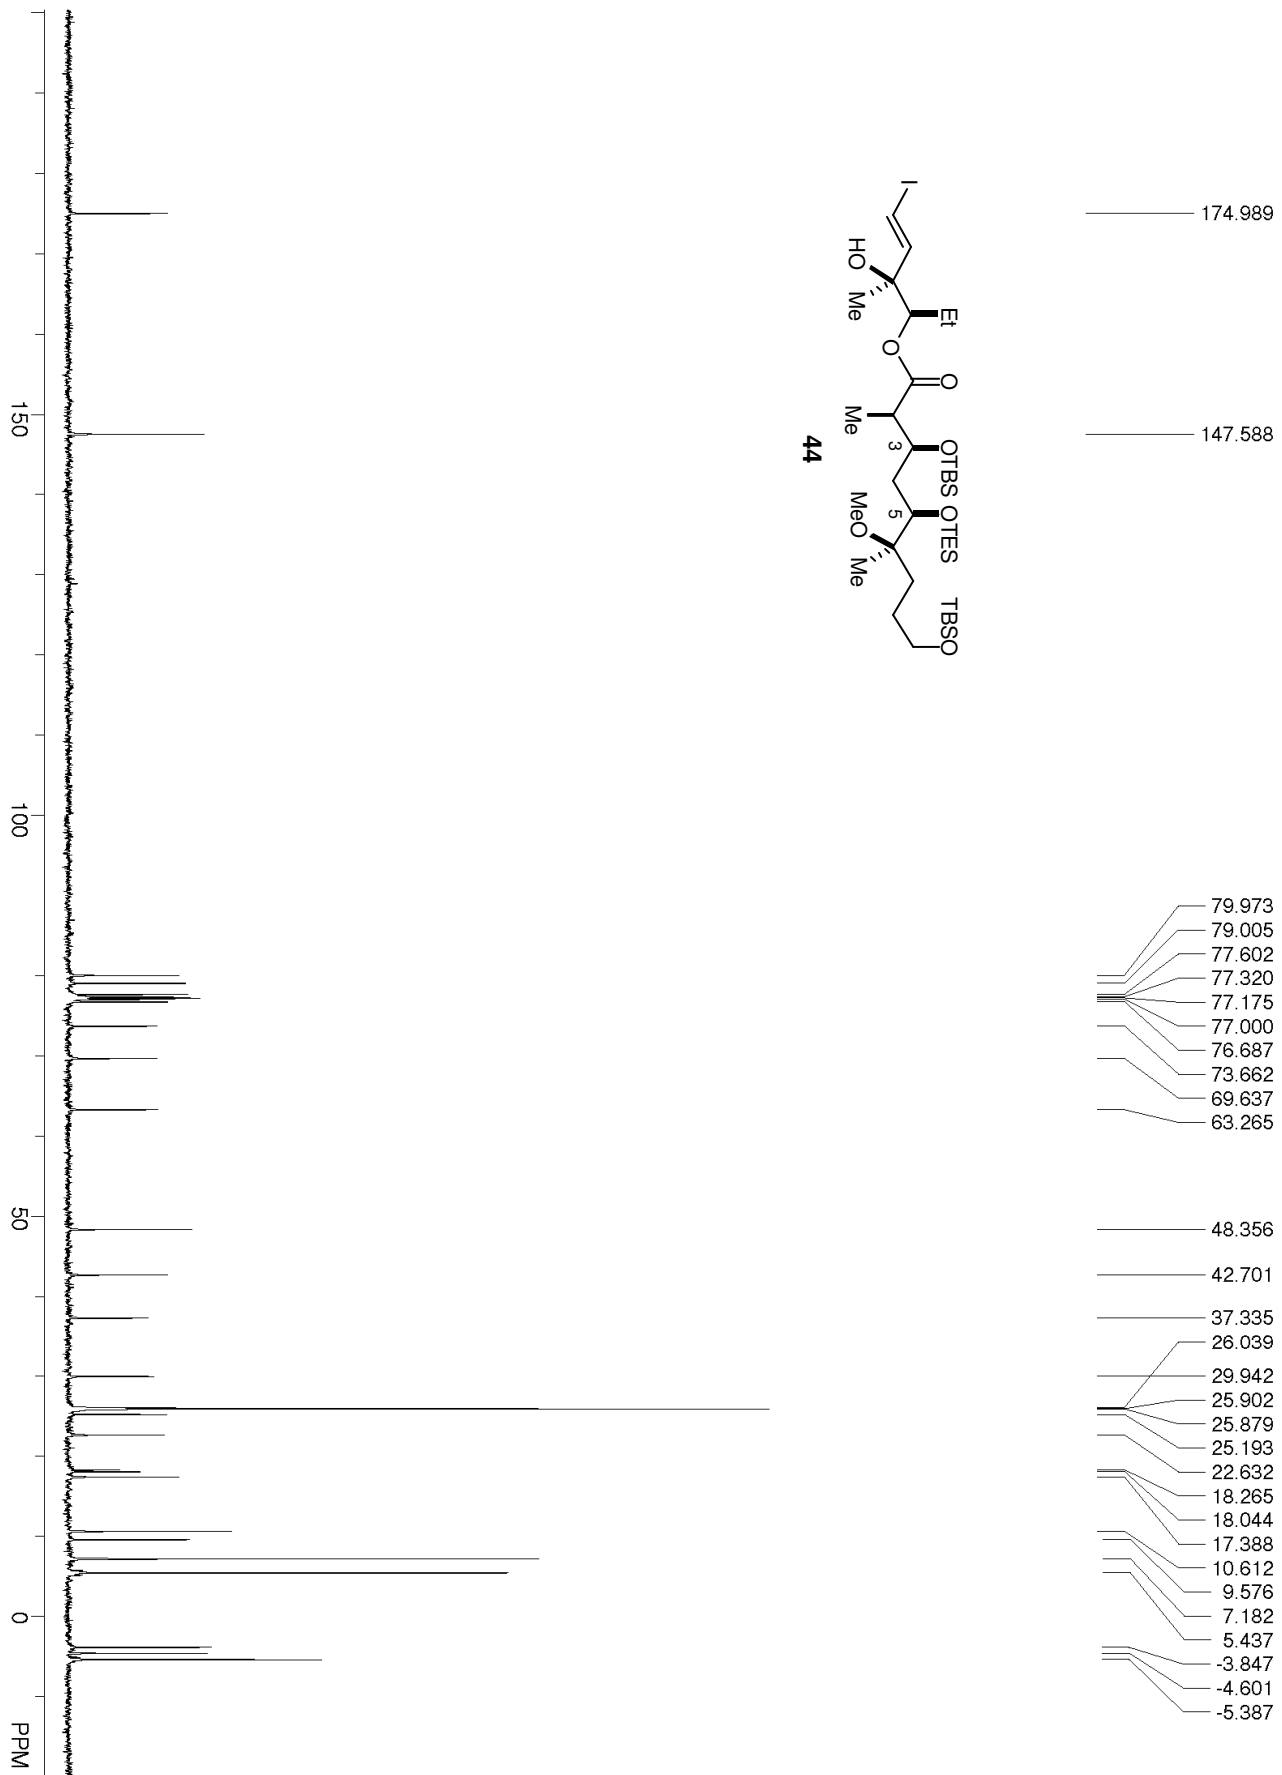



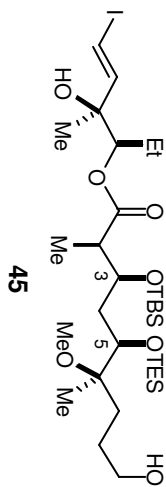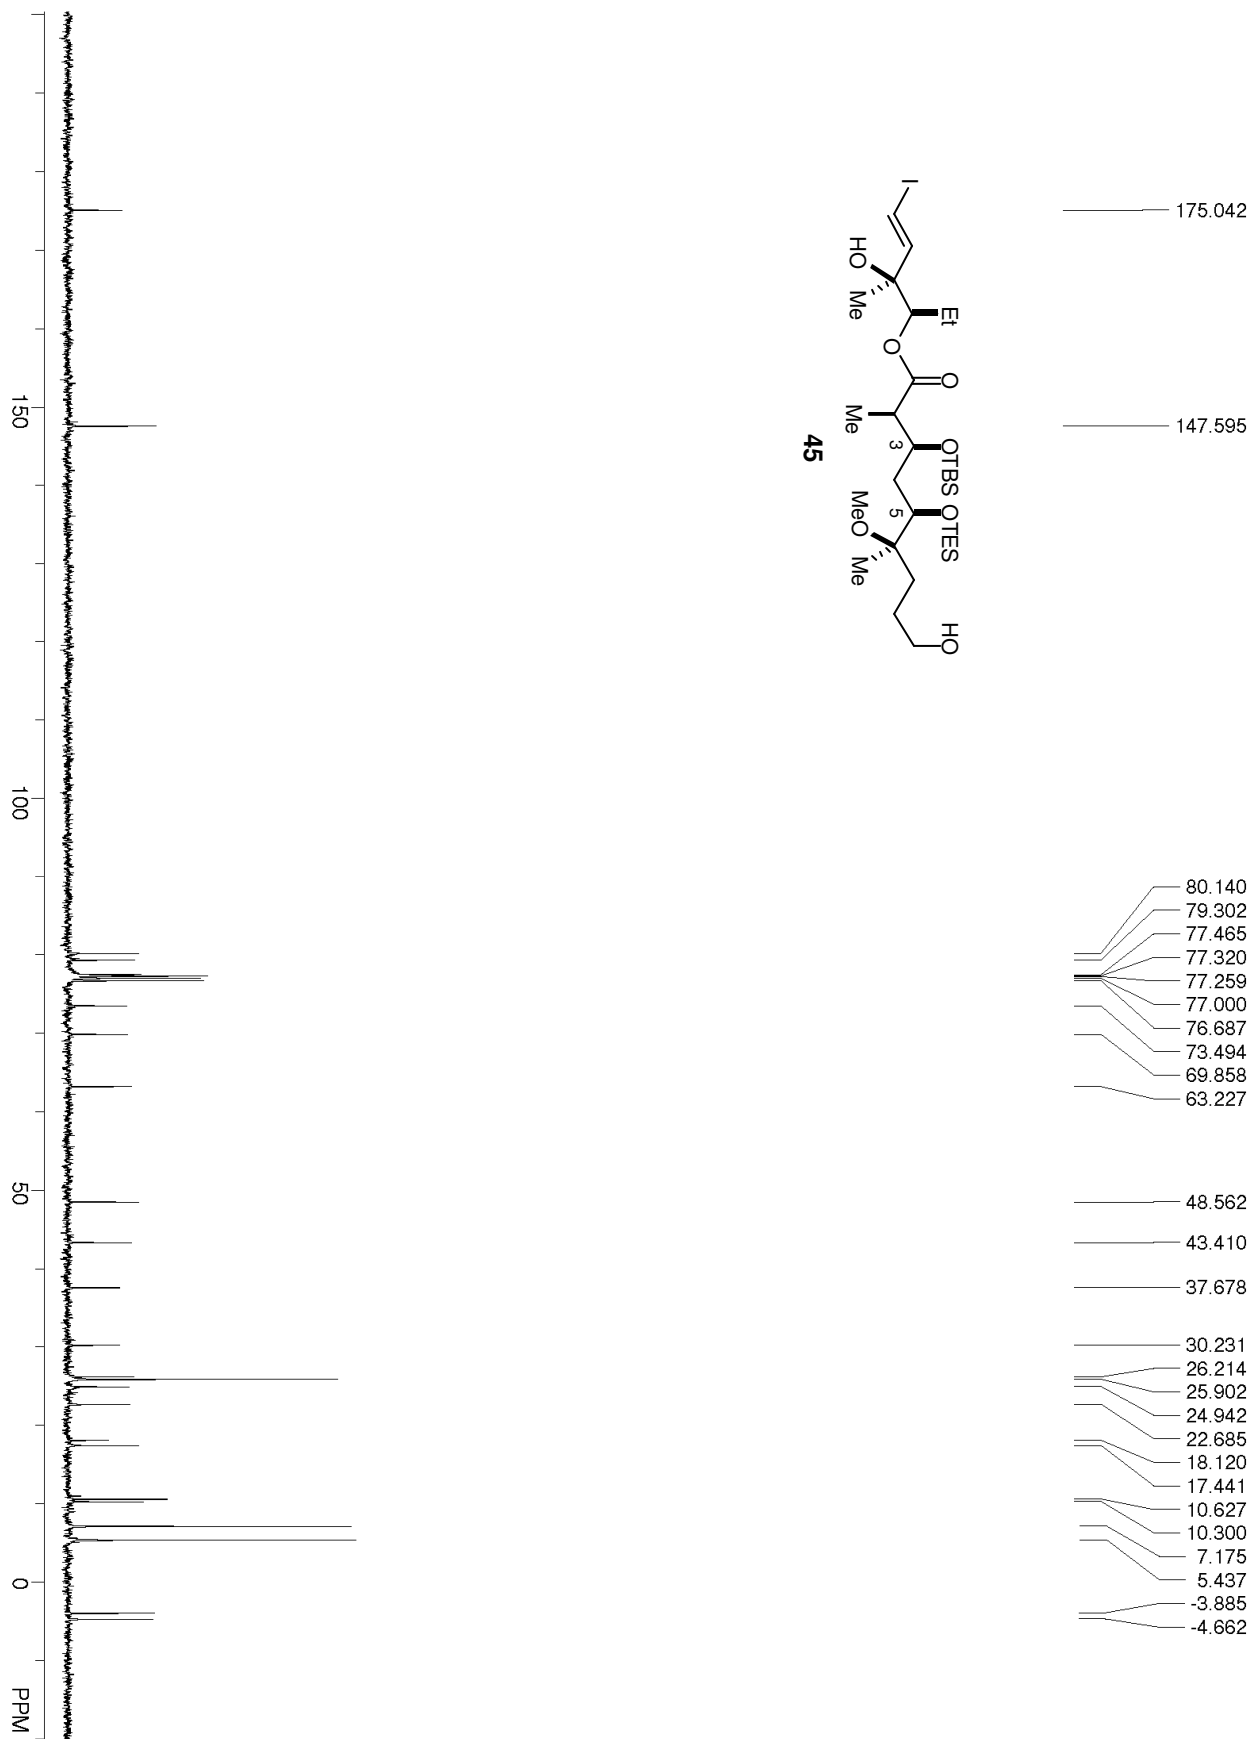



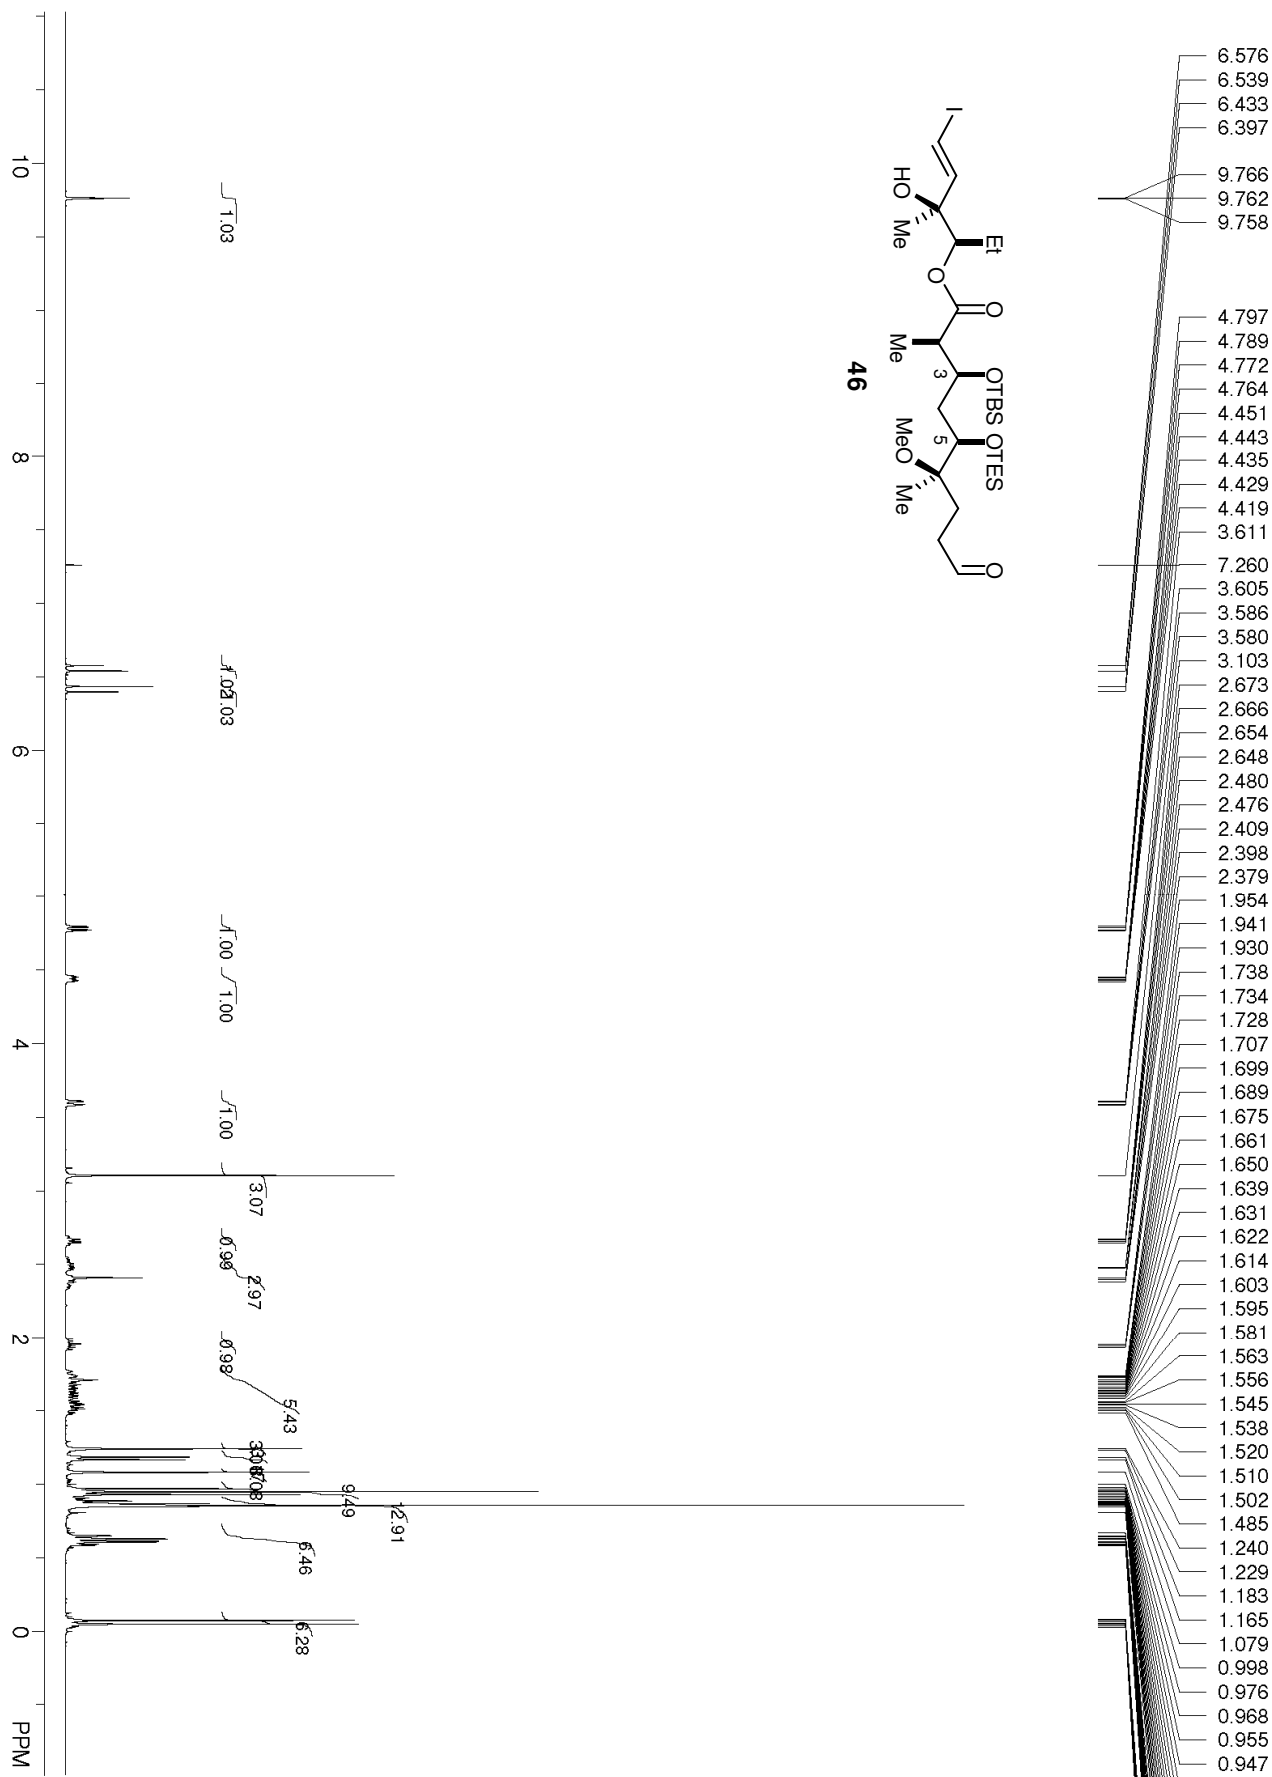

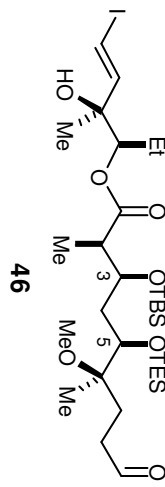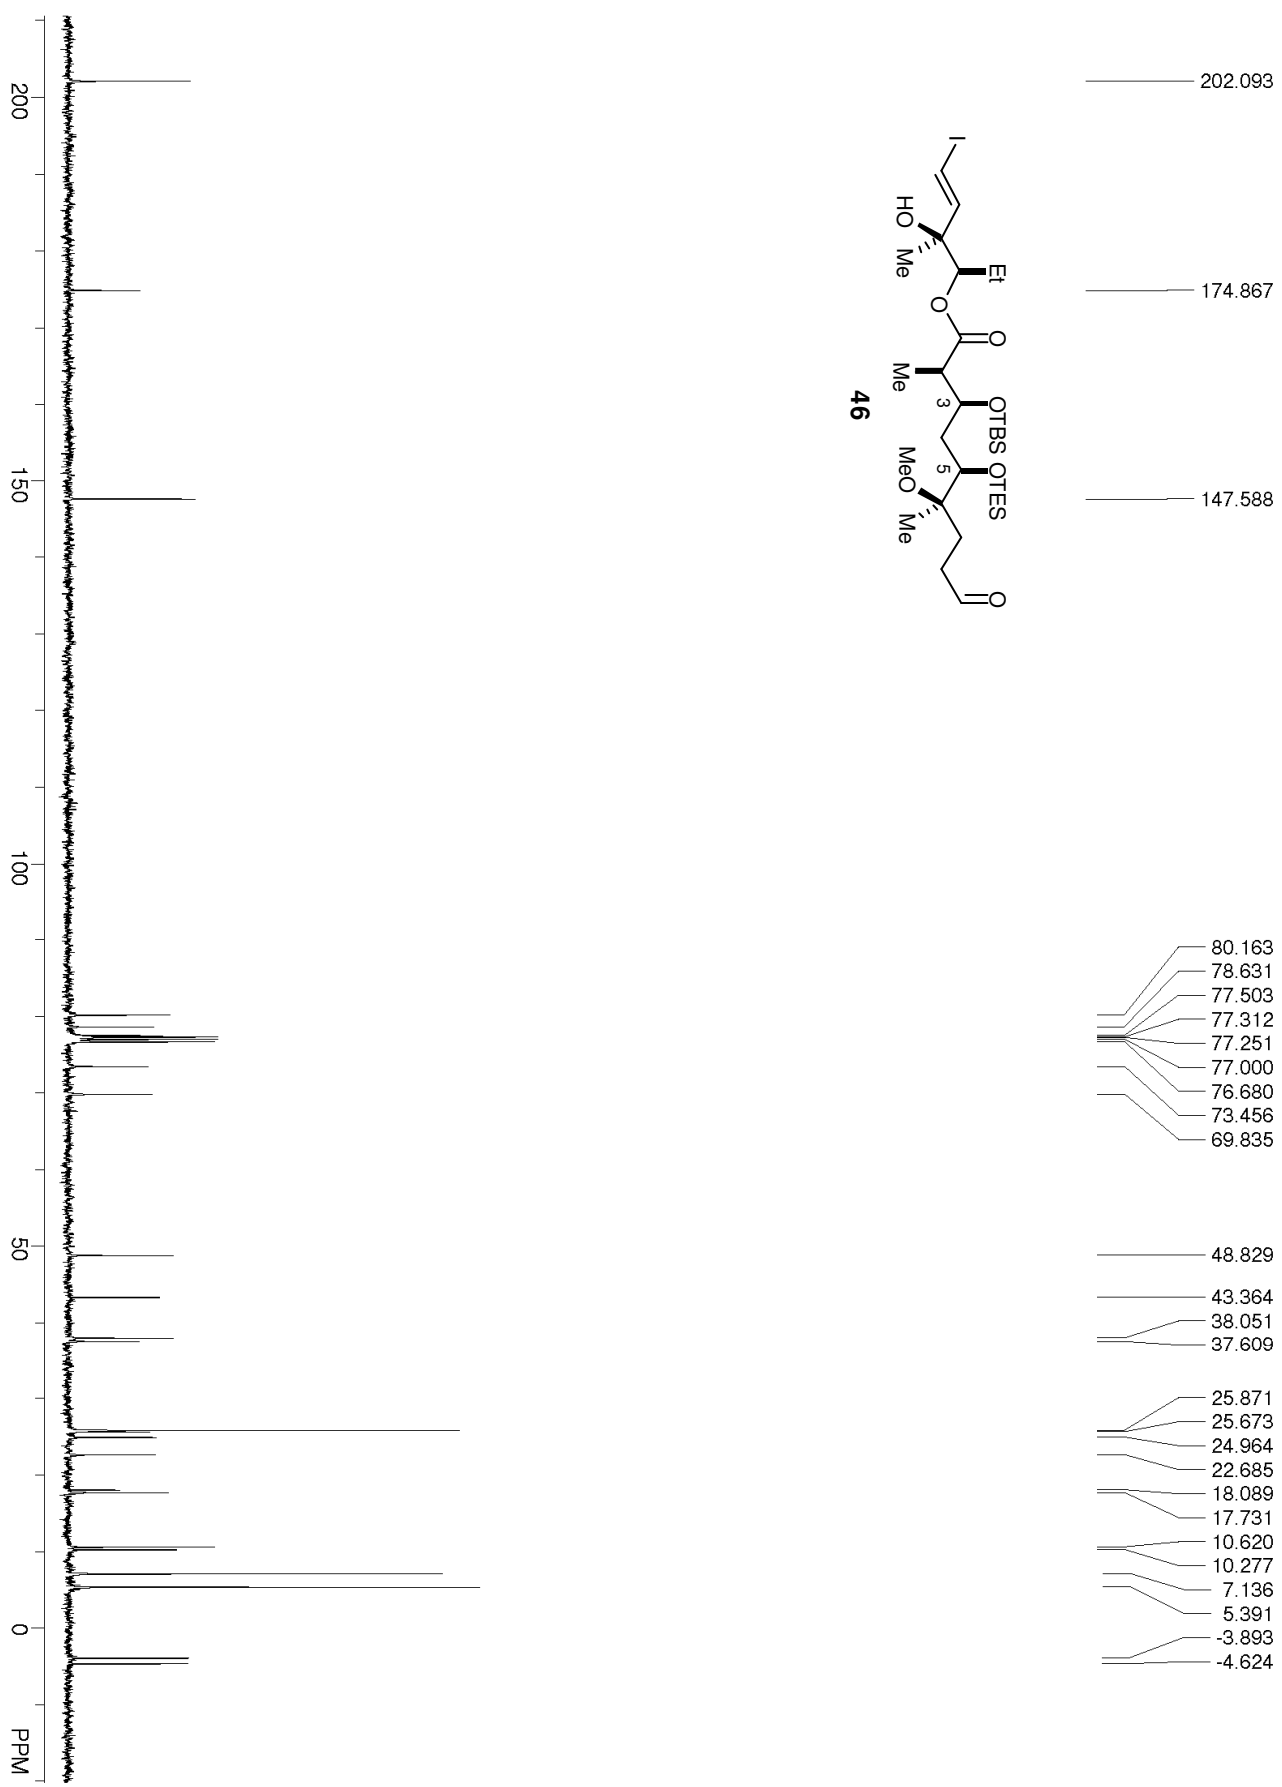

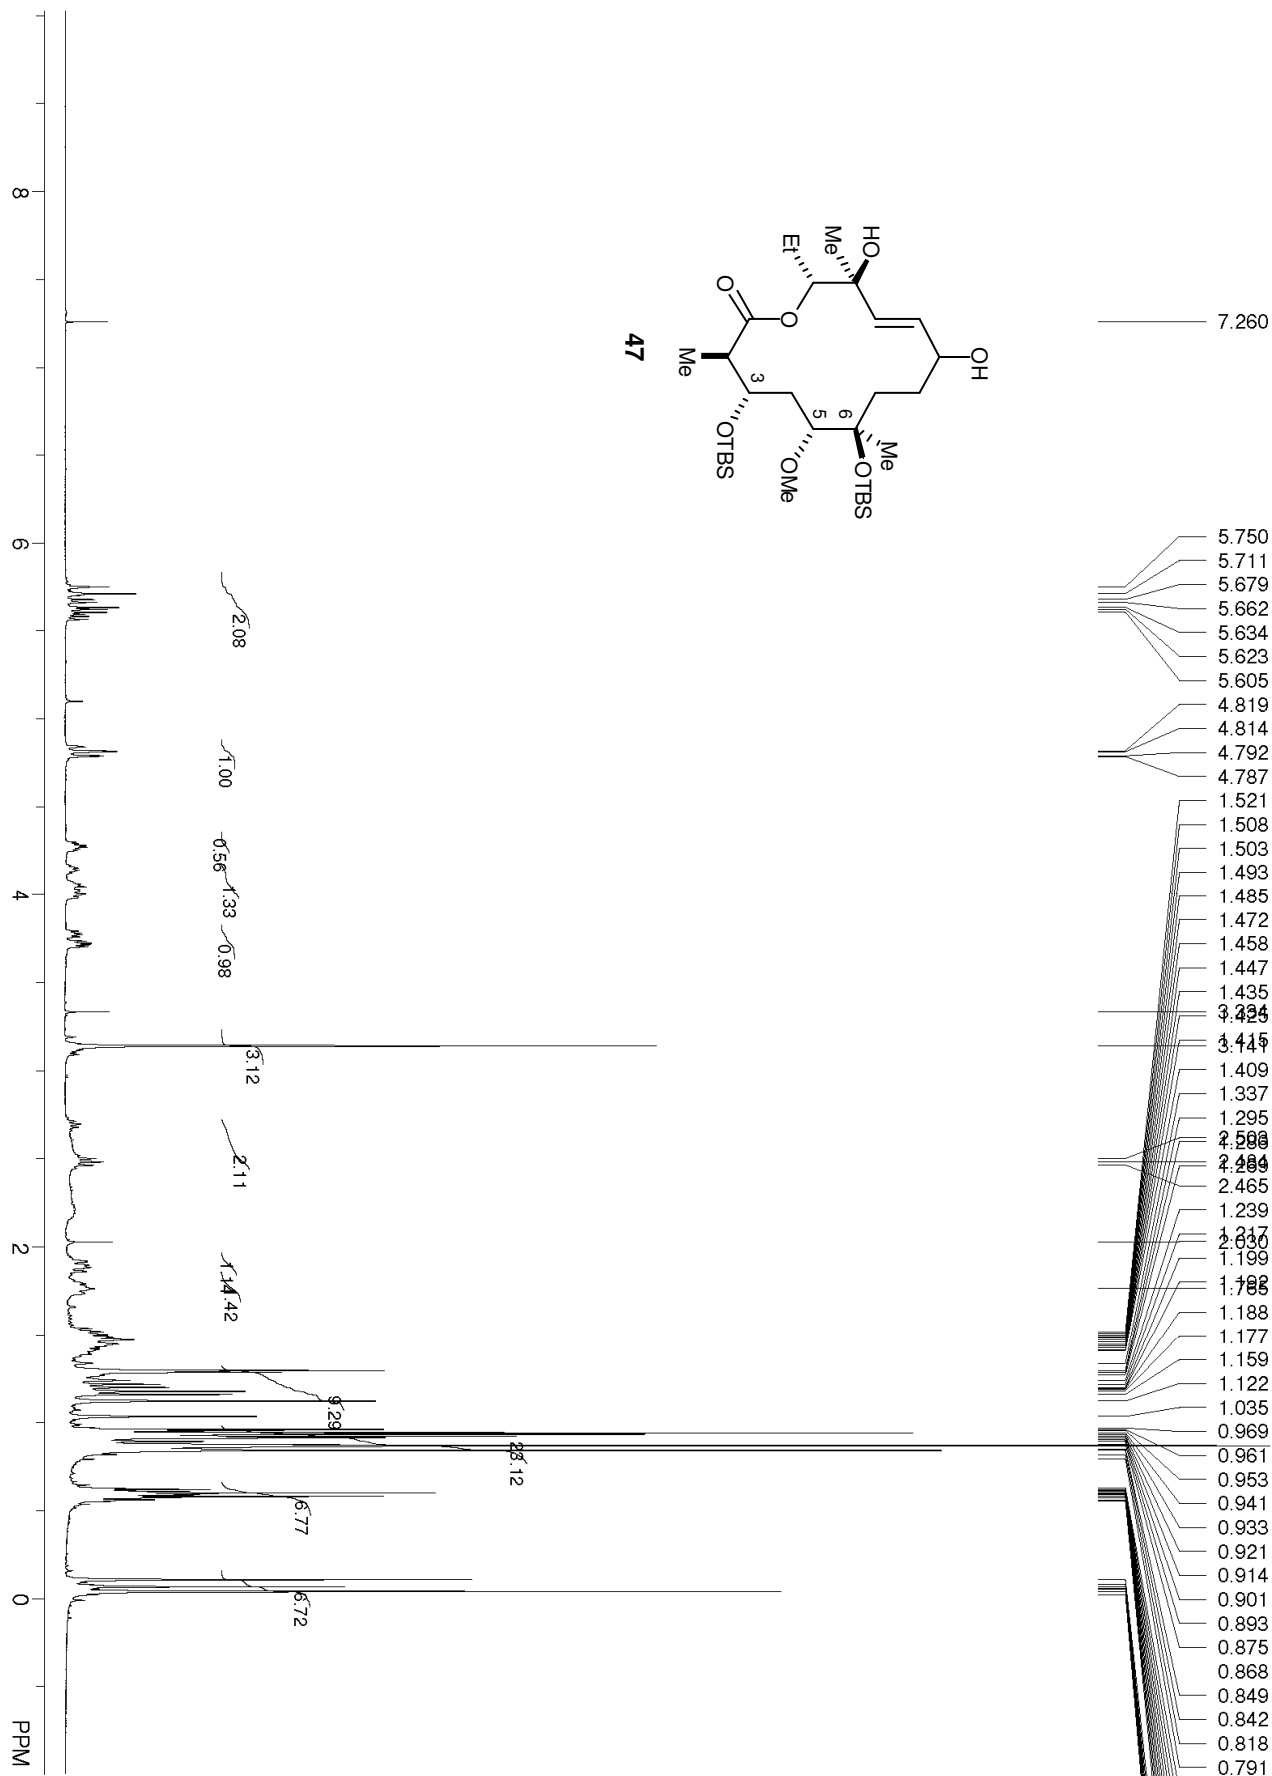

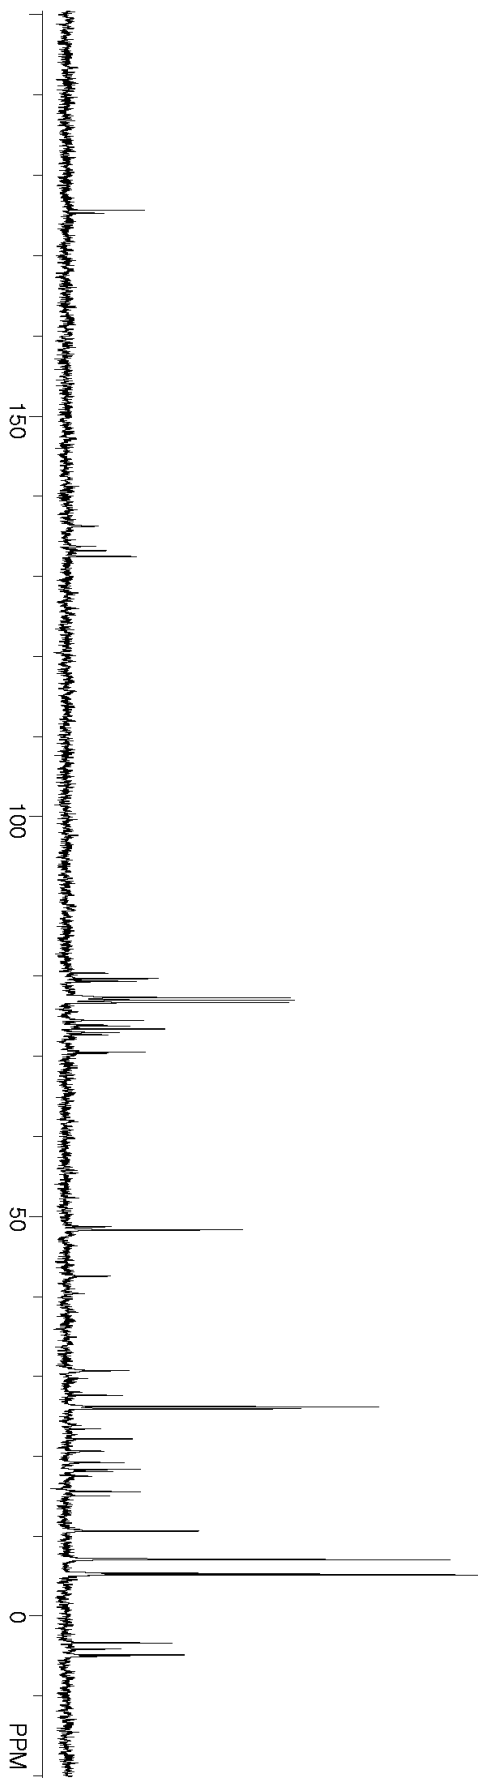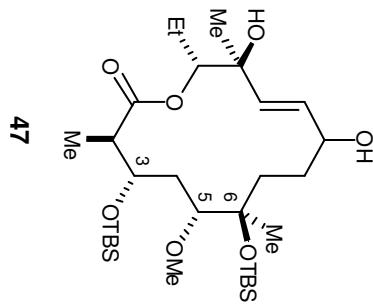

175.682  
175.317

136.223  
133.715  
133.182  
132.458

80.369  
79.675  
79.424  
79.294  
77.312  
76.992  
76.680  
74.462  
73.898  
73.776  
73.395  
72.945  
72.663  
70.498  
70.369  
48.722  
48.326  
42.564  
40.384  
30.658  
30.567  
29.644  
27.563  
26.146  
25.864  
23.356  
22.114  
20.574  
19.164  
18.287  
18.051  
17.449  
15.521  
14.995  
10.635  
10.589  
7.098  
7.014  
5.307  
5.117  
-3.390

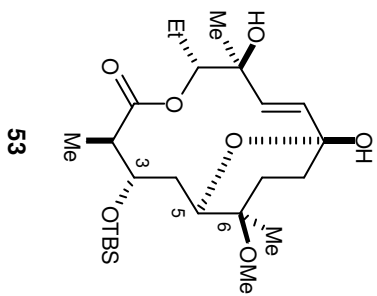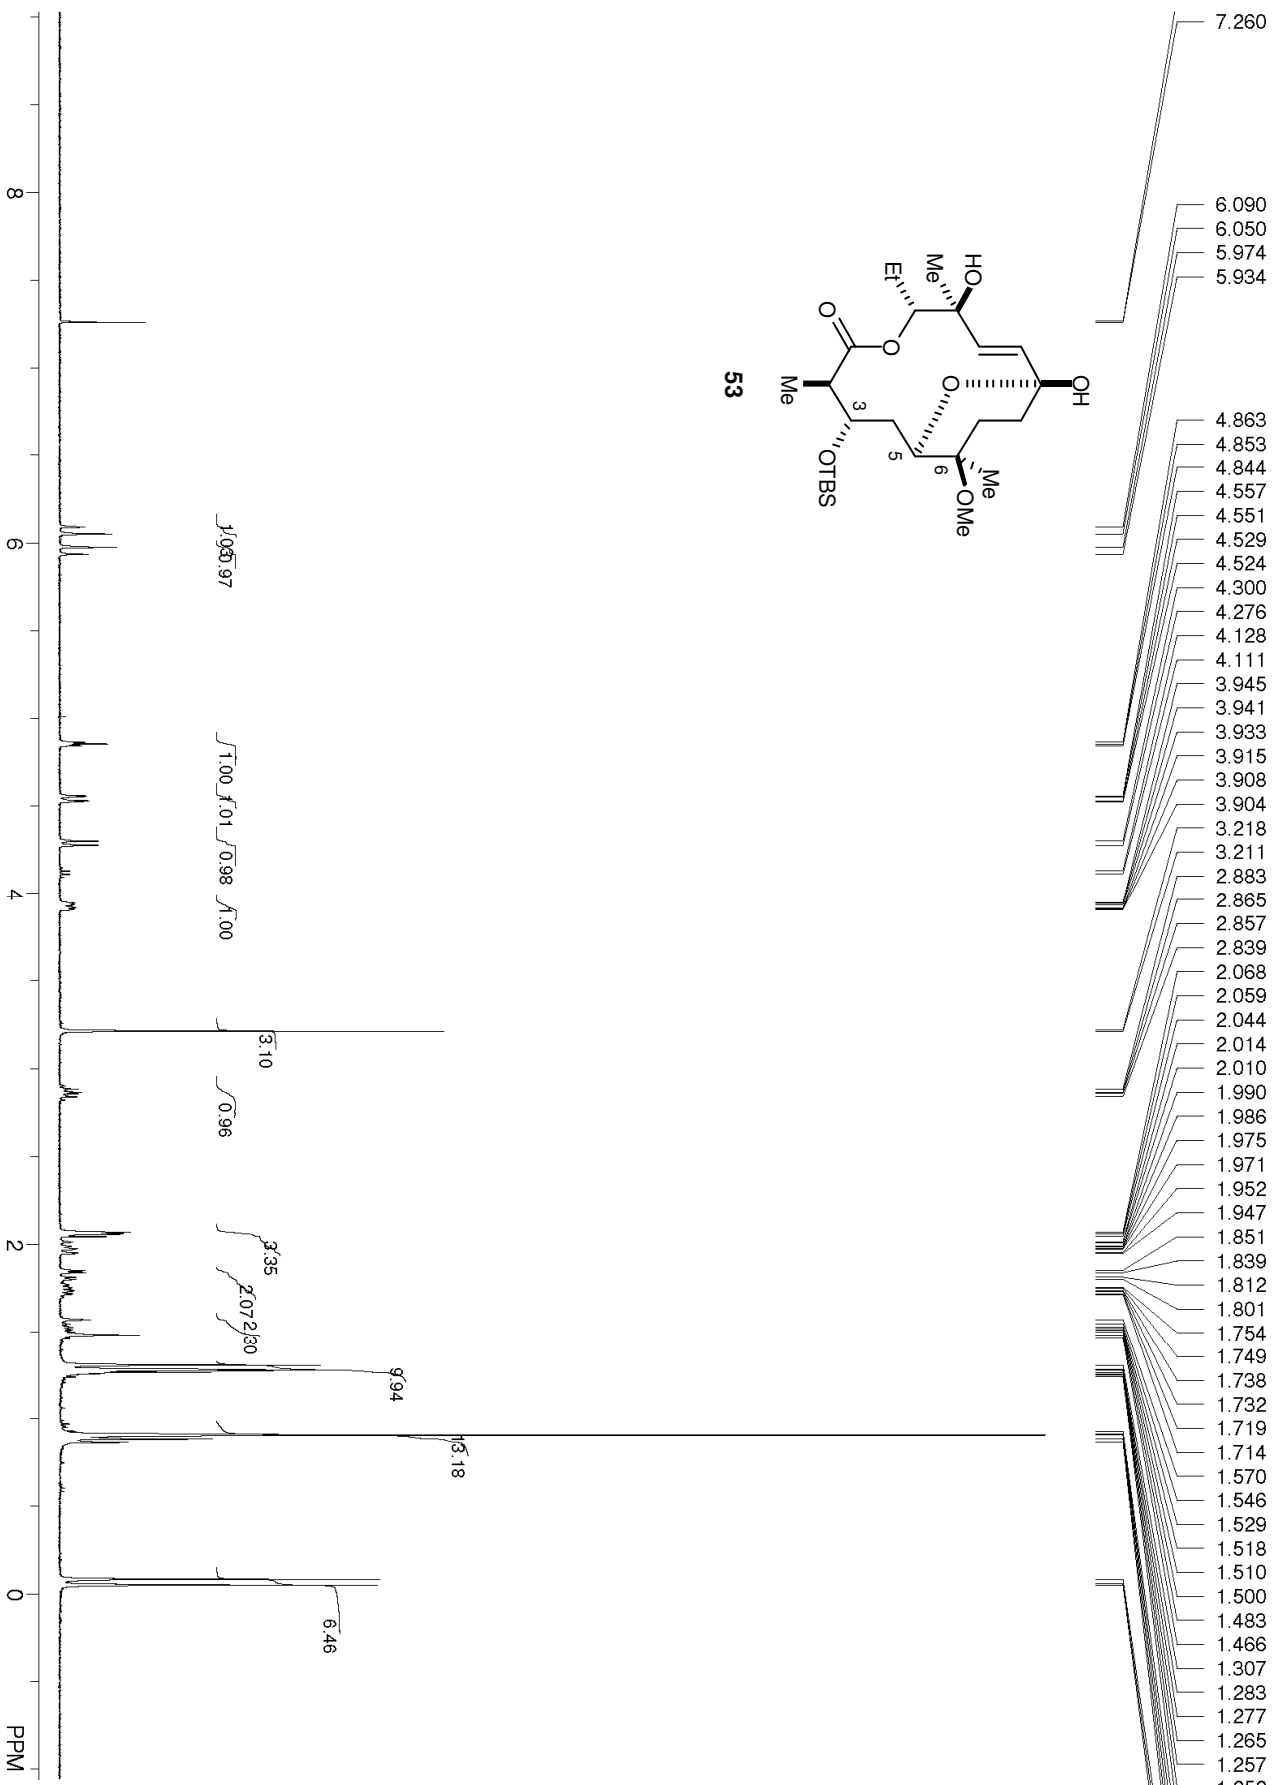

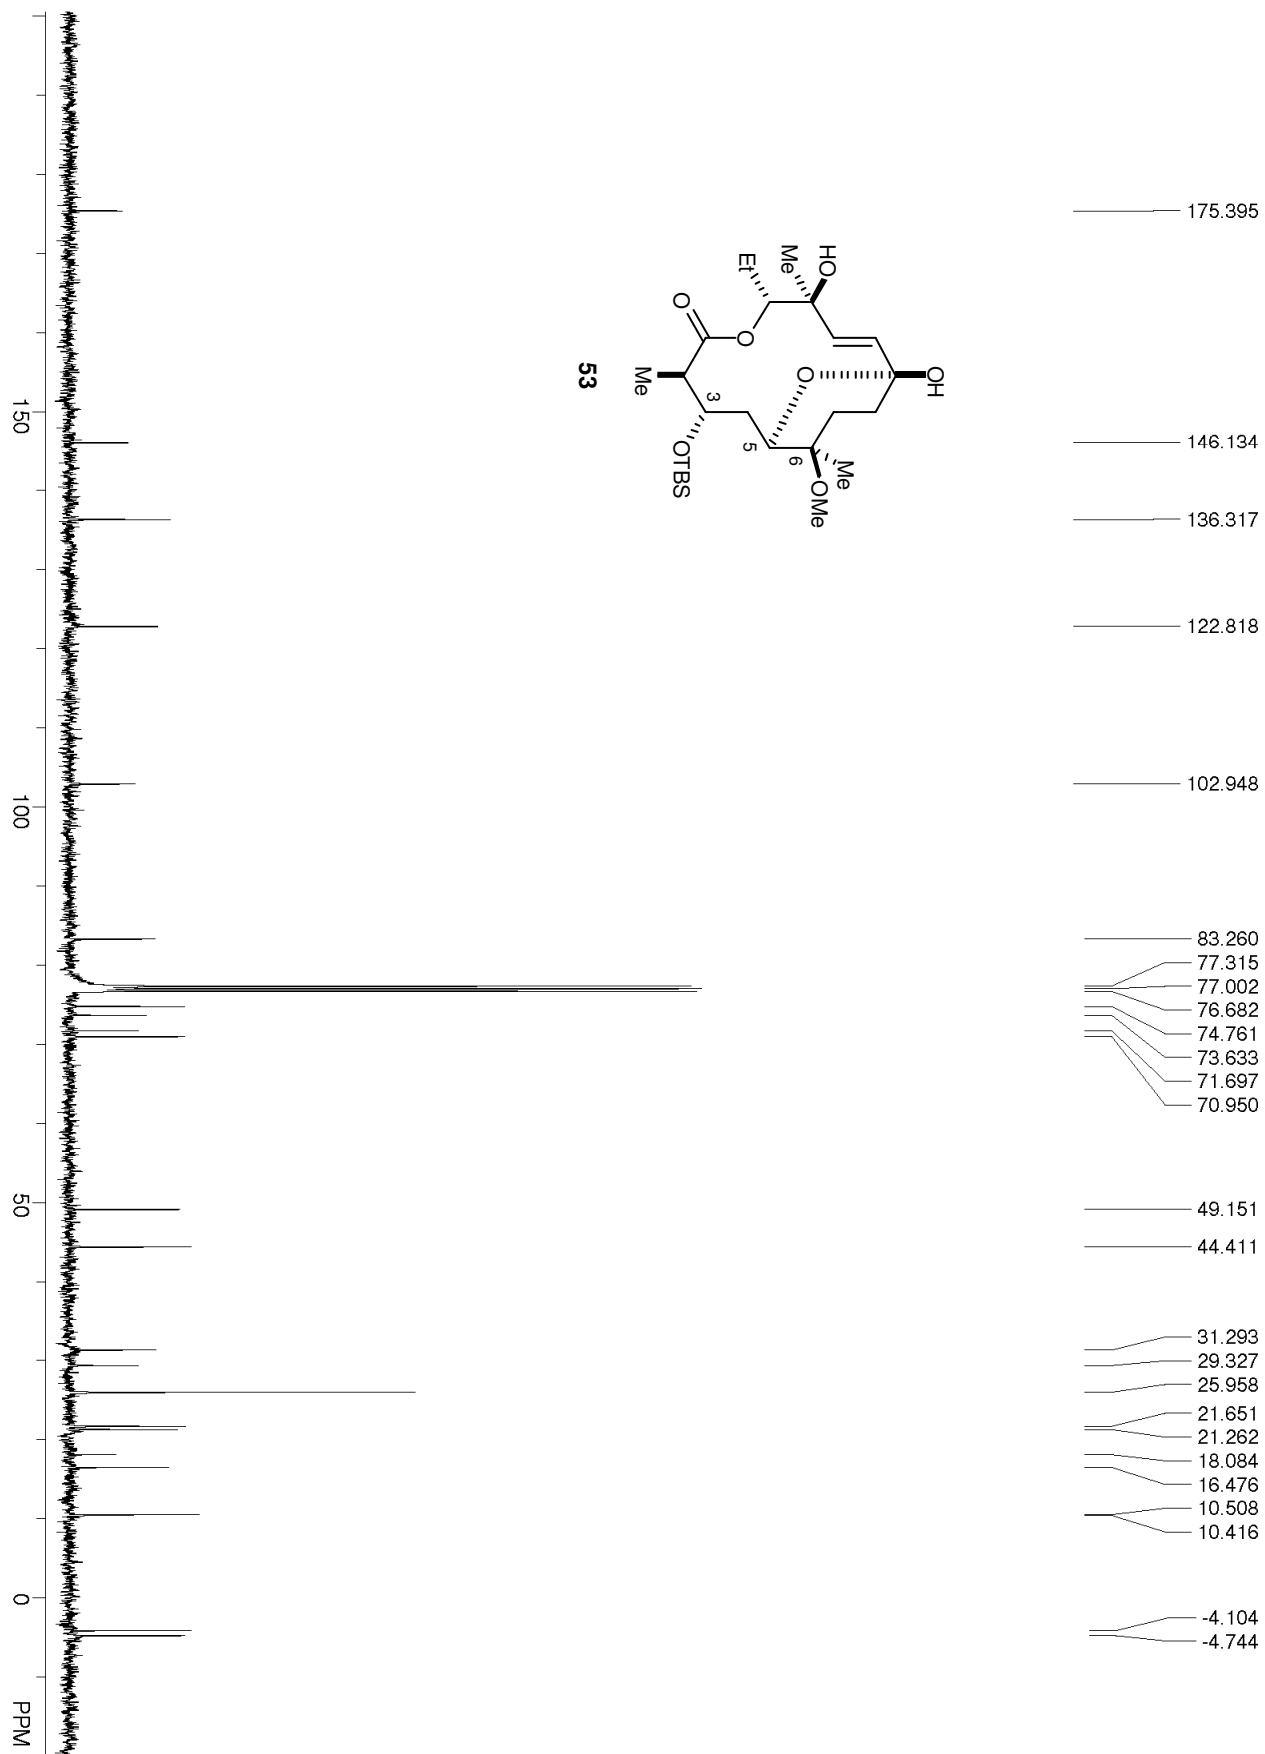

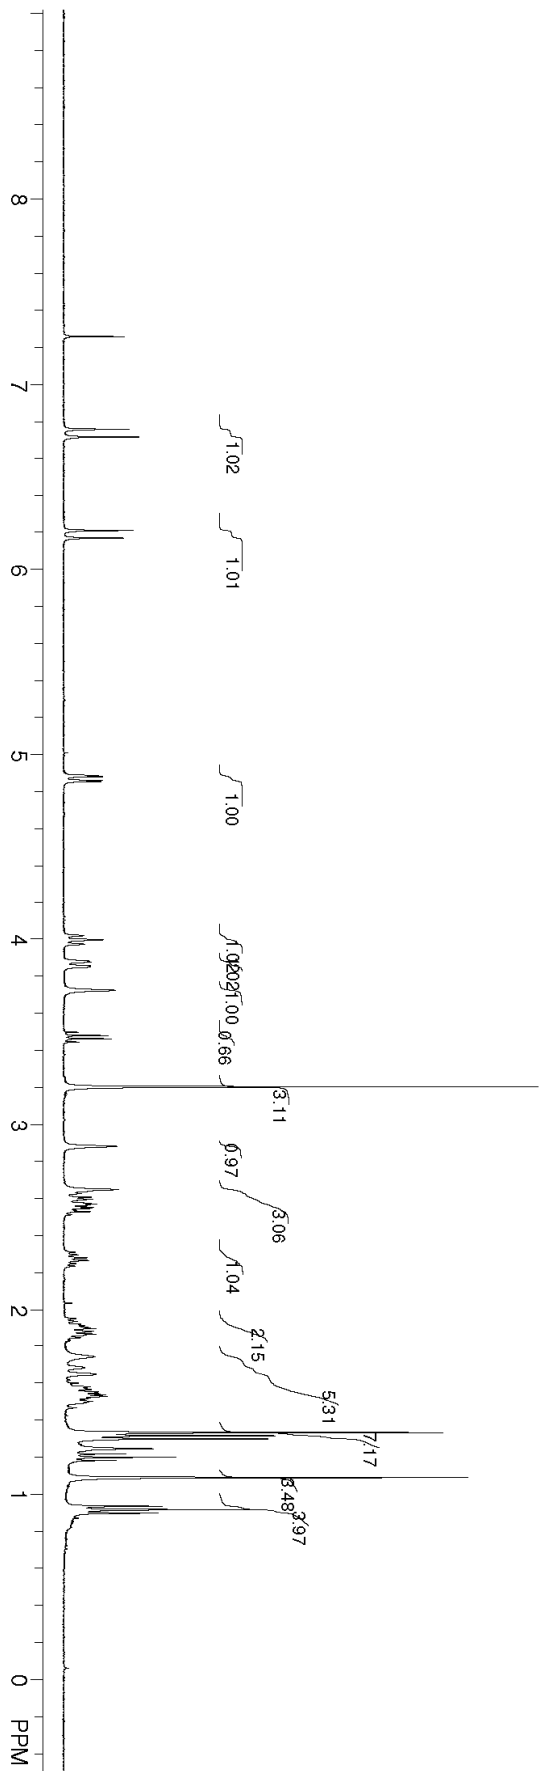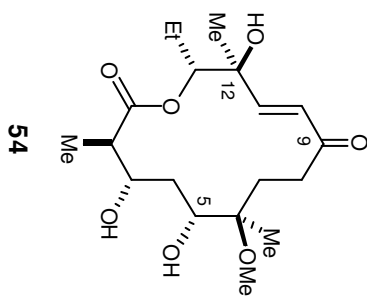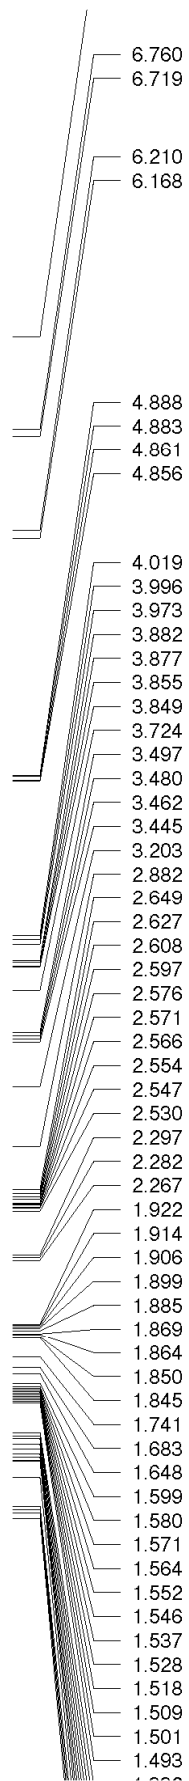

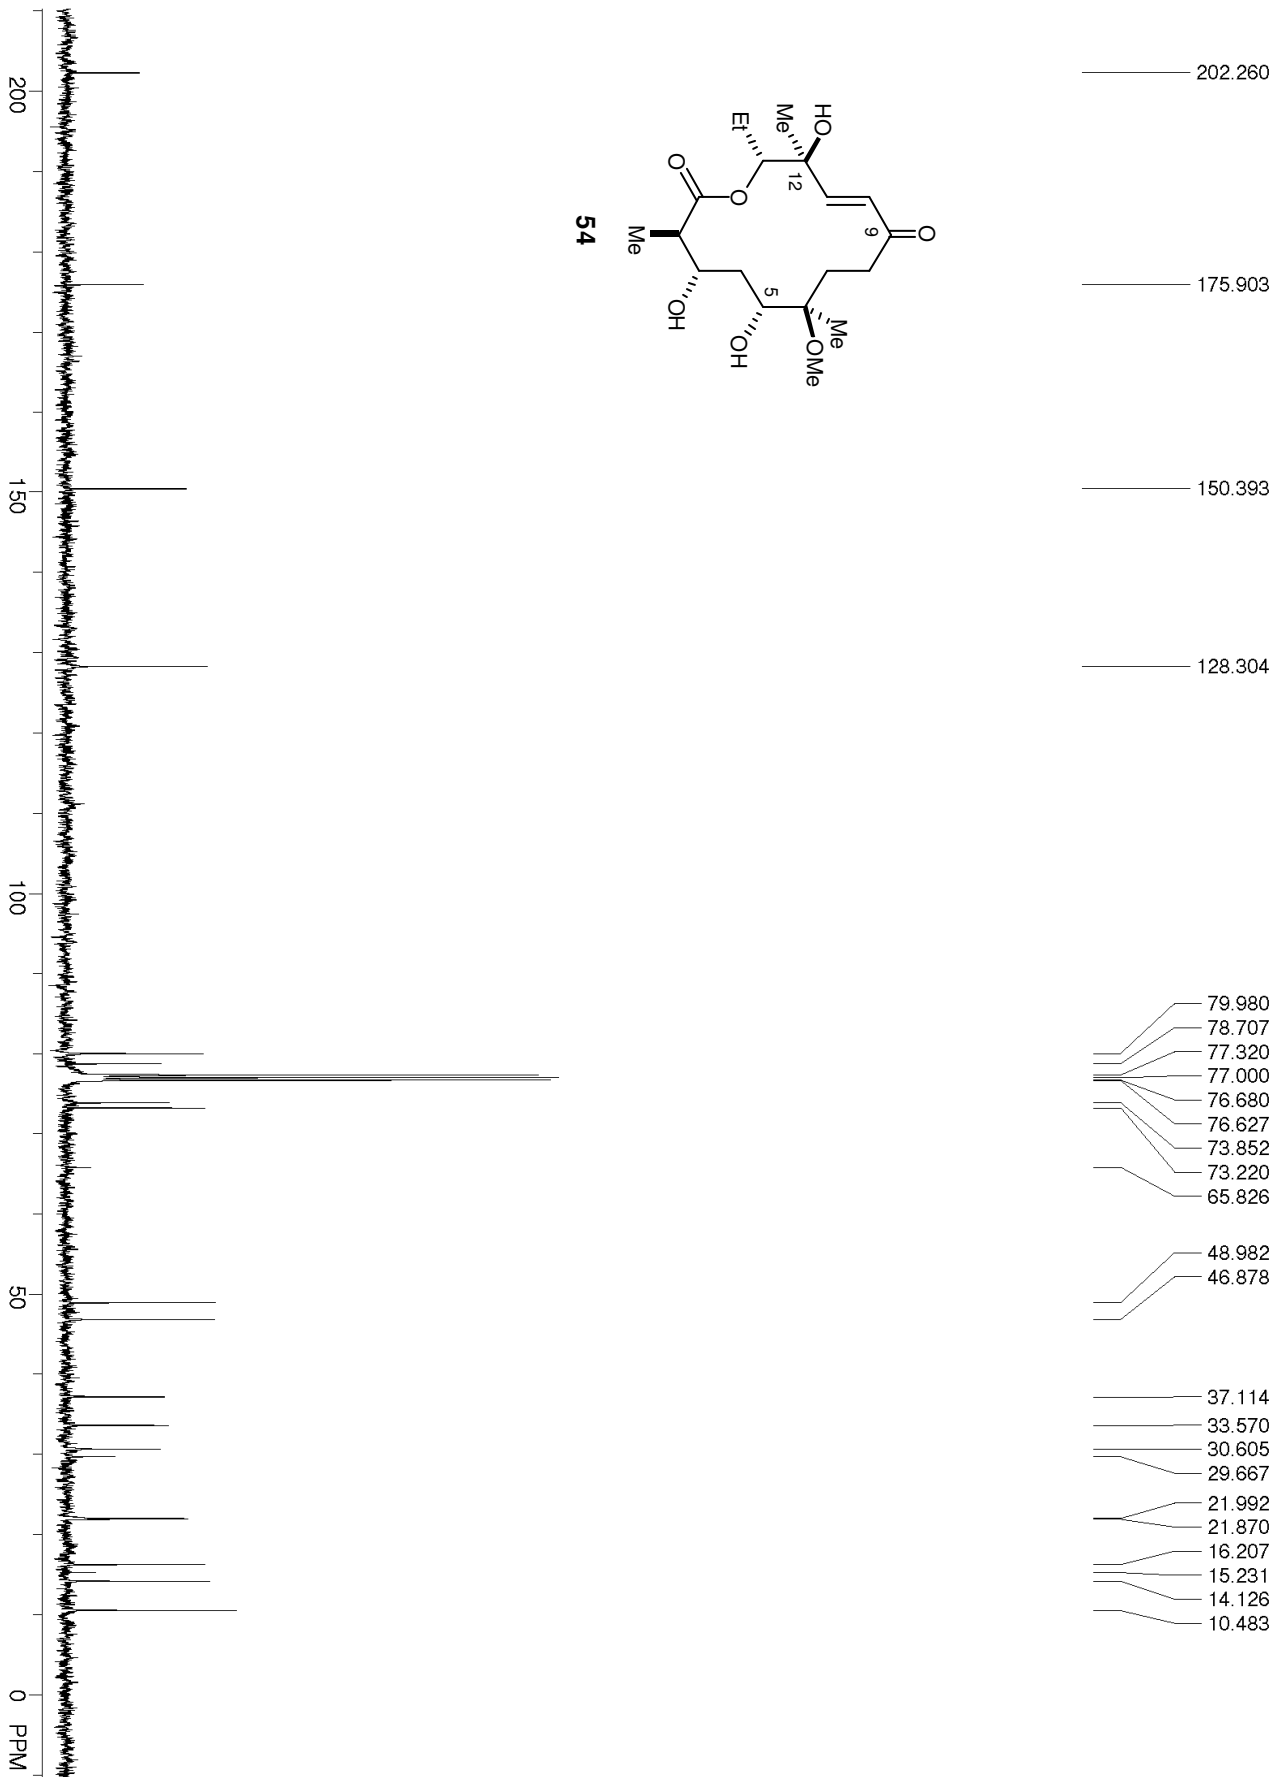



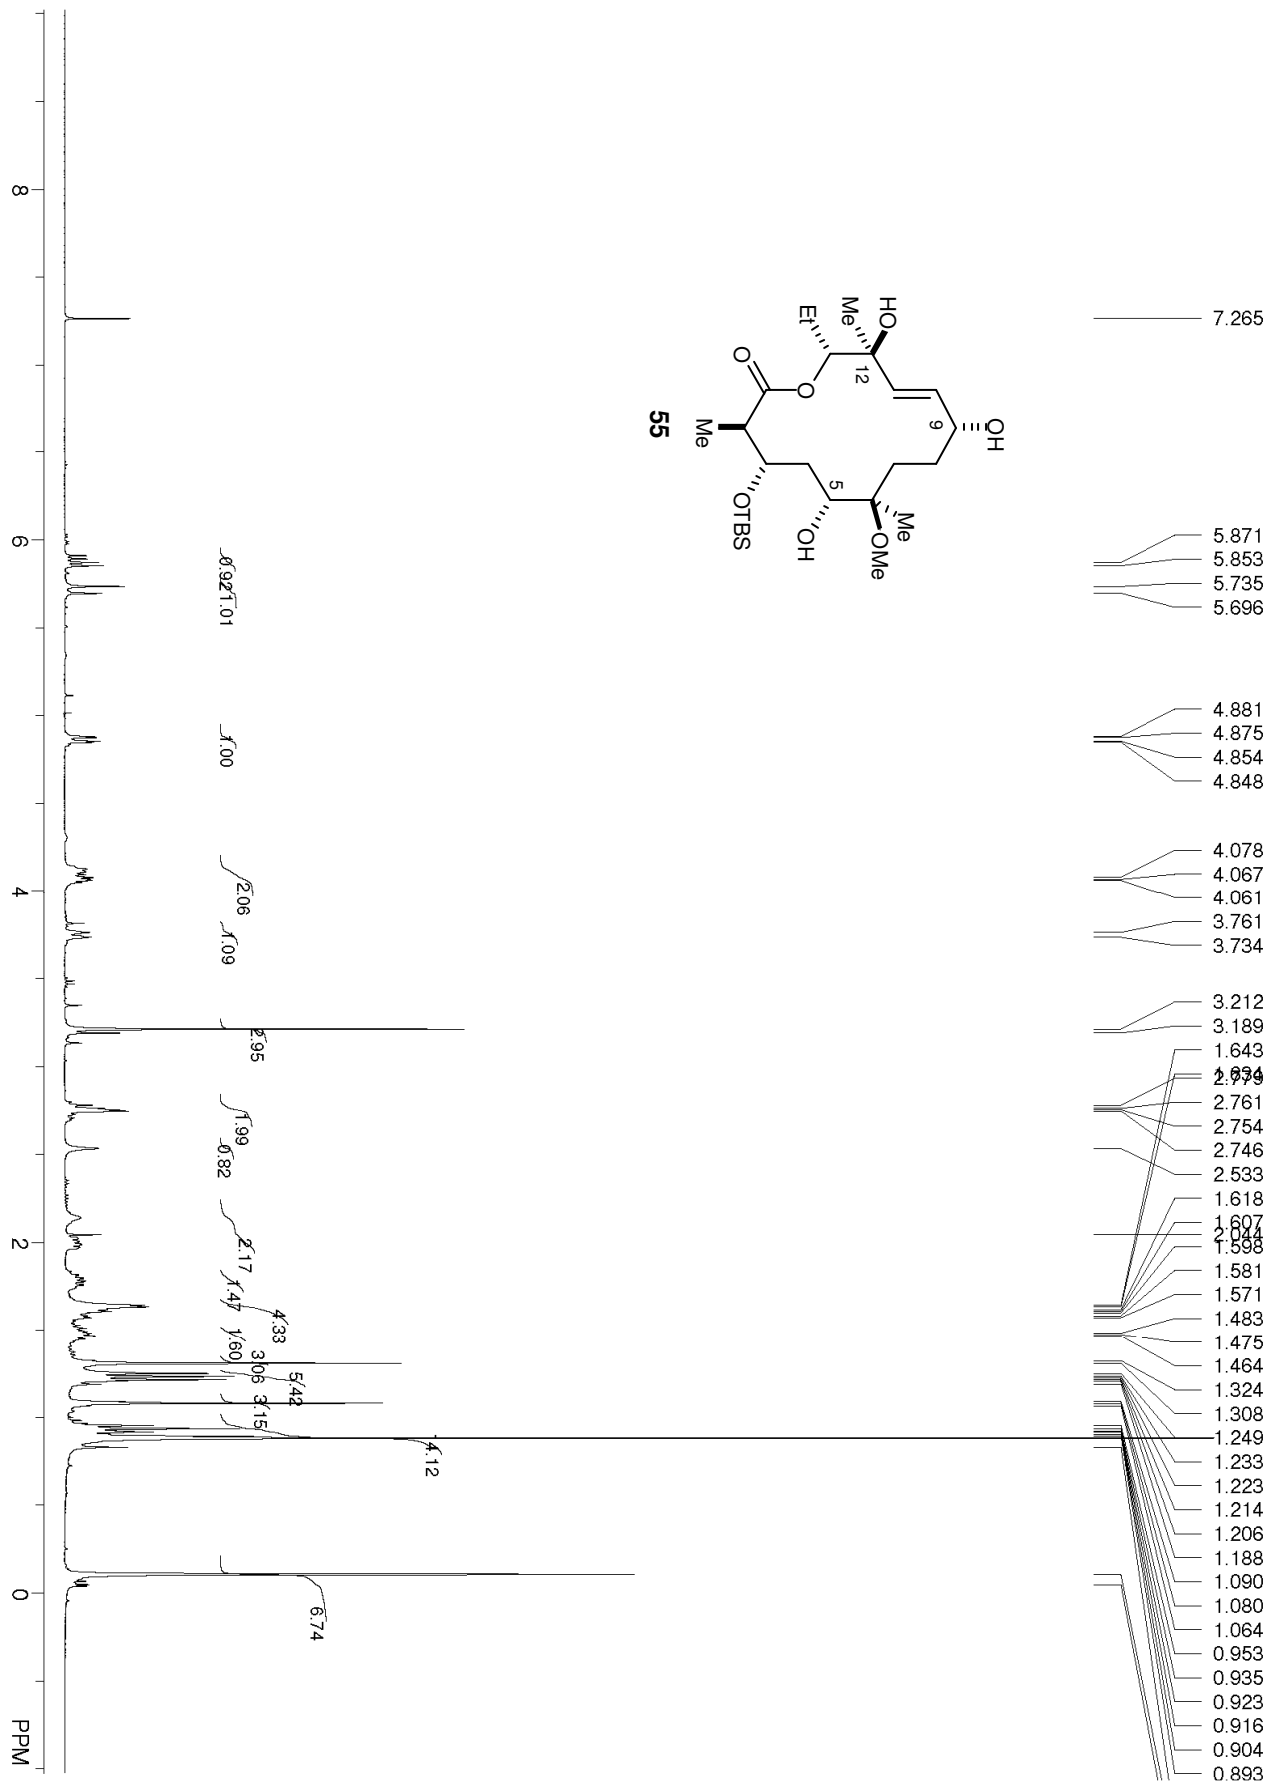

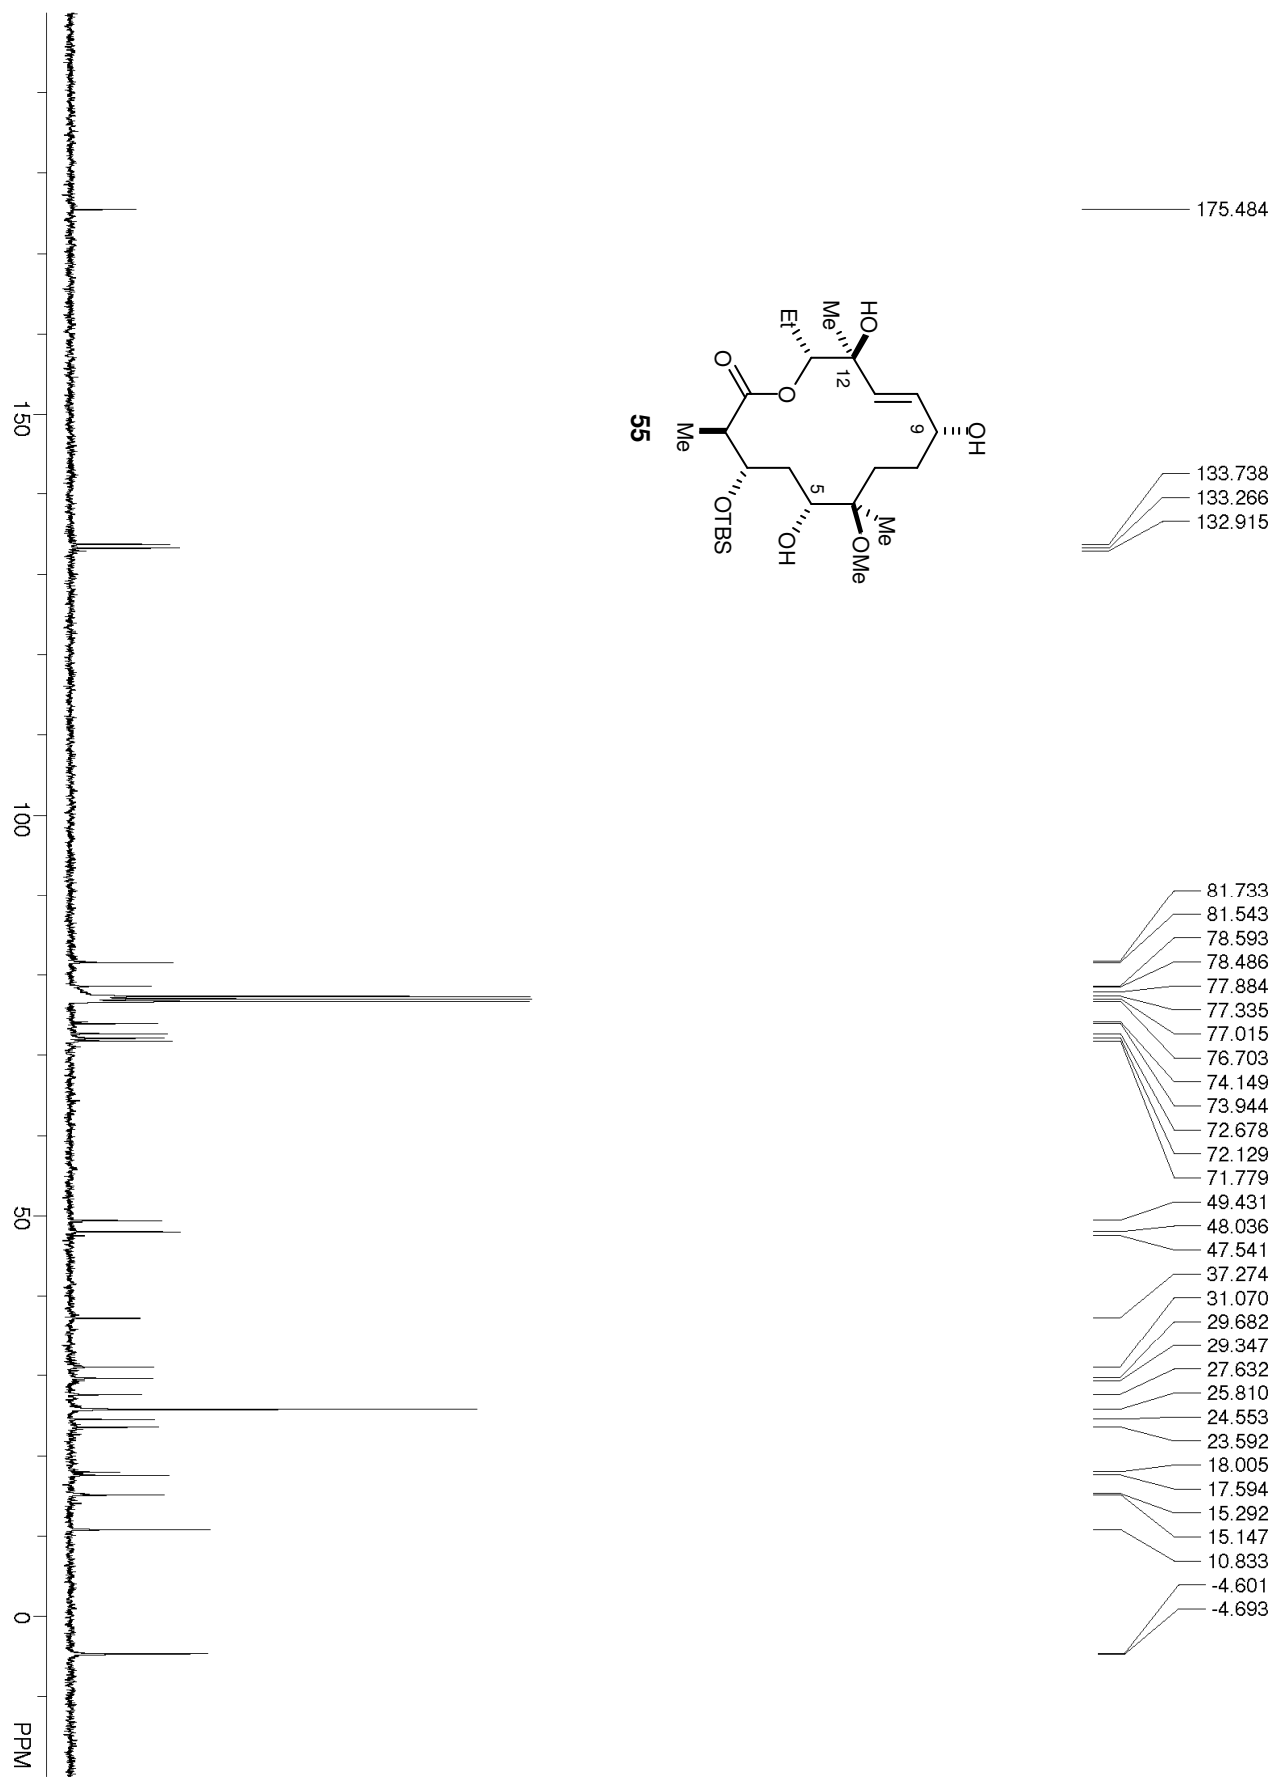

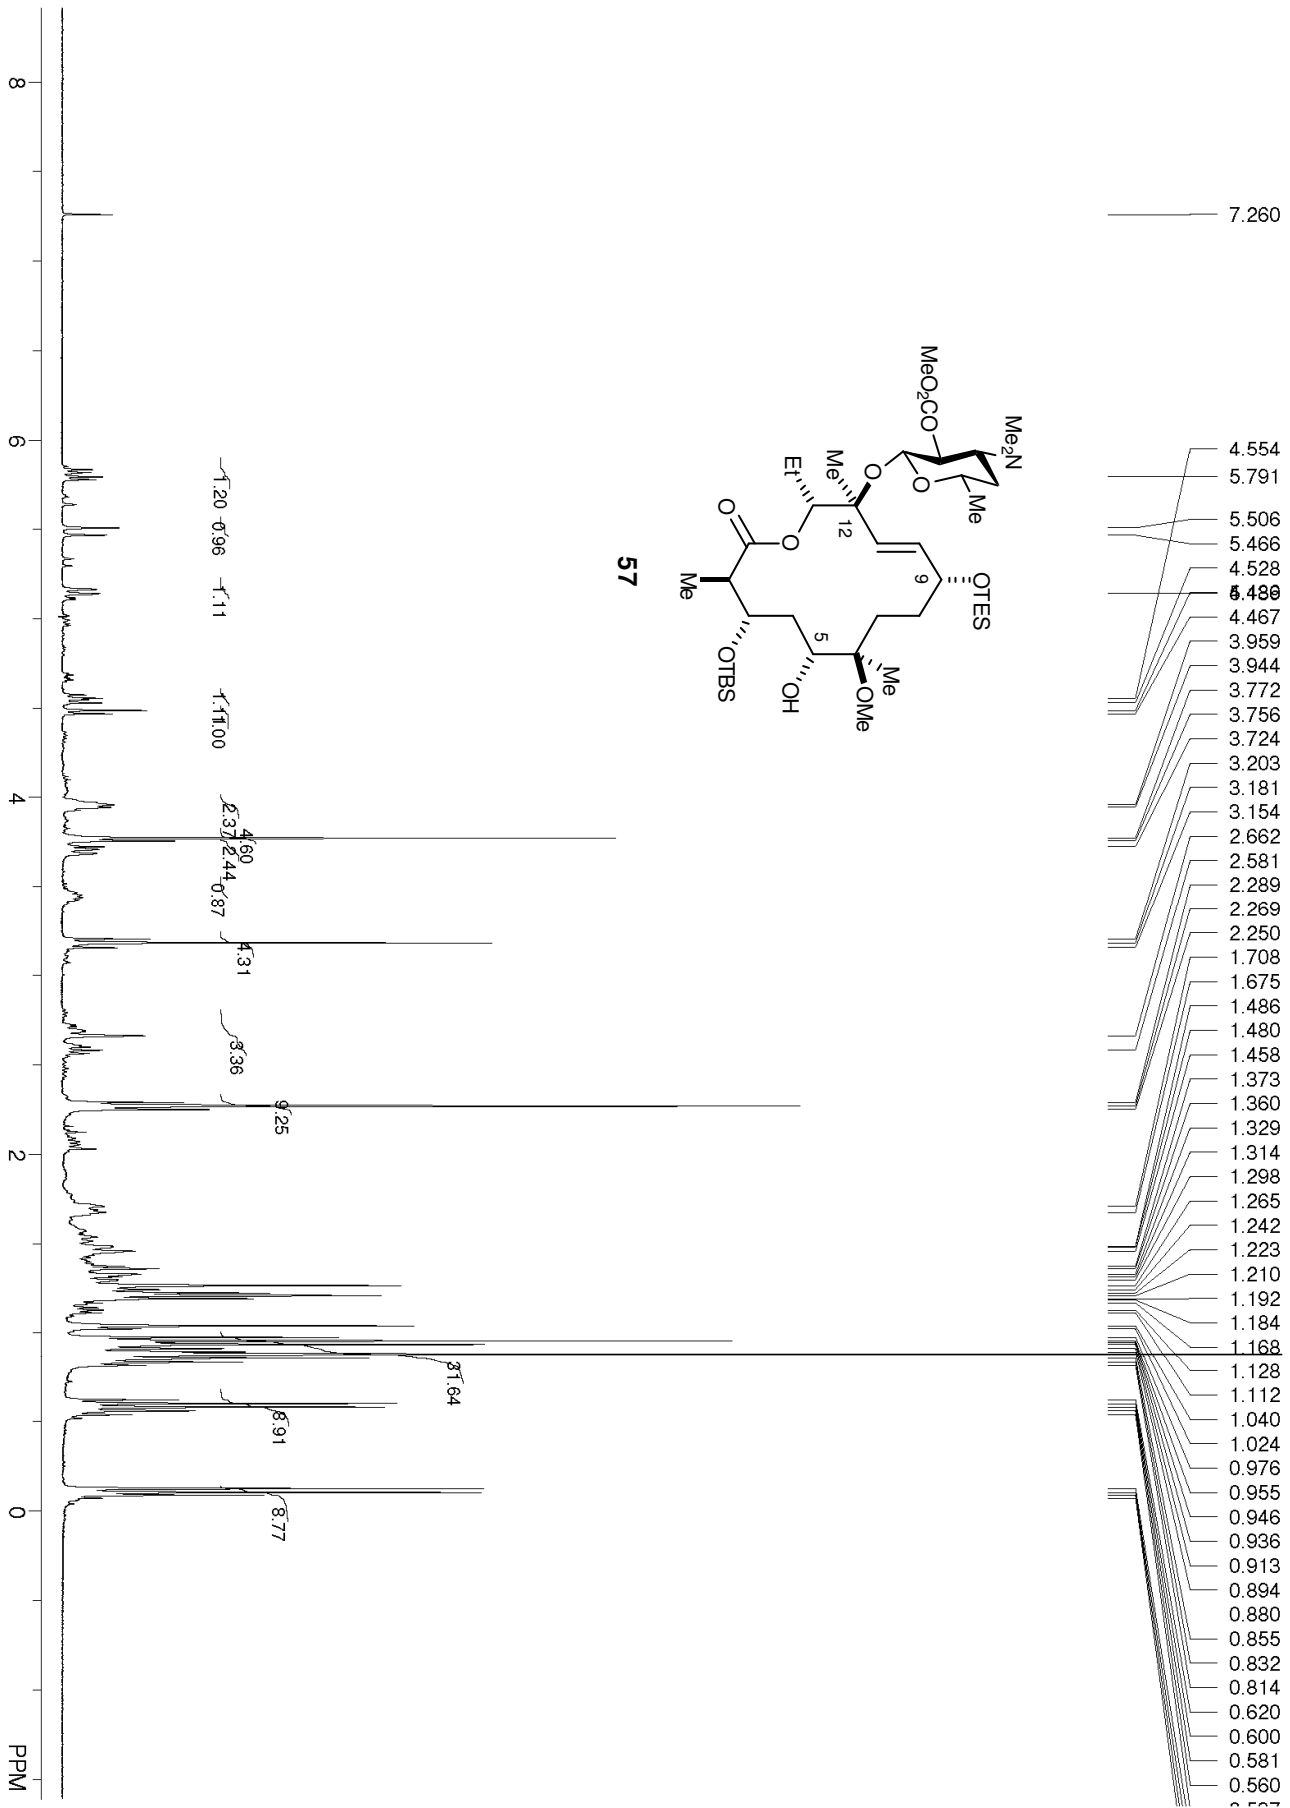

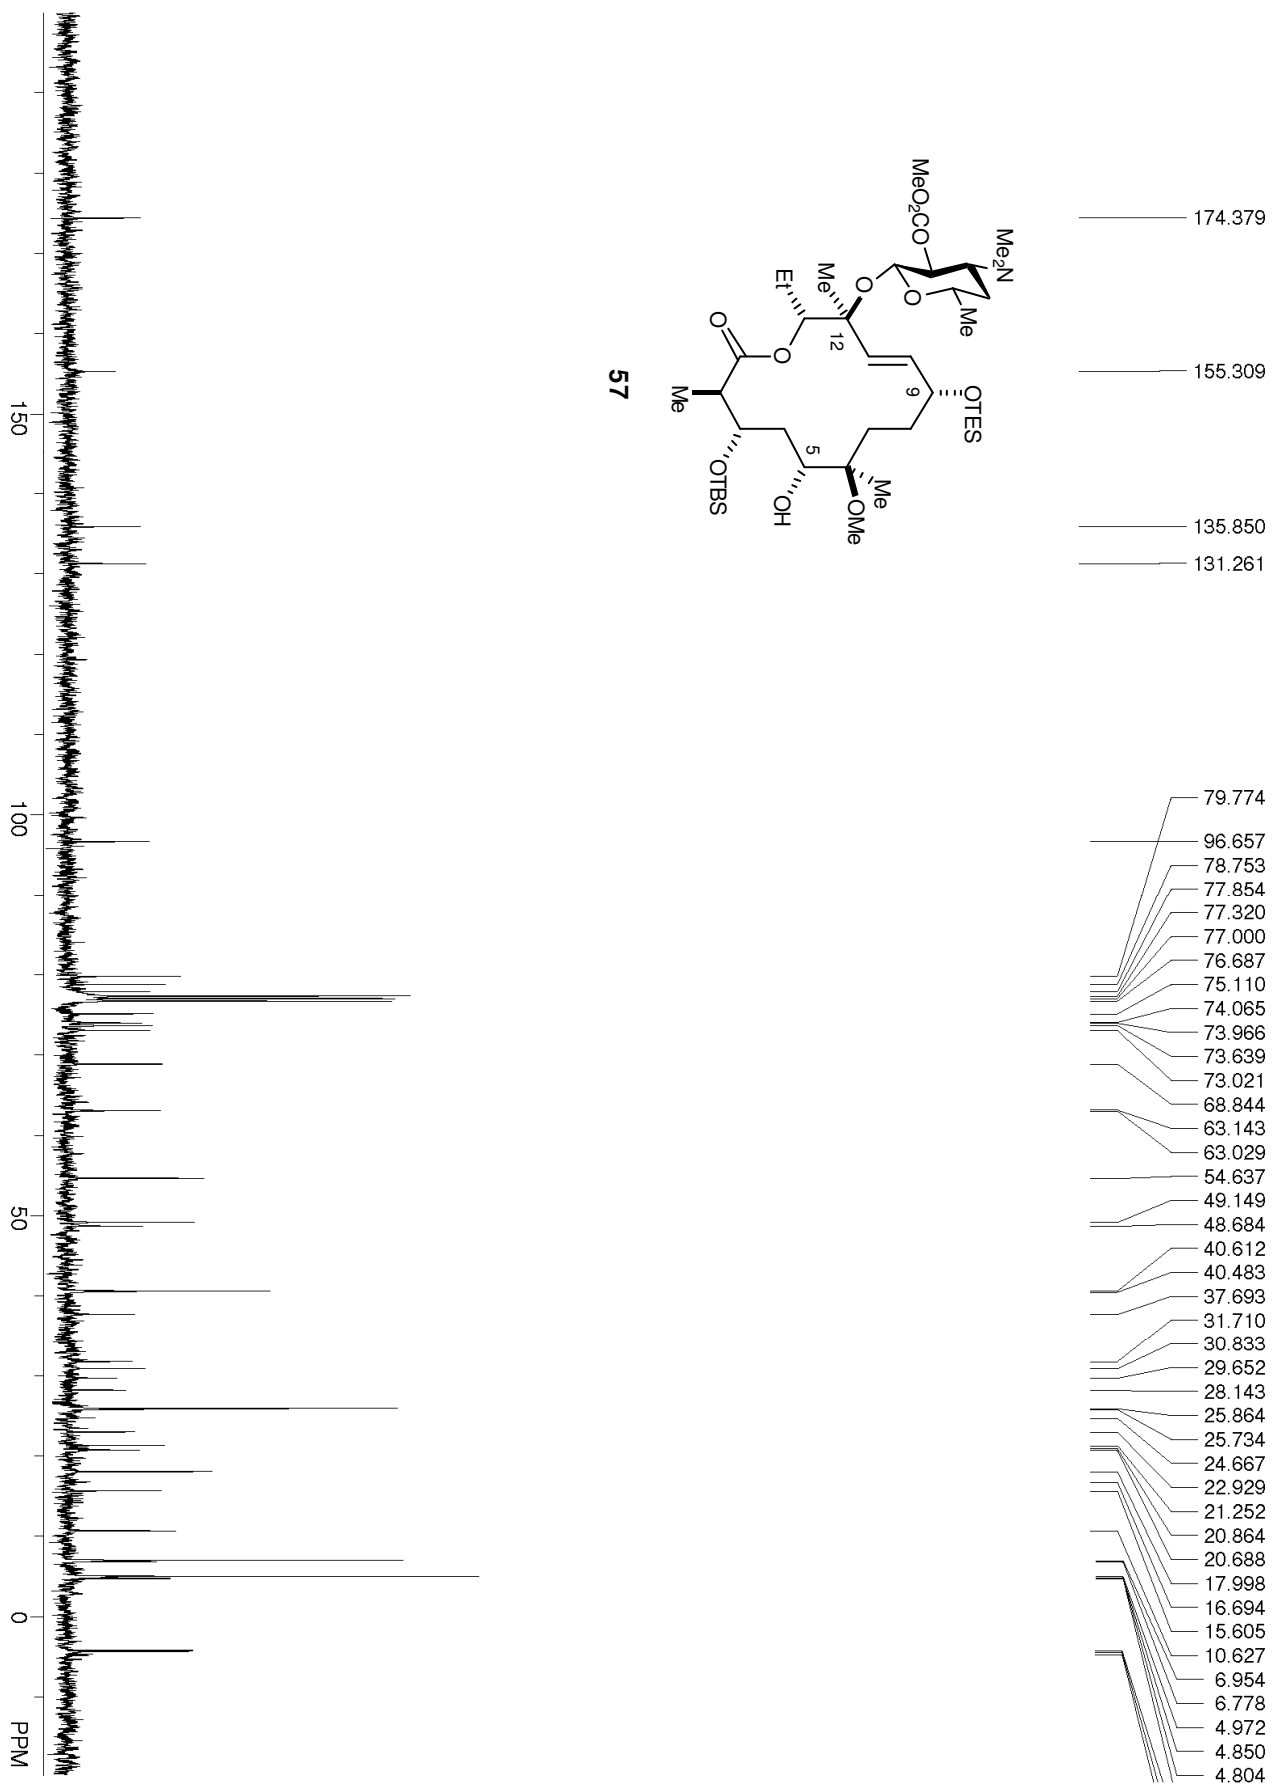



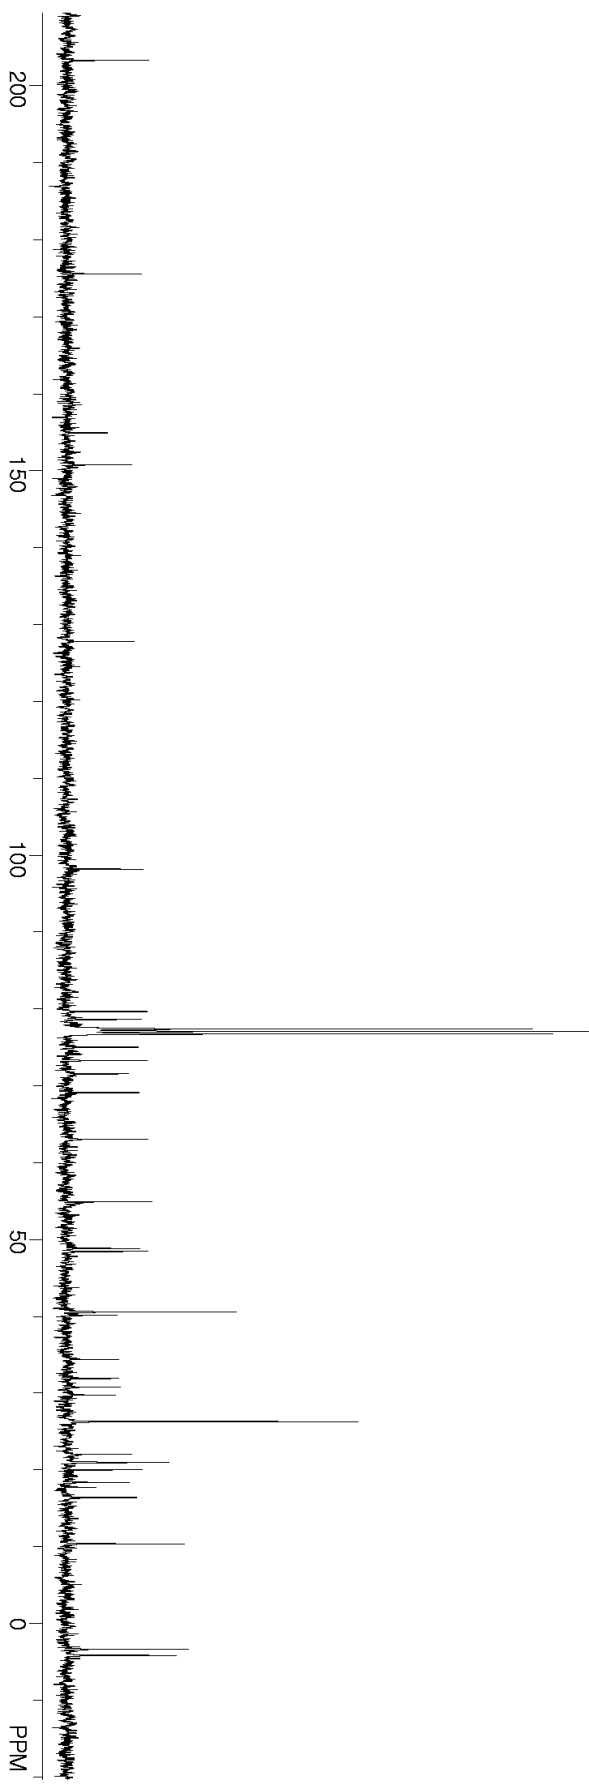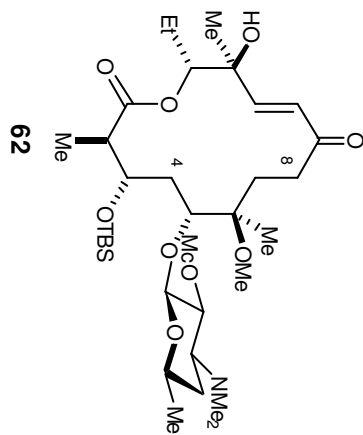

- 203.259
- 175.614
- 155.011
- 150.743
- 127.801
- 98.220
- 79.591
- 78.547
- 77.312
- 77.000
- 76.680
- 74.950
- 73.197
- 71.482
- 69.050
- 62.991
- 54.881
- 48.829
- 48.440
- 40.582
- 40.140
- 34.271
- 31.801
- 30.681
- 29.667
- 26.199
- 21.946
- 20.902
- 20.864
- 19.919
- 18.295
- 17.670
- 16.329
- 10.307
- 3.420
- 4.205

Structural assignments for 4,8,10-tridesmethyl 3-OTBS intermediate

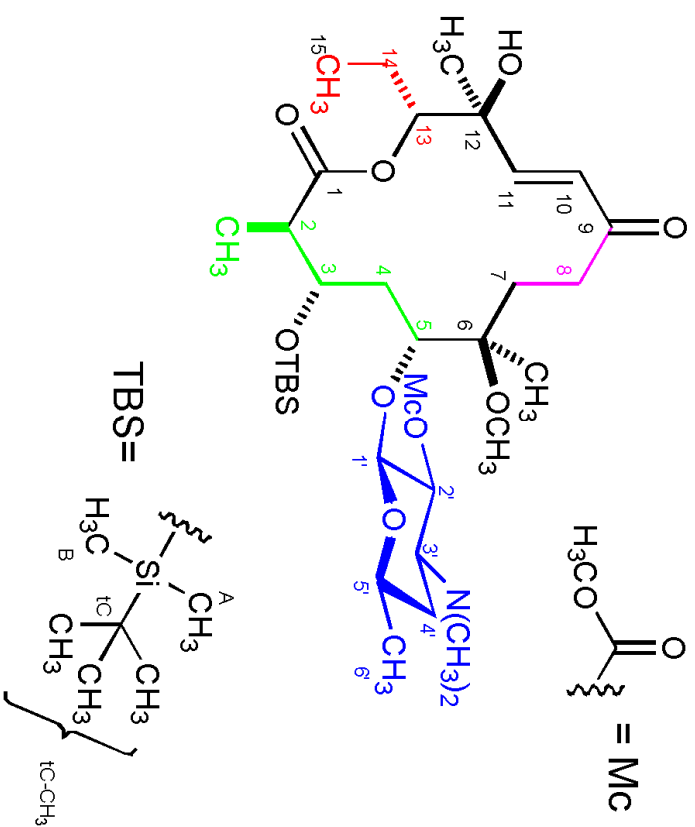

# C10-C11 Spin System

debrosse 12002 1 C:\Bruker\TOPSPIN debrosse

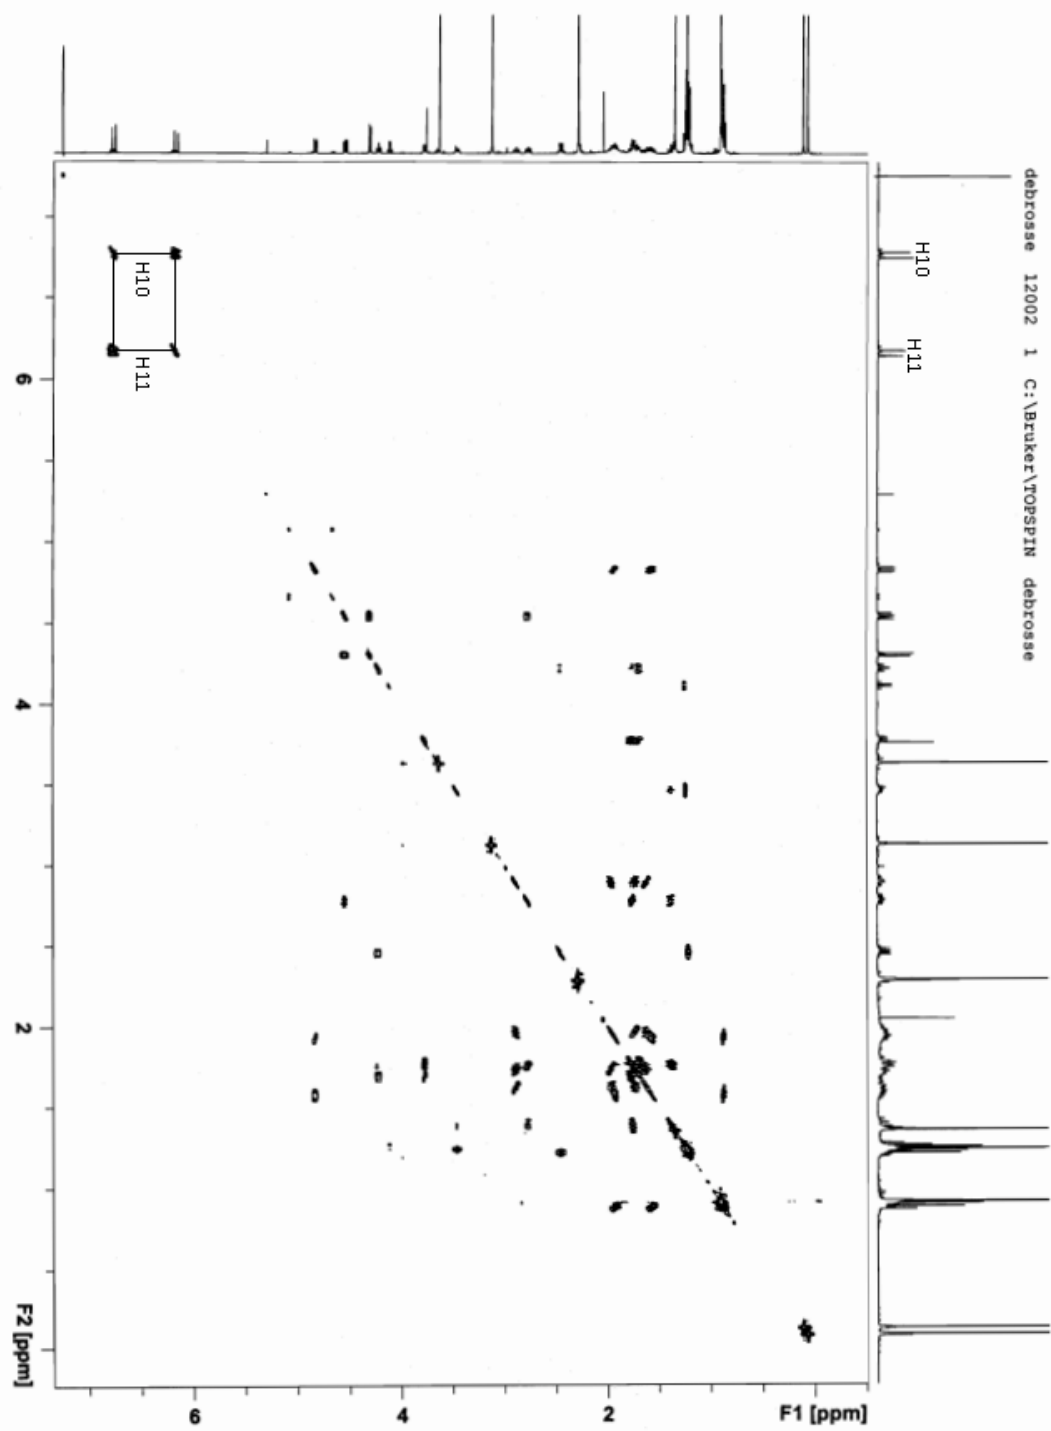



# CH<sub>3</sub>-2a – C5 Spin System

debrose 12002 1 C:\Bruker\TOPSPIN debrose

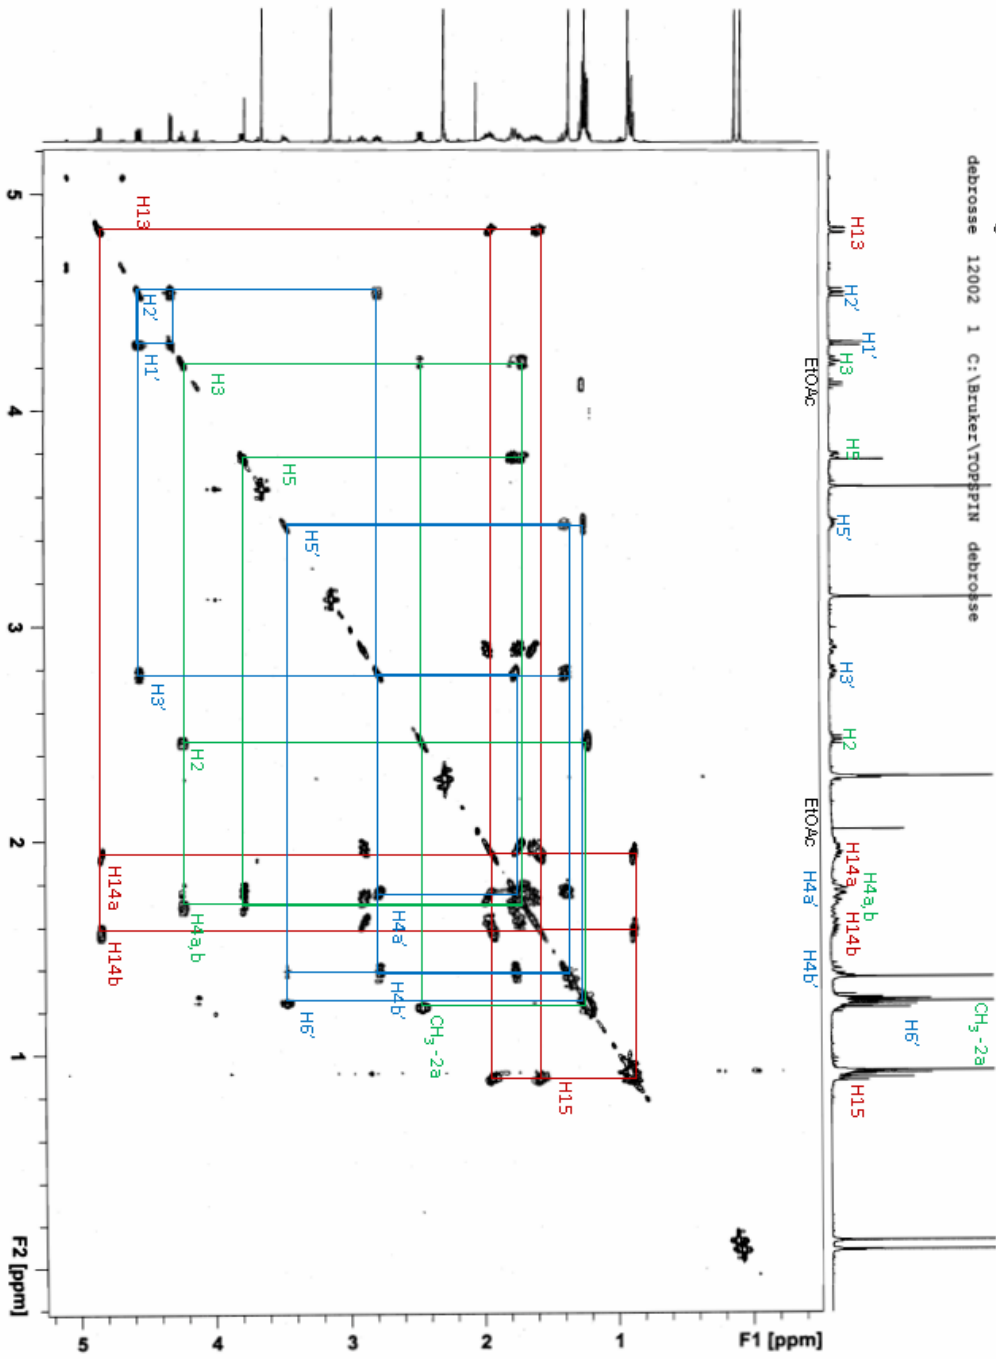

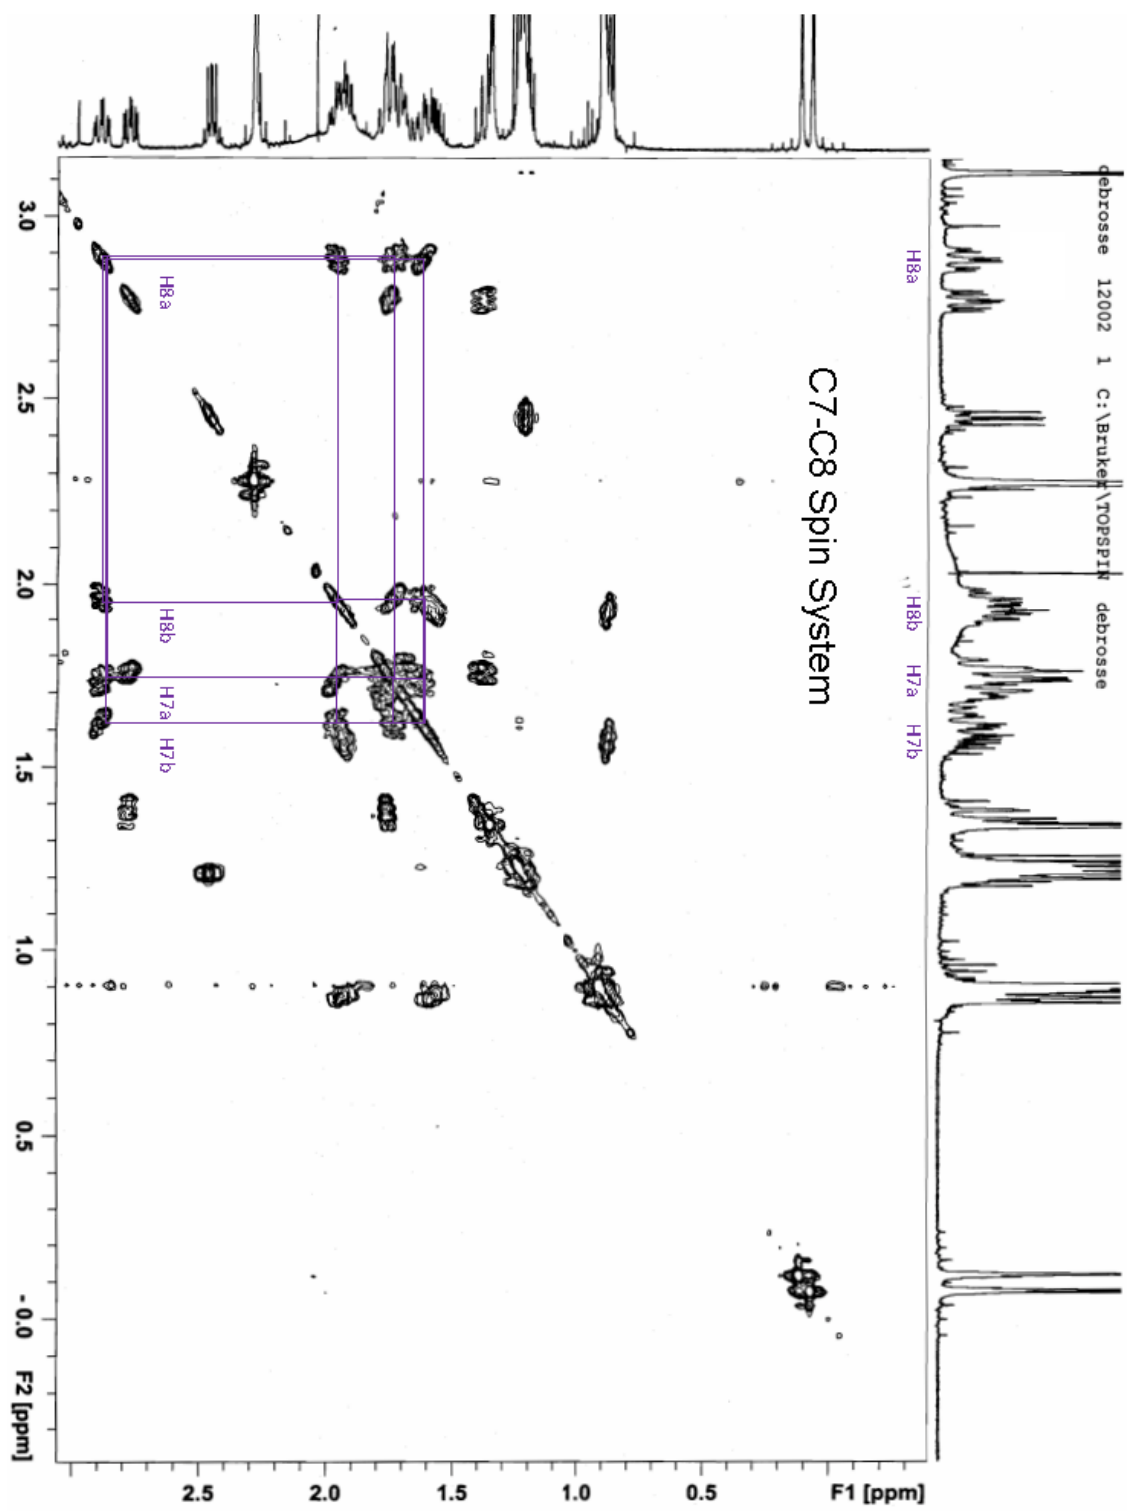

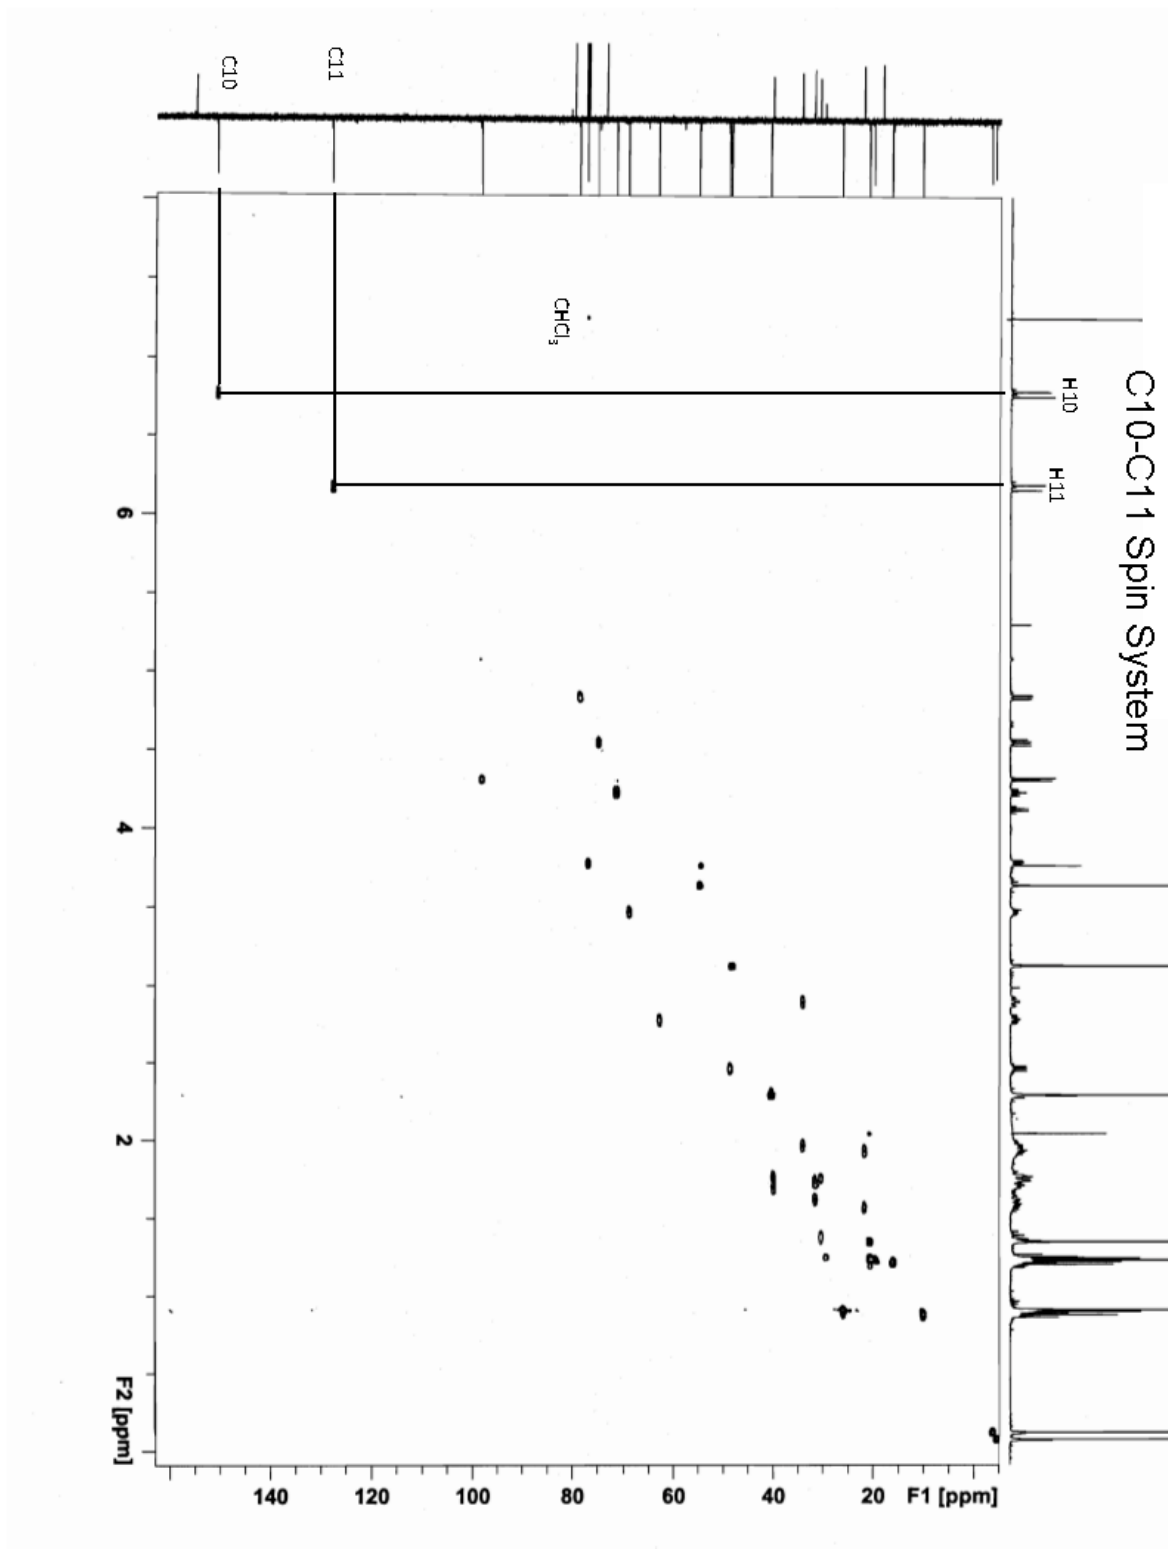

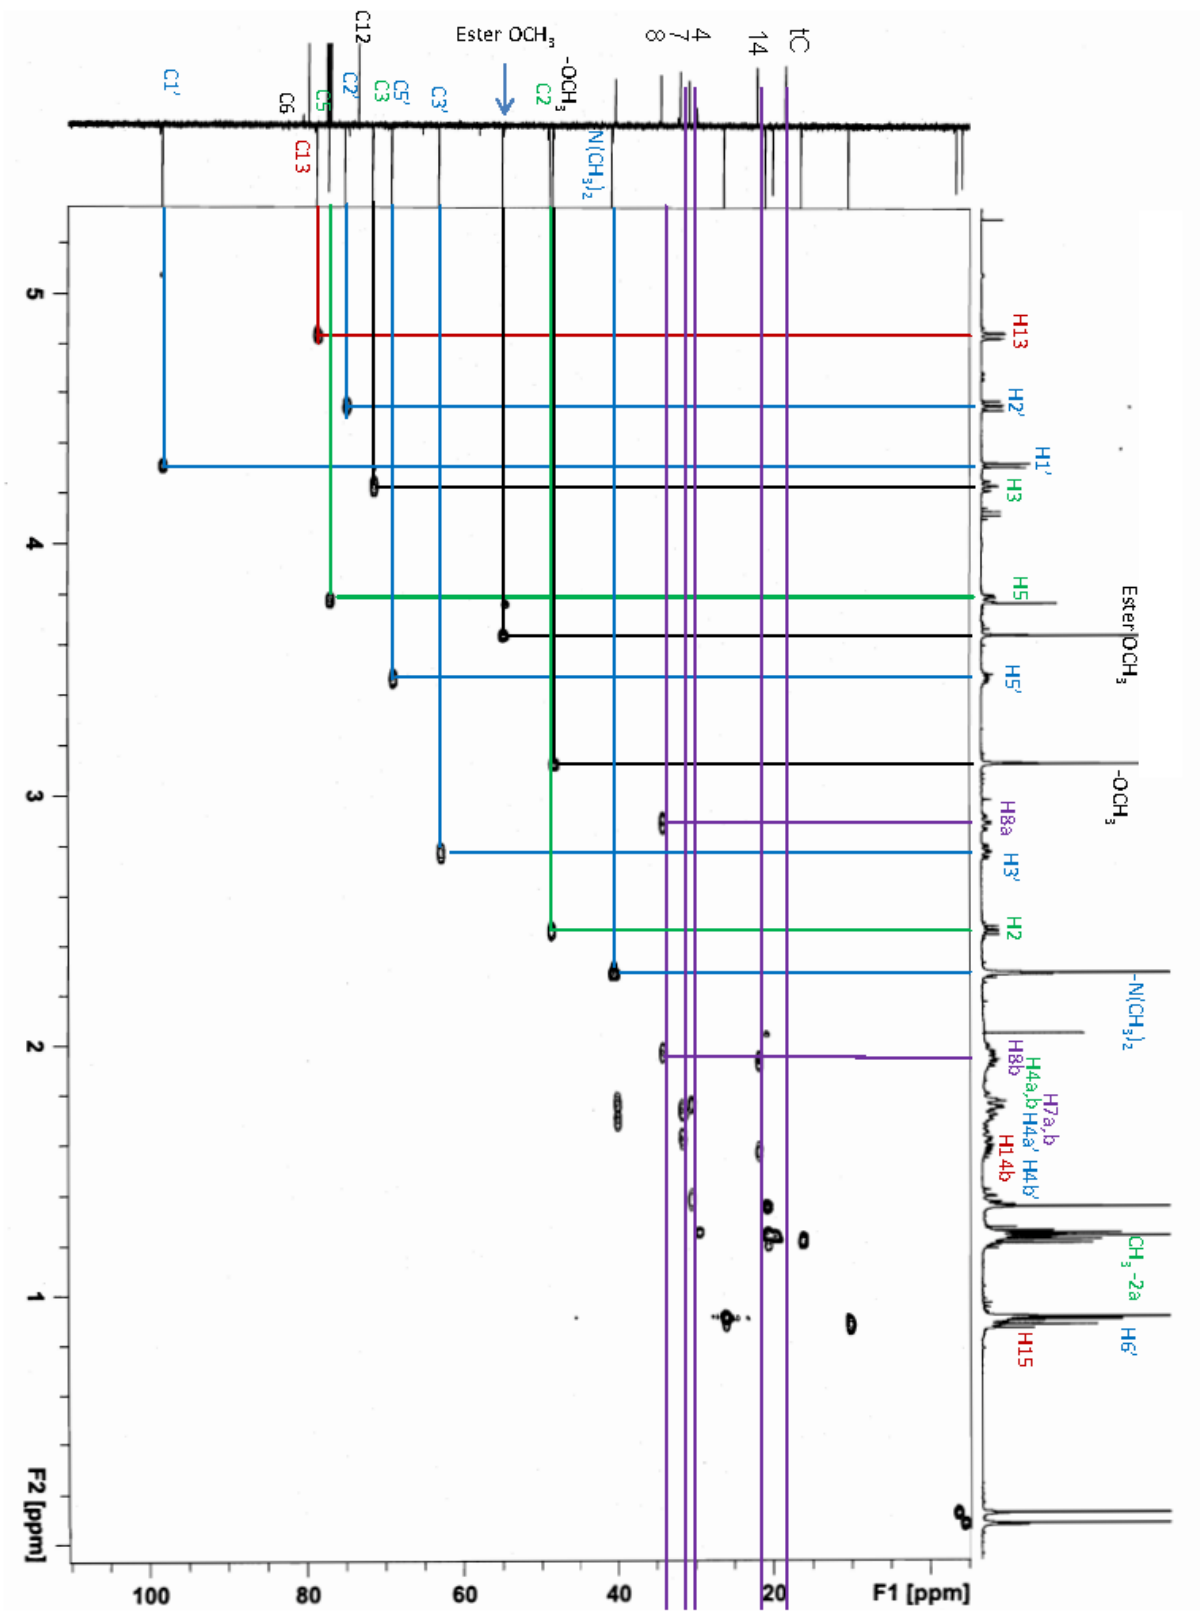

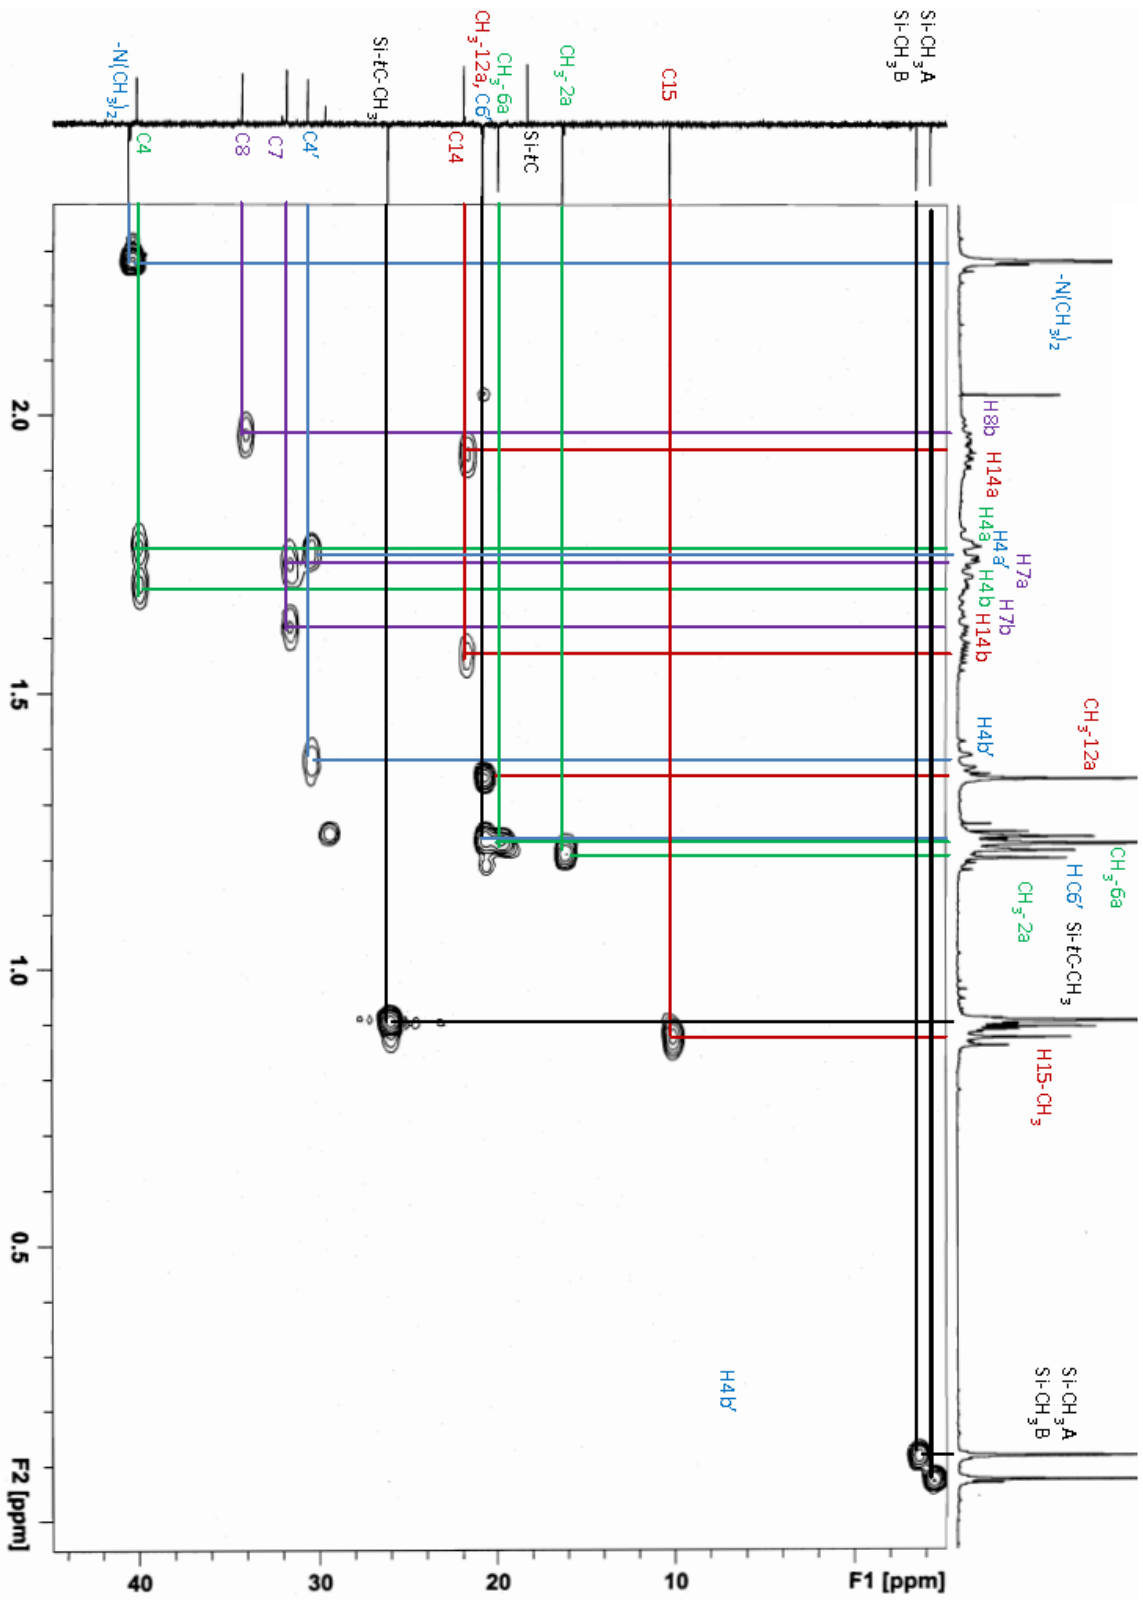

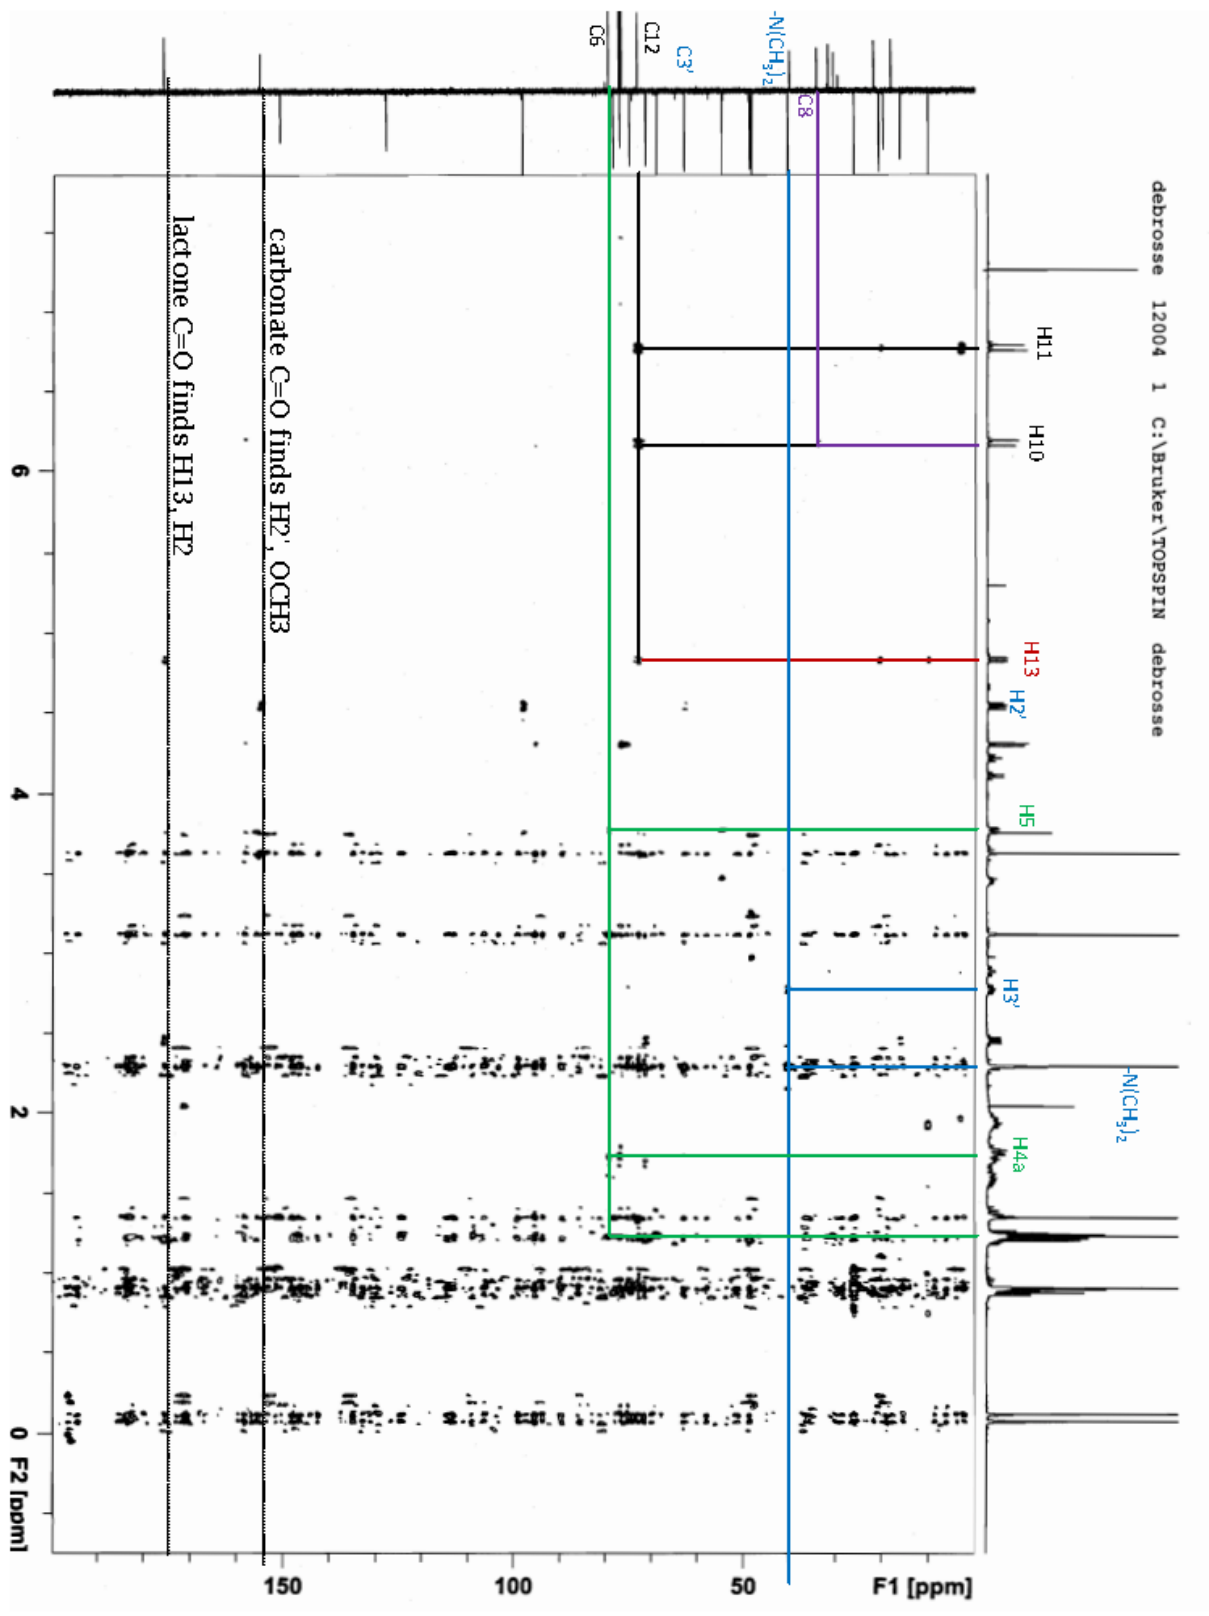

### *X-ray Structure Determination of Compound 35*

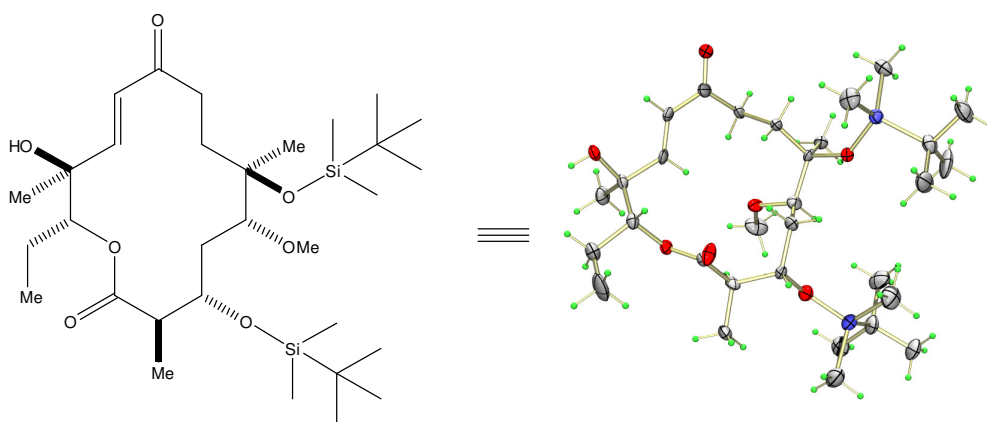

Compound 99085, C<sub>31</sub>H<sub>60</sub>Si<sub>2</sub>O<sub>7</sub>, crystallizes in the triclinic space group P1 with  $a=14.540(2)\text{\AA}$ ,  $b=15.889(2)\text{\AA}$ ,  $c=18.453(2)\text{\AA}$ ,  $\alpha=86.760(5)^\circ$ ,  $\beta=79.926(5)^\circ$ ,  $\gamma=64.920(5)^\circ$ ,  $V=3800.8(6)\text{\AA}^3$ ,  $Z=4$  and  $d_{\text{calc}}=1.050\text{ g/cm}^3$ . X-ray intensity data were collected on a Rigaku Mercury CCD area detector employing graphite-monochromated Mo-K $\alpha$  radiation ( $\lambda=0.71073\text{ \AA}$ ) at a temperature of 143K. Preliminary indexing was performed from a series of twelve  $0.5^\circ$  rotation images with exposures of 30 seconds. A total of 578 rotation images were collected with a crystal to detector distance of 35 mm, a  $2\theta$  swing angle of  $-12^\circ$ , rotation widths of  $0.5^\circ$  and exposures of 20 seconds: scan no. 1 was a  $\phi$ -scan from  $315^\circ$  to  $525^\circ$  at  $\omega = 10^\circ$  and  $\chi = 20^\circ$ ; scan no. 2 an  $\omega$ -scan from  $-20^\circ$  to  $5^\circ$  at  $\chi = -90^\circ$  and  $\phi = 315^\circ$ ; scan no. 3 was an  $\omega$ -scan from  $-20^\circ$  to  $12^\circ$  at  $\chi = -90^\circ$  and  $\phi = 135^\circ$ ; scan no. 4 was an  $\omega$ -scan from  $-20^\circ$  to  $2^\circ$  at  $\chi = -90^\circ$  and  $\phi = 225^\circ$ . Rotation images were processed using CrystalClear<sup>7</sup>, producing a listing of unaveraged  $F^2$  and  $\sigma(F^2)$  values which were then passed to the CrystalStructure<sup>8</sup> program package for further processing and structure solution on a Dell Pentium III computer. A total of 26883 reflections were measured over the ranges  $5.02 \leq 2\theta \leq 45.1^\circ$ ,  $-15 \leq h \leq 15$ ,  $-17 \leq k \leq 17$ ,  $-19 \leq l \leq 19$  yielding 26883 unique reflections ( $R_{\text{int}} = 0.0000$ ). The intensity data were corrected for Lorentz and polarization effects and for absorption using REQAB<sup>9</sup> (minimum and maximum transmission 0.393, 1.000).

The structure was solved by direct methods (SIR2004<sup>10</sup>). The asymmetric unit includes four molecules of the title compound. Initial refinement yielded an R-factor over 25%; analysis by the TwinSolve module of CrystalClear indicated that the crystal was twinned by rotation of 180° about the b\* reciprocal axis. A data file with F<sup>2</sup> values for two twin components was prepared for use in the least squares program. Refinement was by full-matrix least squares based on F<sup>2</sup> using SHELXL-97<sup>11</sup>. All reflections were used during refinement. The weighting scheme used was  $w=1/[\sigma^2(F_o^2) + 0.1165P^2 + 4.9260P]$  where  $P = (F_o^2 + 2F_c^2)/3$ . Non-hydrogen atoms were refined using a “riding” model. Refinement converged to R<sub>1</sub>=0.0770 and wR<sub>2</sub>=0.1958 for 23395 reflections for which  $F > 4\sigma(F)$  and R<sub>1</sub>=0.0944, wR<sub>2</sub>=0.2169 and GOF = 1.117 for all 26883 unique, non-zero reflections and 1443 variables<sup>12</sup>. The maximum  $\Delta/\sigma$  in the final cycle of least squares was 0.025 and the two most prominent peaks in the final difference Fourier were +0.895 and -0.361 e/Å<sup>3</sup>. The twinning parameter refined to a value of 0.497(1).

Table 1. lists cell information, data collection parameters, and refinement data. Final positional and equivalent isotropic thermal parameters are given in Table 2. Anisotropic thermal parameters are in Table 3. Tables 4. and 5. list bond distances and bond angles. Figure 1. is a numbered ChemDraw of the molecule. Figure 2. is ORTEP<sup>13</sup> representations of the molecule with 30% probability thermal ellipsoids displayed.

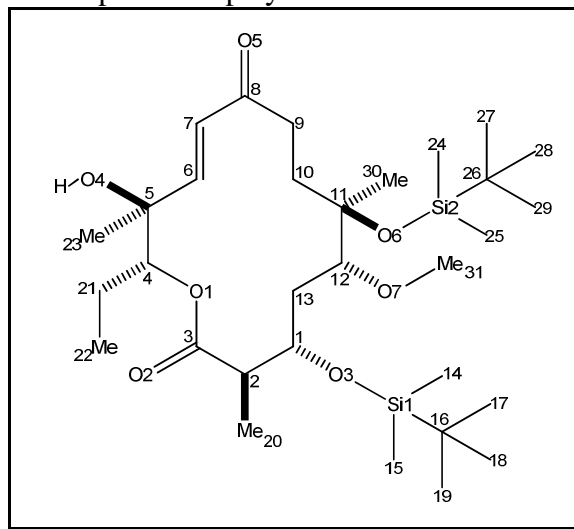

Figure 1. Numbered ChemDraw of the molecule.



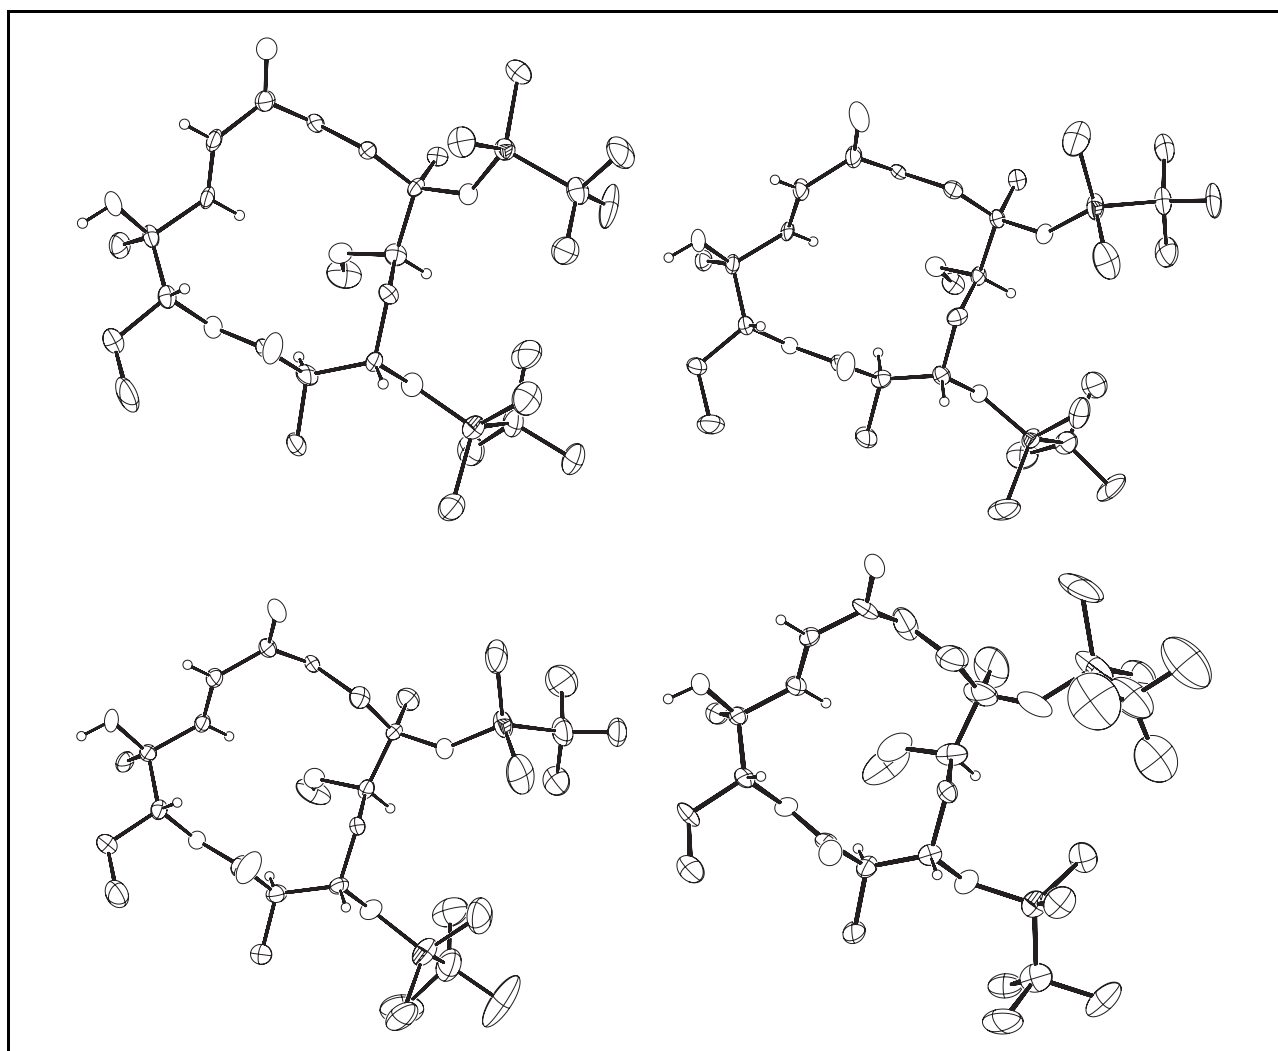

Figure 2. ORTEP drawings of the four molecules in the asymmetric unit with 30% probability thermal ellipsoids.

**Table 1. Summary of Structure Determination of Compound 99085**

|                                          |                                                                |
|------------------------------------------|----------------------------------------------------------------|
| Formula:                                 | C <sub>31</sub> H <sub>60</sub> Si <sub>2</sub> O <sub>7</sub> |
| Formula weight:                          | 600.97                                                         |
| Crystal class:                           | triclinic                                                      |
| Space group:                             | P1 (#1)                                                        |
| Z                                        | 4                                                              |
| Cell constants:                          |                                                                |
| a                                        | 14.540(2)Å                                                     |
| b                                        | 15.889(2)Å                                                     |
| c                                        | 18.453(2)Å                                                     |
| α                                        | 86.760(5)°                                                     |
| β                                        | 79.926(5)°                                                     |
| γ                                        | 64.920(5)°                                                     |
| V                                        | 3800.8(6)Å <sup>3</sup>                                        |
| μ                                        | 1.31 cm <sup>-1</sup>                                          |
| crystal size, mm                         | 0.40 x 0.22 x 0.06                                             |
| D <sub>calc</sub>                        | 1.050 g/cm <sup>3</sup>                                        |
| F(000)                                   | 1320                                                           |
| Radiation:                               | Mo-K <sub>α</sub> (λ=0.71073Å)                                 |
| 2θ range                                 | 5.02 – 45.1 °                                                  |
| hkl collected:                           | -15 ≤ h ≤ 15; -17 ≤ k ≤ 17; -19 ≤ l ≤ 19                       |
| No. reflections measured:                | 26883                                                          |
| No. unique reflections:                  | 26883 (R <sub>int</sub> =0.0000)                               |
| No. observed reflections                 | 23395 (F>4σ)                                                   |
| No. reflections used in refinement       | 26883                                                          |
| No. parameters                           | 1443                                                           |
| R indices (F>4σ)                         | R <sub>1</sub> =0.0770<br>wR <sub>2</sub> =0.1958              |
| R indices (all data)                     | R <sub>1</sub> =0.0944<br>wR <sub>2</sub> =0.2169              |
| GOF:                                     | 1.117                                                          |
| Final Difference Peaks, e/Å <sup>3</sup> | +0.895, -0.361                                                 |

**Table 2. Refined Positional Parameters for Compound 99085**

| Atom<br>Å <sup>2</sup> | x         | y           | z           | U <sub>eq</sub> |
|------------------------|-----------|-------------|-------------|-----------------|
| Molecule No. 1         |           |             |             |                 |
| Si1                    | 0.2194(2) | 0.7766(2)   | 1.22399(11) | 0.0531(6)       |
| Si2                    | 0.5091(2) | 0.50718(14) | 0.94335(10) | 0.0377(5)       |
| O1                     | 0.3511(3) | 1.0264(3)   | 0.9968(2)   | 0.0360(11)      |
| O2                     | 0.4673(4) | 0.9204(4)   | 1.0599(3)   | 0.0522(14)      |
| O3                     | 0.2304(4) | 0.8329(4)   | 1.1465(3)   | 0.0484(13)      |
| O4                     | 0.4994(4) | 1.0493(3)   | 0.8201(3)   | 0.0459(12)      |
| H4                     | 0.5027    | 1.0980      | 0.8283      | 0.069           |
| O5                     | 0.5129(5) | 0.7696(4)   | 0.7147(3)   | 0.058(2)        |
| O6                     | 0.4105(4) | 0.6089(3)   | 0.9689(2)   | 0.0378(11)      |
| O7                     | 0.2499(4) | 0.8571(3)   | 0.9623(2)   | 0.0416(12)      |
| C1                     | 0.3217(6) | 0.8416(5)   | 1.1100(3)   | 0.036(2)        |
| H1                     | 0.3706    | 0.8245      | 1.1445      | 0.047           |
| C2                     | 0.2892(6) | 0.9468(5)   | 1.0909(4)   | 0.039(2)        |
| H2                     | 0.2342    | 0.9669      | 1.0612      | 0.052           |
| C3                     | 0.3816(6) | 0.9601(5)   | 1.0479(3)   | 0.034(2)        |
| C4                     | 0.4301(5) | 1.0464(5)   | 0.9471(4)   | 0.035(2)        |
| H4a                    | 0.4979    | 0.9974      | 0.9521      | 0.046           |
| C5                     | 0.4134(5) | 1.0440(5)   | 0.8679(4)   | 0.034(2)        |
| C6                     | 0.4112(6) | 0.9520(5)   | 0.8496(3)   | 0.036(2)        |
| H6                     | 0.3665    | 0.9332      | 0.8812      | 0.047           |
| C7                     | 0.4687(6) | 0.8968(5)   | 0.7918(4)   | 0.043(2)        |
| H7                     | 0.5195    | 0.9113      | 0.7636      | 0.057           |
| C8                     | 0.4576(7) | 0.8148(5)   | 0.7693(4)   | 0.045(2)        |
| C9                     | 0.3788(6) | 0.7852(5)   | 0.8118(3)   | 0.038(2)        |
| H9a                    | 0.3551    | 0.7565      | 0.7786      | 0.051           |
| H9b                    | 0.3199    | 0.8391      | 0.8350      | 0.051           |
| C10                    | 0.4271(6) | 0.7141(5)   | 0.8722(3)   | 0.034(2)        |
| H10a                   | 0.4760    | 0.6561      | 0.8476      | 0.045           |
| H10b                   | 0.4655    | 0.7378      | 0.8966      | 0.045           |
| C11                    | 0.3519(6) | 0.6932(5)   | 0.9312(3)   | 0.032(2)        |
| C12                    | 0.2995(6) | 0.7695(5)   | 0.9947(4)   | 0.038(2)        |
| H12                    | 0.2461    | 0.7557      | 1.0262      | 0.051           |
| C13                    | 0.3716(6) | 0.7739(5)   | 1.0432(4)   | 0.038(2)        |
| H13a                   | 0.4224    | 0.7911      | 1.0128      | 0.051           |
| H13b                   | 0.4082    | 0.7120      | 1.0611      | 0.051           |
| C14                    | 0.3245(8) | 0.6584(7)   | 1.2253(6)   | 0.078(3)        |
| H14a                   | 0.3283    | 0.6228      | 1.1836      | 0.118           |
| H14b                   | 0.3110    | 0.6283      | 1.2698      | 0.118           |
| H14c                   | 0.3888    | 0.6629      | 1.2230      | 0.118           |
| C15                    | 0.2107(9) | 0.8465(8)   | 1.3051(5)   | 0.076(3)        |
| H15a                   | 0.1567    | 0.9078      | 1.3037      | 0.113           |

|      |            |           |           |          |
|------|------------|-----------|-----------|----------|
| H15b | 0.2750     | 0.8507    | 1.3035    | 0.113    |
| H15c | 0.1960     | 0.8170    | 1.3496    | 0.113    |
| C16  | 0.0954(7)  | 0.7630(6) | 1.2259(4) | 0.059(2) |
| C17  | 0.1025(9)  | 0.7102(9) | 1.1544(5) | 0.080(3) |
| H17a | 0.1109     | 0.7459    | 1.1121    | 0.120    |
| H17b | 0.0404     | 0.7019    | 1.1564    | 0.120    |
| H17c | 0.1604     | 0.6506    | 1.1510    | 0.120    |
| C18  | 0.0813(8)  | 0.7063(7) | 1.2953(5) | 0.070(3) |
| H18a | 0.0763     | 0.7394    | 1.3387    | 0.104    |
| H18b | 0.1393     | 0.6468    | 1.2925    | 0.104    |
| H18c | 0.0194     | 0.6976    | 1.2973    | 0.104    |
| C19  | 0.0034(7)  | 0.8616(7) | 1.2297(5) | 0.068(2) |
| H19a | -0.0017    | 0.8938    | 1.2738    | 0.102    |
| H19b | -0.0594    | 0.8552    | 1.2301    | 0.102    |
| H19c | 0.0150     | 0.8963    | 1.1876    | 0.102    |
| C20  | 0.2503(8)  | 1.0066(6) | 1.1625(4) | 0.066(3) |
| H20a | 0.1915     | 0.9996    | 1.1898    | 0.098    |
| H20b | 0.2313     | 1.0707    | 1.1504    | 0.098    |
| H20c | 0.3041     | 0.9867    | 1.1918    | 0.098    |
| C21  | 0.4247(7)  | 1.1398(6) | 0.9721(4) | 0.057(2) |
| H21a | 0.4656     | 1.1602    | 0.9343    | 0.076    |
| H21b | 0.3539     | 1.1860    | 0.9770    | 0.076    |
| C22  | 0.4624(11) | 1.1348(7) | 1.0442(6) | 0.099(4) |
| H22a | 0.4568     | 1.1949    | 1.0566    | 0.148    |
| H22b | 0.5330     | 1.0905    | 1.0395    | 0.148    |
| H22c | 0.4213     | 1.1160    | 1.0823    | 0.148    |
| C23  | 0.3107(6)  | 1.1228(5) | 0.8544(4) | 0.047(2) |
| H23a | 0.3098     | 1.1817    | 0.8648    | 0.071    |
| H23b | 0.2547     | 1.1155    | 0.8859    | 0.071    |
| H23c | 0.3035     | 1.1204    | 0.8039    | 0.071    |
| C24  | 0.4982(7)  | 0.4553(6) | 0.8594(4) | 0.051(2) |
| H24a | 0.5004     | 0.4947    | 0.8183    | 0.077    |
| H24b | 0.4343     | 0.4493    | 0.8668    | 0.077    |
| H24c | 0.5545     | 0.3950    | 0.8496    | 0.077    |
| C25  | 0.6345(6)  | 0.5190(7) | 0.9258(5) | 0.062(2) |
| H25a | 0.6358     | 0.5573    | 0.8838    | 0.093    |
| H25b | 0.6906     | 0.4586    | 0.9165    | 0.093    |
| H25c | 0.6411     | 0.5471    | 0.9682    | 0.093    |
| C26  | 0.5058(6)  | 0.4326(5) | 1.0255(4) | 0.048(2) |
| C27  | 0.5852(8)  | 0.3322(6) | 1.0087(6) | 0.079(3) |
| H27a | 0.6525     | 0.3310    | 0.9941    | 0.118    |
| H27b | 0.5684     | 0.3069    | 0.9695    | 0.118    |
| H27c | 0.5847     | 0.2957    | 1.0519    | 0.118    |
| C28  | 0.3982(8)  | 0.4343(8) | 1.0484(7) | 0.094(3) |
| H28a | 0.3483     | 0.4972    | 1.0590    | 0.141    |
| H28b | 0.3976     | 0.3976    | 1.0915    | 0.141    |

|                |           |            |             |            |
|----------------|-----------|------------|-------------|------------|
| H28c           | 0.3816    | 0.4092     | 1.0090      | 0.141      |
| C29            | 0.5334(9) | 0.4687(7)  | 1.0913(5)   | 0.079(3)   |
| H29a           | 0.4842    | 0.5314     | 1.1037      | 0.118      |
| H29b           | 0.6010    | 0.4670     | 1.0780      | 0.118      |
| H29c           | 0.5321    | 0.4299     | 1.1329      | 0.118      |
| C30            | 0.2725(6) | 0.6762(5)  | 0.8984(4)   | 0.041(2)   |
| H30a           | 0.2270    | 0.6634     | 0.9371      | 0.061      |
| H30b           | 0.3067    | 0.6241     | 0.8647      | 0.061      |
| H30c           | 0.2335    | 0.7304     | 0.8728      | 0.061      |
| C31            | 0.1394(7) | 0.8987(7)  | 0.9782(5)   | 0.072(3)   |
| H31a           | 0.1132    | 0.9570     | 0.9537      | 0.108      |
| H31b           | 0.1171    | 0.9090     | 1.0304      | 0.108      |
| H31c           | 0.1139    | 0.8580     | 0.9612      | 0.108      |
| Molecule No. 2 |           |            |             |            |
| Si1            | 0.7514(2) | 0.2121(2)  | 0.29831(10) | 0.0440(5)  |
| Si2            | 0.7361(2) | -0.0654(2) | 0.55262(12) | 0.0503(6)  |
| O1             | 0.4196(3) | 0.5025(3)  | 0.5299(2)   | 0.0295(10) |
| O2             | 0.3914(4) | 0.3917(4)  | 0.4784(3)   | 0.0489(14) |
| O3             | 0.7045(3) | 0.2699(3)  | 0.3787(2)   | 0.0330(11) |
| O4             | 0.2380(4) | 0.5461(3)  | 0.7037(2)   | 0.0407(12) |
| H4             | 0.1946    | 0.5983     | 0.6972      | 0.061      |
| O5             | 0.4425(6) | 0.2312(4)  | 0.7773(4)   | 0.091(2)   |
| O6             | 0.7153(4) | 0.0444(3)  | 0.5435(2)   | 0.0444(13) |
| O7             | 0.7029(4) | 0.2768(3)  | 0.5544(2)   | 0.0401(12) |
| C1             | 0.6039(5) | 0.2925(5)  | 0.4198(3)   | 0.032(2)   |
| H1             | 0.5612    | 0.2859     | 0.3869      | 0.042      |
| C2             | 0.5583(5) | 0.3964(5)  | 0.4439(3)   | 0.034(2)   |
| H2             | 0.6001    | 0.4035     | 0.4774      | 0.045      |
| C3             | 0.4480(5) | 0.4271(4)  | 0.4846(3)   | 0.028(2)   |
| C4             | 0.3175(6) | 0.5358(5)  | 0.5763(3)   | 0.036(2)   |
| H4a            | 0.2856    | 0.4943     | 0.5688      | 0.047      |
| C5             | 0.3325(5) | 0.5310(5)  | 0.6575(3)   | 0.034(2)   |
| C6             | 0.4127(5) | 0.4332(4)  | 0.6710(3)   | 0.0249(14) |
| H6             | 0.4795    | 0.4152     | 0.6455      | 0.033      |
| C7             | 0.3939(6) | 0.3727(5)  | 0.7160(4)   | 0.041(2)   |
| H7             | 0.3269    | 0.3914     | 0.7410      | 0.055      |
| C8             | 0.4693(6) | 0.2777(5)  | 0.7306(4)   | 0.049(2)   |
| C9             | 0.5767(6) | 0.2410(5)  | 0.6897(3)   | 0.040(2)   |
| H9a            | 0.6240    | 0.2251     | 0.7245      | 0.053      |
| H9b            | 0.5853    | 0.2891     | 0.6583      | 0.053      |
| C10            | 0.6040(6) | 0.1541(5)  | 0.6418(4)   | 0.040(2)   |
| H10a           | 0.6101    | 0.1025     | 0.6742      | 0.053      |
| H10b           | 0.5470    | 0.1659     | 0.6161      | 0.053      |
| C11            | 0.7037(6) | 0.1243(4)  | 0.5843(3)   | 0.036(2)   |
| C12            | 0.7004(6) | 0.1960(4)  | 0.5230(3)   | 0.030(2)   |
| H12            | 0.7626    | 0.1674     | 0.4860      | 0.040      |

|      |            |            |           |          |
|------|------------|------------|-----------|----------|
| C13  | 0.6073(6)  | 0.2261(5)  | 0.4841(3) | 0.034(2) |
| H13a | 0.5455     | 0.2560     | 0.5202    | 0.046    |
| H13b | 0.6056     | 0.1709     | 0.4657    | 0.046    |
| C14  | 0.7438(7)  | 0.0971(6)  | 0.3074(5) | 0.068(2) |
| H14a | 0.6729     | 0.1069     | 0.3186    | 0.102    |
| H14b | 0.7791     | 0.0631     | 0.3463    | 0.102    |
| H14c | 0.7754     | 0.0623     | 0.2620    | 0.102    |
| C15  | 0.6766(7)  | 0.2799(8)  | 0.2249(4) | 0.081(3) |
| H15a | 0.6805     | 0.3388     | 0.2196    | 0.121    |
| H15b | 0.6059     | 0.2899     | 0.2387    | 0.121    |
| H15c | 0.7052     | 0.2457     | 0.1791    | 0.121    |
| C16  | 0.8887(6)  | 0.2012(6)  | 0.2750(4) | 0.051(2) |
| C17  | 0.9518(7)  | 0.1343(7)  | 0.3318(5) | 0.069(3) |
| H17a | 0.9500     | 0.0748     | 0.3289    | 0.103    |
| H17b | 0.9221     | 0.1601     | 0.3806    | 0.103    |
| H17c | 1.0219     | 0.1268     | 0.3208    | 0.103    |
| C18  | 0.9376(7)  | 0.1585(9)  | 0.1983(4) | 0.086(3) |
| H18a | 0.9358     | 0.0990     | 0.1959    | 0.130    |
| H18b | 1.0078     | 0.1508     | 0.1881    | 0.130    |
| H18c | 0.9002     | 0.1987     | 0.1627    | 0.130    |
| C19  | 0.8910(8)  | 0.2971(8)  | 0.2801(5) | 0.077(3) |
| H19a | 0.8521     | 0.3382     | 0.2455    | 0.116    |
| H19b | 0.9609     | 0.2900     | 0.2691    | 0.116    |
| H19c | 0.8613     | 0.3227     | 0.3290    | 0.116    |
| C20  | 0.5554(7)  | 0.4616(6)  | 0.3797(4) | 0.054(2) |
| H20a | 0.6238     | 0.4444     | 0.3530    | 0.081    |
| H20b | 0.5283     | 0.5243     | 0.3982    | 0.081    |
| H20c | 0.5122     | 0.4574     | 0.3476    | 0.081    |
| C21  | 0.2525(6)  | 0.6329(6)  | 0.5501(4) | 0.051(2) |
| H21a | 0.2893     | 0.6715     | 0.5499    | 0.068    |
| H21b | 0.1886     | 0.6608     | 0.5846    | 0.068    |
| C22  | 0.2279(7)  | 0.6311(7)  | 0.4727(4) | 0.076(3) |
| H22a | 0.1883     | 0.6934     | 0.4584    | 0.113    |
| H22b | 0.1890     | 0.5950     | 0.4730    | 0.113    |
| H22c | 0.2909     | 0.6037     | 0.4383    | 0.113    |
| C23  | 0.3725(6)  | 0.6024(5)  | 0.6748(4) | 0.037(2) |
| H23a | 0.3232     | 0.6641     | 0.6667    | 0.056    |
| H23b | 0.4369     | 0.5903     | 0.6432    | 0.056    |
| H23c | 0.3824     | 0.5971     | 0.7253    | 0.056    |
| C24  | 0.6833(11) | -0.0913(8) | 0.6454(6) | 0.107(4) |
| H24a | 0.7195     | -0.0825    | 0.6809    | 0.160    |
| H24b | 0.6915     | -0.1546    | 0.6462    | 0.160    |
| H24c | 0.6115     | -0.0504    | 0.6571    | 0.160    |
| C25  | 0.6643(8)  | -0.0833(7) | 0.4825(6) | 0.088(3) |
| H25a | 0.6911     | -0.0694    | 0.4343    | 0.132    |
| H25b | 0.5924     | -0.0428    | 0.4946    | 0.132    |

|                |           |            |             |            |
|----------------|-----------|------------|-------------|------------|
| H25c           | 0.6731    | -0.1467    | 0.4832      | 0.132      |
| C26            | 0.8785(6) | -0.1466(6) | 0.5261(5)   | 0.052(2)   |
| C27            | 0.9395(8) | -0.1573(7) | 0.5891(5)   | 0.082(3)   |
| H27a           | 0.9325    | -0.0973    | 0.6030      | 0.122      |
| H27b           | 1.0109    | -0.1968    | 0.5728      | 0.122      |
| H27c           | 0.9130    | -0.1844    | 0.6306      | 0.122      |
| C28            | 0.8900(8) | -0.2430(6) | 0.5027(6)   | 0.081(3)   |
| H28a           | 0.8599    | -0.2690    | 0.5431      | 0.122      |
| H28b           | 0.9618    | -0.2834    | 0.4892      | 0.122      |
| H28c           | 0.8556    | -0.2364    | 0.4615      | 0.122      |
| C29            | 0.9263(7) | -0.1026(7) | 0.4611(5)   | 0.072(3)   |
| H29a           | 0.9203    | -0.0436    | 0.4768      | 0.108      |
| H29b           | 0.8904    | -0.0939    | 0.4204      | 0.108      |
| H29c           | 0.9977    | -0.1432    | 0.4463      | 0.108      |
| C30            | 0.7979(6) | 0.0987(5)  | 0.6214(4)   | 0.050(2)   |
| H30a           | 0.7983    | 0.0544     | 0.6592      | 0.075      |
| H30b           | 0.7951    | 0.1535     | 0.6429      | 0.075      |
| H30c           | 0.8593    | 0.0719     | 0.5855      | 0.075      |
| C31            | 0.7957(6) | 0.2899(5)  | 0.5240(4)   | 0.043(2)   |
| H31a           | 0.7935    | 0.3438     | 0.5466      | 0.065      |
| H31b           | 0.7992    | 0.2982     | 0.4719      | 0.065      |
| H31c           | 0.8554    | 0.2362     | 0.5337      | 0.065      |
| Molecule No. 3 |           |            |             |            |
| Si1            | 0.7499(3) | 0.7114(2)  | 1.1990(2)   | 0.0865(9)  |
| Si2            | 1.0700(2) | 0.4488(2)  | 0.96413(14) | 0.0557(6)  |
| O1             | 0.7960(3) | 1.0009(3)  | 0.9724(2)   | 0.0351(11) |
| O2             | 0.9163(5) | 0.9295(5)  | 1.0454(3)   | 0.071(2)   |
| O3             | 0.7435(4) | 0.7717(4)  | 1.1215(2)   | 0.0509(13) |
| O4             | 0.9158(4) | 1.0621(3)  | 0.7968(3)   | 0.0464(13) |
| H4             | 0.8933    | 1.1183     | 0.8040      | 0.070      |
| O5             | 1.1194(4) | 0.7347(4)  | 0.7361(3)   | 0.062(2)   |
| O6             | 0.9824(4) | 0.5574(3)  | 0.9637(2)   | 0.0398(12) |
| O7             | 0.7882(4) | 0.7853(3)  | 0.9295(2)   | 0.0458(13) |
| C1             | 0.8172(6) | 0.8047(5)  | 1.0882(3)   | 0.038(2)   |
| H1             | 0.8578    | 0.8036     | 1.1257      | 0.051      |
| C2             | 0.7579(6) | 0.9088(5)  | 1.0681(4)   | 0.041(2)   |
| H2             | 0.7103    | 0.9126     | 1.0351      | 0.055      |
| C3             | 0.8335(6) | 0.9452(6)  | 1.0288(4)   | 0.045(2)   |
| C4             | 0.8621(6) | 1.0398(5)  | 0.9271(3)   | 0.034(2)   |
| H4a            | 0.9337    | 1.0039     | 0.9341      | 0.046      |
| C5             | 0.8523(5) | 1.0262(5)  | 0.8448(3)   | 0.034(2)   |
| C6             | 0.8958(5) | 0.9233(5)  | 0.8299(3)   | 0.033(2)   |
| H6             | 0.8581    | 0.8910     | 0.8521      | 0.044      |
| C7             | 0.9867(6) | 0.8753(5)  | 0.7859(4)   | 0.045(2)   |
| H7             | 1.0240    | 0.9079     | 0.7639      | 0.060      |
| C8             | 1.0308(6) | 0.7739(5)  | 0.7707(4)   | 0.042(2)   |

|      |            |            |           |          |
|------|------------|------------|-----------|----------|
| C9   | 0.9691(6)  | 0.7169(5)  | 0.7993(3) | 0.039(2) |
| H9a  | 0.9753     | 0.6750     | 0.7607    | 0.052    |
| H9b  | 0.8968     | 0.7585     | 0.8128    | 0.052    |
| C10  | 1.0096(6)  | 0.6596(6)  | 0.8679(4) | 0.043(2) |
| H10a | 1.0721     | 0.6048     | 0.8512    | 0.057    |
| H10b | 1.0267     | 0.6969     | 0.8982    | 0.057    |
| C11  | 0.9300(6)  | 0.6288(5)  | 0.9154(3) | 0.033(2) |
| C12  | 0.8455(6)  | 0.7079(5)  | 0.9711(3) | 0.036(2) |
| H12  | 0.7984     | 0.6836     | 0.9989    | 0.048    |
| C13  | 0.8925(6)  | 0.7394(5)  | 1.0246(3) | 0.036(2) |
| H13a | 0.9318     | 0.7707     | 0.9972    | 0.049    |
| H13b | 0.9407     | 0.6846     | 1.0457    | 0.049    |
| C14  | 0.8718(11) | 0.6001(8)  | 1.1870(7) | 0.110(4) |
| H14a | 0.9305     | 0.6145     | 1.1811    | 0.165    |
| H14b | 0.8752     | 0.5666     | 1.1442    | 0.165    |
| H14c | 0.8718     | 0.5626     | 1.2297    | 0.165    |
| C15  | 0.7560(10) | 0.7817(9)  | 1.2790(5) | 0.093(3) |
| H15a | 0.8182     | 0.7906     | 1.2686    | 0.139    |
| H15b | 0.7551     | 0.7482     | 1.3239    | 0.139    |
| H15c | 0.6976     | 0.8410     | 1.2841    | 0.139    |
| C16  | 0.6408(11) | 0.6869(8)  | 1.2097(6) | 0.095(3) |
| C17  | 0.6262(11) | 0.6559(10) | 1.1367(6) | 0.110(4) |
| H17a | 0.6253     | 0.7014     | 1.1000    | 0.164    |
| H17b | 0.5622     | 0.6500     | 1.1437    | 0.164    |
| H17c | 0.6820     | 0.5971     | 1.1210    | 0.164    |
| C18  | 0.634(2)   | 0.625(2)   | 1.2767(9) | 0.193(8) |
| H18a | 0.6396     | 0.6525     | 1.3200    | 0.290    |
| H18b | 0.6893     | 0.5643     | 1.2680    | 0.290    |
| H18c | 0.5693     | 0.6209     | 1.2837    | 0.290    |
| C19  | 0.5393(11) | 0.7888(13) | 1.2385(7) | 0.136(5) |
| H19a | 0.5329     | 0.8339     | 1.2006    | 0.204    |
| H19b | 0.5502     | 0.8109     | 1.2822    | 0.204    |
| H19c | 0.4774     | 0.7793     | 1.2491    | 0.204    |
| C20  | 0.6967(7)  | 0.9689(6)  | 1.1360(4) | 0.056(2) |
| H20a | 0.6477     | 0.9467     | 1.1607    | 0.084    |
| H20b | 0.6611     | 1.0320     | 1.1218    | 0.084    |
| H20c | 0.7427     | 0.9660     | 1.1686    | 0.084    |
| C21  | 0.8270(7)  | 1.1412(5)  | 0.9501(4) | 0.048(2) |
| H21a | 0.8610     | 1.1699     | 0.9138    | 0.063    |
| H21b | 0.7534     | 1.1741     | 0.9505    | 0.063    |
| C22  | 0.8495(9)  | 1.1518(7)  | 1.0243(5) | 0.078(3) |
| H22a | 0.8252     | 1.2166     | 1.0360    | 0.118    |
| H22b | 0.9225     | 1.1213     | 1.0239    | 0.118    |
| H22C | 0.8154     | 1.1243     | 1.0607    | 0.118    |
| C23  | 0.7414(6)  | 1.0725(5)  | 0.8328(4) | 0.041(2) |
| H23a | 0.7147     | 1.1382     | 0.8420    | 0.062    |



|                |            |            |             |            |
|----------------|------------|------------|-------------|------------|
| H23b           | 0.7013     | 1.0472     | 0.8658      | 0.062      |
| H23c           | 0.7381     | 1.0615     | 0.7829      | 0.062      |
| C24            | 1.1704(9)  | 0.4168(8)  | 0.8843(7)   | 0.123(5)   |
| H24a           | 1.1969     | 0.4632     | 0.8766      | 0.184      |
| H24b           | 1.1427     | 0.4124     | 0.8418      | 0.184      |
| H24c           | 1.2249     | 0.3578     | 0.8921      | 0.184      |
| C25            | 1.1326(10) | 0.4462(8)  | 1.0469(7)   | 0.106(4)   |
| H25a           | 1.0814     | 0.4622     | 1.0906      | 0.159      |
| H25b           | 1.1626     | 0.4900     | 1.0405      | 0.159      |
| H25c           | 1.1852     | 0.3849     | 1.0514      | 0.159      |
| C26            | 1.0079(8)  | 0.3637(7)  | 0.9865(6)   | 0.077(2)   |
| C27            | 0.9811(12) | 0.3388(10) | 0.9139(6)   | 0.119(4)   |
| H27a           | 1.0430     | 0.3107     | 0.8786      | 0.178      |
| H27b           | 0.9341     | 0.3945     | 0.8940      | 0.178      |
| H27c           | 0.9498     | 0.2961     | 0.9248      | 0.178      |
| C28            | 1.0832(8)  | 0.2754(7)  | 1.0176(5)   | 0.083(3)   |
| H28a           | 1.1469     | 0.2504     | 0.9837      | 0.125      |
| H28b           | 1.0545     | 0.2306     | 1.0249      | 0.125      |
| H28c           | 1.0956     | 0.2897     | 1.0638      | 0.125      |
| C29            | 0.9089(7)  | 0.4055(7)  | 1.0370(6)   | 0.075(3)   |
| H29a           | 0.8639     | 0.4615     | 1.0162      | 0.113      |
| H29b           | 0.9204     | 0.4197     | 1.0835      | 0.113      |
| H29c           | 0.8778     | 0.3624     | 1.0440      | 0.113      |
| C30            | 0.8777(7)  | 0.5925(6)  | 0.8688(4)   | 0.051(2)   |
| H30a           | 0.8288     | 0.5752     | 0.9004      | 0.076      |
| H30b           | 0.9285     | 0.5392     | 0.8405      | 0.076      |
| H30c           | 0.8427     | 0.6401     | 0.8363      | 0.076      |
| C31            | 0.6820(7)  | 0.7997(8)  | 0.9321(6)   | 0.082(3)   |
| H31a           | 0.6483     | 0.8520     | 0.9027      | 0.123      |
| H31b           | 0.6468     | 0.8114     | 0.9821      | 0.123      |
| H31c           | 0.6808     | 0.7452     | 0.9132      | 0.123      |
| Molecule No. 4 |            |            |             |            |
| Si1            | 1.2507(2)  | 0.2643(2)  | 0.36584(13) | 0.0601(7)  |
| Si2            | 1.2341(3)  | 0.0448(3)  | 0.6189(2)   | 0.1166(14) |
| O1             | 0.8314(4)  | 0.5434(3)  | 0.5407(2)   | 0.0415(12) |
| O2             | 0.8251(4)  | 0.4600(4)  | 0.4468(3)   | 0.055(2)   |
| O3             | 1.1564(4)  | 0.3531(4)  | 0.4145(3)   | 0.0490(13) |
| O4             | 0.6187(4)  | 0.5732(3)  | 0.6935(2)   | 0.0424(12) |
| H4             | 0.5781     | 0.6261     | 0.6855      | 0.064      |
| O5             | 0.8059(4)  | 0.2565(4)  | 0.7748(3)   | 0.058(2)   |
| O6             | 1.1647(5)  | 0.1497(6)  | 0.5937(4)   | 0.089(2)   |
| O7             | 1.0487(5)  | 0.4047(5)  | 0.6060(3)   | 0.073(2)   |
| C1             | 1.0535(6)  | 0.3675(5)  | 0.4433(4)   | 0.038(2)   |
| H1             | 1.0294     | 0.3459     | 0.4048      | 0.051      |
| C2             | 0.9856(6)  | 0.4718(5)  | 0.4532(4)   | 0.049(2)   |
| H2             | 1.0080     | 0.4969     | 0.4905      | 0.066      |

|      |            |            |           |          |
|------|------------|------------|-----------|----------|
| C3   | 0.8711(7)  | 0.4896(6)  | 0.4790(4) | 0.047(2) |
| C4   | 0.7240(6)  | 0.5657(5)  | 0.5742(4) | 0.036(2) |
| H4a  | 0.7040     | 0.5193     | 0.5576    | 0.047    |
| C5   | 0.7221(6)  | 0.5579(5)  | 0.6579(3) | 0.036(2) |
| C6   | 0.7913(6)  | 0.4592(5)  | 0.6755(4) | 0.044(2) |
| H6   | 0.8599     | 0.4373     | 0.6531    | 0.058    |
| C7   | 0.7655(6)  | 0.3996(5)  | 0.7196(4) | 0.038(2) |
| H7   | 0.6967     | 0.4190     | 0.7407    | 0.051    |
| C8   | 0.8370(7)  | 0.3076(6)  | 0.7366(4) | 0.054(2) |
| C9   | 0.9571(8)  | 0.2905(7)  | 0.7264(5) | 0.085(3) |
| H9a  | 0.9649     | 0.3479     | 0.7162    | 0.113    |
| H9b  | 0.9873     | 0.2624     | 0.7695    | 0.113    |
| C10  | 1.0026(9)  | 0.2259(8)  | 0.6620(5) | 0.096(3) |
| H10a | 0.9586     | 0.2447     | 0.6247    | 0.128    |
| H10b | 1.0151     | 0.1627     | 0.6763    | 0.128    |
| C11  | 1.1160(8)  | 0.2362(9)  | 0.6318(5) | 0.100(3) |
| C12  | 1.1042(7)  | 0.3135(7)  | 0.5717(4) | 0.065(2) |
| H12  | 1.1733     | 0.3068     | 0.5493    | 0.086    |
| C13  | 1.0489(6)  | 0.3063(5)  | 0.5100(4) | 0.040(2) |
| H13a | 0.9772     | 0.3227     | 0.5305    | 0.053    |
| H13b | 1.0790     | 0.2420     | 0.4930    | 0.053    |
| C14  | 1.3541(8)  | 0.1985(7)  | 0.4224(5) | 0.071(3) |
| H14a | 1.3264     | 0.1721     | 0.4638    | 0.106    |
| H14b | 1.3784     | 0.2401     | 0.4394    | 0.106    |
| H14c | 1.4101     | 0.1497     | 0.3927    | 0.106    |
| C15  | 1.2027(8)  | 0.1833(8)  | 0.3336(5) | 0.082(3) |
| H15a | 1.1752     | 0.1573     | 0.3754    | 0.123    |
| H15b | 1.2586     | 0.1341     | 0.3041    | 0.123    |
| H15c | 1.1498     | 0.2167     | 0.3048    | 0.123    |
| C16  | 1.3026(8)  | 0.3135(9)  | 0.2868(5) | 0.079(3) |
| C17  | 1.4113(9)  | 0.2332(11) | 0.2438(6) | 0.113(4) |
| H17a | 1.3998     | 0.1811     | 0.2309    | 0.169    |
| H17b | 1.4622     | 0.2131     | 0.2755    | 0.169    |
| H17c | 1.4352     | 0.2585     | 0.1999    | 0.169    |
| C18  | 1.2206(10) | 0.3564(11) | 0.2294(5) | 0.112(4) |
| H18a | 1.2028     | 0.3089     | 0.2149    | 0.168    |
| H18b | 1.2513     | 0.3785     | 0.1868    | 0.168    |
| H18c | 1.1596     | 0.4070     | 0.2530    | 0.168    |
| C19  | 1.3272(8)  | 0.3963(8)  | 0.3076(5) | 0.078(3) |
| H19a | 1.2655     | 0.4449     | 0.3326    | 0.116    |
| H19b | 1.3529     | 0.4201     | 0.2636    | 0.116    |
| H19c | 1.3782     | 0.3741     | 0.3393    | 0.116    |
| C20  | 0.9910(8)  | 0.5248(7)  | 0.3808(5) | 0.089(3) |
| H20a | 0.9484     | 0.5899     | 0.3895    | 0.133    |
| H20b | 0.9672     | 0.5018     | 0.3444    | 0.133    |
| H20c | 1.0610     | 0.5154     | 0.3634    | 0.133    |

|                                                                                                                                                        |            |             |            |          |
|--------------------------------------------------------------------------------------------------------------------------------------------------------|------------|-------------|------------|----------|
| C21                                                                                                                                                    | 0.6549(7)  | 0.6629(5)   | 0.5472(4)  | 0.052(2) |
| H21a                                                                                                                                                   | 0.5870     | 0.6833      | 0.5769     | 0.069    |
| H21b                                                                                                                                                   | 0.6828     | 0.7060      | 0.5569     | 0.069    |
| C22                                                                                                                                                    | 0.6431(10) | 0.6704(8)   | 0.4718(6)  | 0.103(4) |
| H22a                                                                                                                                                   | 0.5992     | 0.7334      | 0.4621     | 0.154    |
| H22b                                                                                                                                                   | 0.6128     | 0.6302      | 0.4613     | 0.154    |
| H22c                                                                                                                                                   | 0.7093     | 0.6526      | 0.4413     | 0.154    |
| C23                                                                                                                                                    | 0.7597(6)  | 0.6230(5)   | 0.6888(4)  | 0.047(2) |
| H23a                                                                                                                                                   | 0.7165     | 0.6863      | 0.6788     | 0.071    |
| H23b                                                                                                                                                   | 0.8294     | 0.6084      | 0.6659     | 0.071    |
| H23c                                                                                                                                                   | 0.7566     | 0.6153      | 0.7410     | 0.071    |
| C24                                                                                                                                                    | 1.1823(11) | 0.0191(12)  | 0.7135(8)  | 0.164(6) |
| H24a                                                                                                                                                   | 1.1865     | 0.0589      | 0.7488     | 0.246    |
| H24b                                                                                                                                                   | 1.2222     | -0.0446     | 0.7244     | 0.246    |
| H24c                                                                                                                                                   | 1.1118     | 0.0297      | 0.7158     | 0.246    |
| C25                                                                                                                                                    | 1.3715(8)  | 0.0266(9)   | 0.6198(6)  | 0.098(4) |
| H25a                                                                                                                                                   | 1.4005     | 0.0403      | 0.5723     | 0.146    |
| H25b                                                                                                                                                   | 1.4117     | -0.0368     | 0.6313     | 0.146    |
| H25c                                                                                                                                                   | 1.3720     | 0.0671      | 0.6563     | 0.146    |
| C26                                                                                                                                                    | 1.2263(12) | -0.0281(10) | 0.5495(8)  | 0.145(4) |
| C27                                                                                                                                                    | 1.276(2)   | -0.1328(13) | 0.569(2)   | 0.232(8) |
| H27a                                                                                                                                                   | 1.2380     | -0.1429     | 0.6142     | 0.349    |
| H27b                                                                                                                                                   | 1.3461     | -0.1501     | 0.5755     | 0.349    |
| H27c                                                                                                                                                   | 1.2754     | -0.1698     | 0.5303     | 0.349    |
| C28                                                                                                                                                    | 1.2959(14) | -0.0237(12) | 0.4757(9)  | 0.155(5) |
| H28a                                                                                                                                                   | 1.3637     | -0.0371     | 0.4849     | 0.233    |
| H28b                                                                                                                                                   | 1.2667     | 0.0373      | 0.4558     | 0.233    |
| H28c                                                                                                                                                   | 1.3001     | -0.0687     | 0.4411     | 0.233    |
| C29                                                                                                                                                    | 1.1172(14) | -0.006(2)   | 0.5375(14) | 0.224(8) |
| H29a                                                                                                                                                   | 1.0769     | -0.0115     | 0.5831     | 0.335    |
| H29b                                                                                                                                                   | 1.1198     | -0.0490     | 0.5018     | 0.335    |
| H29c                                                                                                                                                   | 1.0862     | 0.0561      | 0.5199     | 0.335    |
| C30                                                                                                                                                    | 1.1890(11) | 0.2435(12)  | 0.6813(7)  | 0.156(6) |
| H30a                                                                                                                                                   | 1.1965     | 0.1994      | 0.7202     | 0.234    |
| H30b                                                                                                                                                   | 1.1603     | 0.3051      | 0.7022     | 0.234    |
| H30c                                                                                                                                                   | 1.2552     | 0.2303      | 0.6521     | 0.234    |
| C31                                                                                                                                                    | 1.1044(10) | 0.4597(12)  | 0.6077(6)  | 0.128(6) |
| H31a                                                                                                                                                   | 1.0589     | 0.5188      | 0.6309     | 0.192    |
| H31b                                                                                                                                                   | 1.1321     | 0.4691      | 0.5583     | 0.192    |
| H31c                                                                                                                                                   | 1.1596     | 0.4284      | 0.6351     | 0.192    |
| $U_{eq} = 1/3[U_{11}(aa^*)^2 + U_{22}(bb^*)^2 + U_{33}(cc^*)^2 + 2U_{12}aa^*bb^* \cos\gamma + 2U_{13}aa^*cc^* \cos\beta + 2U_{23}bb^*cc^* \cos\alpha]$ |            |             |            |          |

**Table 3. Refined Thermal Parameters (U's) for Compound 99085**

| Atom           | U <sub>11</sub> | U <sub>22</sub> | U <sub>33</sub> | U <sub>23</sub> | U <sub>13</sub> | U <sub>12</sub> |
|----------------|-----------------|-----------------|-----------------|-----------------|-----------------|-----------------|
| Molecule No. 1 |                 |                 |                 |                 |                 |                 |
| Si1            | 0.065(2)        | 0.053(2)        | 0.0421(12)      | 0.0038(10)      | 0.0019(11)      | -<br>0.0297(13) |
| Si2            | 0.0366(13)      | 0.0348(12)      | 0.0403(11)      | 0.0009(9)       | -0.0057(9)      | -<br>0.0139(10) |
| O1             | 0.034(3)        | 0.025(3)        | 0.042(3)        | 0.003(2)        | -0.001(2)       | -0.007(2)       |
| O2             | 0.039(3)        | 0.048(3)        | 0.066(3)        | 0.029(3)        | -0.015(3)       | -0.016(3)       |
| O3             | 0.051(3)        | 0.049(3)        | 0.049(3)        | -0.002(2)       | 0.005(2)        | -0.030(3)       |
| O4             | 0.049(3)        | 0.021(3)        | 0.059(3)        | -0.004(2)       | 0.011(2)        | -0.014(2)       |
| O5             | 0.082(4)        | 0.036(3)        | 0.045(3)        | -0.004(2)       | 0.015(3)        | -0.023(3)       |
| O6             | 0.043(3)        | 0.030(3)        | 0.037(2)        | 0.003(2)        | -0.002(2)       | -0.014(2)       |
| O7             | 0.037(3)        | 0.033(3)        | 0.036(3)        | 0.000(2)        | -0.002(2)       | 0.002(2)        |
| C1             | 0.044(5)        | 0.032(4)        | 0.030(3)        | 0.004(3)        | 0.003(3)        | -0.019(4)       |
| C2             | 0.031(4)        | 0.027(4)        | 0.047(4)        | -0.010(3)       | 0.007(3)        | -0.003(3)       |
| C3             | 0.044(4)        | 0.023(4)        | 0.035(4)        | -0.003(3)       | -0.001(3)       | -0.017(4)       |
| C4             | 0.030(4)        | 0.029(4)        | 0.045(4)        | 0.004(3)        | -0.005(3)       | -0.014(3)       |
| C5             | 0.032(4)        | 0.020(4)        | 0.047(4)        | 0.002(3)        | -0.002(3)       | -0.010(3)       |
| C6             | 0.050(5)        | 0.031(4)        | 0.031(3)        | 0.015(3)        | -0.009(3)       | -0.022(4)       |
| C7             | 0.056(5)        | 0.026(4)        | 0.034(4)        | 0.012(3)        | 0.006(3)        | -0.011(4)       |
| C8             | 0.061(5)        | 0.026(4)        | 0.034(4)        | 0.005(3)        | -0.005(4)       | -0.006(4)       |
| C9             | 0.059(5)        | 0.020(4)        | 0.030(3)        | 0.000(3)        | -0.007(3)       | -0.011(4)       |
| C10            | 0.046(5)        | 0.024(4)        | 0.027(3)        | 0.000(2)        | -0.001(3)       | -0.011(3)       |
| C11            | 0.046(5)        | 0.033(4)        | 0.021(3)        | 0.009(3)        | -0.009(3)       | -0.020(3)       |
| C12            | 0.028(4)        | 0.033(4)        | 0.044(4)        | -0.001(3)       | -0.002(3)       | -0.006(3)       |
| C13            | 0.048(5)        | 0.034(4)        | 0.038(4)        | -0.004(3)       | -0.005(3)       | -0.023(4)       |
| C14            | 0.061(6)        | 0.066(6)        | 0.089(7)        | 0.015(5)        | -0.014(5)       | -0.009(5)       |
| C15            | 0.107(8)        | 0.089(7)        | 0.053(5)        | 0.007(4)        | -0.010(5)       | -0.064(6)       |
| C16            | 0.068(5)        | 0.056(5)        | 0.063(5)        | 0.011(4)        | -0.001(4)       | -0.040(4)       |
| C17            | 0.086(7)        | 0.111(8)        | 0.064(5)        | -0.002(5)       | 0.010(5)        | -0.069(7)       |
| C18            | 0.077(7)        | 0.077(7)        | 0.067(5)        | 0.021(4)        | -0.002(5)       | -0.049(6)       |
| C19            | 0.059(5)        | 0.072(6)        | 0.082(6)        | 0.001(4)        | -0.003(5)       | -0.040(4)       |
| C20            | 0.097(7)        | 0.032(5)        | 0.058(5)        | -0.013(3)       | 0.026(5)        | -0.030(5)       |
| C21            | 0.077(7)        | 0.041(5)        | 0.060(5)        | -0.004(4)       | -0.004(4)       | -0.033(5)       |
| C22            | 0.176(13)       | 0.062(7)        | 0.107(8)        | 0.015(6)        | -0.068(8)       | -0.081(8)       |
| C23            | 0.053(5)        | 0.036(4)        | 0.051(4)        | 0.013(3)        | -0.023(4)       | -0.014(4)       |
| C24            | 0.046(5)        | 0.043(5)        | 0.062(5)        | -0.012(4)       | -0.006(4)       | -0.016(4)       |
| C25            | 0.041(5)        | 0.078(7)        | 0.079(6)        | 0.002(5)        | -0.010(4)       | -0.037(5)       |
| C26            | 0.037(4)        | 0.033(4)        | 0.066(4)        | 0.003(3)        | -0.009(4)       | -0.008(4)       |
| C27            | 0.085(7)        | 0.035(5)        | 0.098(7)        | 0.000(4)        | -0.025(6)       | -0.005(5)       |
| C28            | 0.067(6)        | 0.076(7)        | 0.132(9)        | 0.058(7)        | 0.004(6)        | -0.037(5)       |
| C29            | 0.118(9)        | 0.051(6)        | 0.055(5)        | 0.015(4)        | -0.035(6)       | -0.018(6)       |
| C30            | 0.055(5)        | 0.038(5)        | 0.031(4)        | -0.002(3)       | -0.005(3)       | -0.022(4)       |

|                |            |            |            |            |            |                 |
|----------------|------------|------------|------------|------------|------------|-----------------|
| C31            | 0.043(5)   | 0.068(7)   | 0.080(6)   | -0.011(5)  | -0.014(5)  | 0.004(5)        |
| Molecule No. 2 |            |            |            |            |            |                 |
| Si1            | 0.0365(13) | 0.0512(14) | 0.0323(11) | -0.0067(9) | 0.0006(9)  | -<br>0.0083(11) |
| Si2            | 0.0489(14) | 0.0275(12) | 0.0638(14) | -0.0047(9) | 0.0136(11) | -<br>0.0139(11) |
| O1             | 0.032(3)   | 0.025(3)   | 0.028(2)   | 0.003(2)   | -0.003(2)  | -0.010(2)       |
| O2             | 0.031(3)   | 0.046(3)   | 0.070(3)   | -0.025(3)  | -0.002(3)  | -0.016(3)       |
| O3             | 0.030(3)   | 0.034(3)   | 0.029(2)   | 0.000(2)   | -0.001(2)  | -0.009(2)       |
| O4             | 0.031(3)   | 0.027(3)   | 0.048(3)   | -0.004(2)  | 0.005(2)   | -0.001(2)       |
| O5             | 0.110(5)   | 0.026(3)   | 0.093(4)   | 0.020(3)   | 0.037(4)   | -0.008(3)       |
| O6             | 0.069(4)   | 0.021(3)   | 0.034(2)   | -0.002(2)  | 0.009(2)   | -0.017(3)       |
| O7             | 0.058(3)   | 0.029(3)   | 0.041(3)   | 0.003(2)   | -0.011(2)  | -0.025(3)       |
| C1             | 0.028(4)   | 0.031(4)   | 0.037(4)   | 0.002(3)   | -0.009(3)  | -0.012(3)       |
| C2             | 0.031(4)   | 0.043(4)   | 0.031(4)   | 0.002(3)   | -0.002(3)  | -0.019(3)       |
| C3             | 0.033(4)   | 0.021(4)   | 0.031(3)   | 0.001(3)   | -0.009(3)  | -0.009(3)       |
| C4             | 0.039(4)   | 0.023(4)   | 0.035(3)   | 0.000(3)   | -0.002(3)  | -0.006(3)       |
| C5             | 0.031(4)   | 0.024(4)   | 0.034(3)   | -0.004(3)  | 0.006(3)   | -0.005(3)       |
| C6             | 0.015(3)   | 0.024(3)   | 0.030(3)   | -0.005(3)  | 0.009(3)   | -0.008(3)       |
| C7             | 0.052(5)   | 0.020(3)   | 0.045(4)   | -0.001(3)  | 0.008(4)   | -0.013(3)       |
| C8             | 0.061(5)   | 0.024(4)   | 0.044(4)   | -0.001(3)  | 0.012(4)   | -0.010(4)       |
| C9             | 0.056(5)   | 0.020(4)   | 0.027(3)   | 0.008(2)   | -0.004(3)  | -0.002(3)       |
| C10            | 0.050(4)   | 0.029(4)   | 0.036(4)   | 0.008(3)   | -0.002(3)  | -0.016(4)       |
| C11            | 0.052(5)   | 0.017(4)   | 0.034(4)   | -0.001(2)  | -0.006(3)  | -0.009(3)       |
| C12            | 0.039(4)   | 0.019(4)   | 0.032(3)   | -0.002(2)  | 0.003(3)   | -0.015(3)       |
| C13            | 0.044(5)   | 0.039(4)   | 0.030(3)   | -0.001(3)  | -0.007(3)  | -0.026(4)       |
| C14            | 0.061(6)   | 0.060(5)   | 0.079(6)   | -0.030(4)  | -0.005(5)  | -0.021(5)       |
| C15            | 0.058(6)   | 0.134(9)   | 0.043(5)   | 0.006(5)   | -0.023(4)  | -0.028(6)       |
| C16            | 0.033(4)   | 0.068(6)   | 0.046(4)   | -0.004(4)  | -0.007(3)  | -0.015(4)       |
| C17            | 0.039(5)   | 0.081(7)   | 0.071(5)   | 0.003(5)   | -0.014(4)  | -0.010(5)       |
| C18            | 0.045(6)   | 0.144(10)  | 0.042(4)   | -0.028(5)  | 0.021(4)   | -0.020(6)       |
| C19            | 0.072(7)   | 0.095(7)   | 0.076(6)   | 0.013(5)   | -0.006(5)  | -0.049(6)       |
| C20            | 0.058(6)   | 0.041(5)   | 0.049(4)   | 0.016(3)   | 0.005(4)   | -0.015(4)       |
| C21            | 0.048(5)   | 0.047(5)   | 0.033(4)   | 0.013(3)   | 0.003(4)   | 0.000(4)        |
| C22            | 0.060(6)   | 0.096(8)   | 0.042(5)   | 0.015(4)   | -0.015(4)  | -0.004(6)       |
| C23            | 0.042(5)   | 0.027(4)   | 0.040(4)   | -0.003(3)  | -0.001(3)  | -0.013(4)       |
| C24            | 0.150(10)  | 0.062(7)   | 0.096(6)   | -0.002(5)  | 0.061(6)   | -0.063(8)       |
| C25            | 0.076(7)   | 0.055(7)   | 0.148(8)   | -0.006(6)  | -0.037(7)  | -0.035(6)       |
| C26            | 0.042(4)   | 0.031(4)   | 0.072(5)   | -0.009(4)  | 0.000(4)   | -0.007(4)       |
| C27            | 0.074(6)   | 0.053(6)   | 0.083(6)   | -0.011(5)  | -0.017(5)  | 0.010(5)        |
| C28            | 0.079(7)   | 0.026(5)   | 0.114(8)   | -0.022(4)  | 0.001(6)   | -0.002(4)       |
| C29            | 0.046(5)   | 0.066(6)   | 0.084(6)   | -0.001(5)  | 0.018(5)   | -0.015(5)       |
| C30            | 0.056(5)   | 0.034(5)   | 0.043(4)   | -0.001(3)  | -0.005(4)  | -0.004(4)       |
| C31            | 0.046(5)   | 0.042(5)   | 0.051(4)   | 0.007(3)   | -0.015(4)  | -0.024(4)       |
| Molecule No. 3 |            |            |            |            |            |                 |
| Si1            | 0.117(3)   | 0.082(2)   | 0.062(2)   | 0.024(2)   | -0.004(2)  | -0.051(2)       |

|                |            |            |            |            |            |            |            |
|----------------|------------|------------|------------|------------|------------|------------|------------|
| Si2            | 0.0390(14) | 0.0346(13) | 0.084(2)   | 0.0029(11) | 0.0009(12) | -          | 0.0112(11) |
| O1             | 0.035(3)   | 0.030(3)   | 0.033(2)   | 0.004(2)   | -0.004(2)  | -0.007(2)  | -0.007(2)  |
| O2             | 0.063(4)   | 0.096(5)   | 0.074(4)   | 0.046(3)   | -0.039(3)  | -0.047(4)  | -0.047(4)  |
| O3             | 0.061(3)   | 0.056(3)   | 0.038(3)   | 0.005(2)   | 0.003(2)   | -0.032(3)  | -0.032(3)  |
| O4             | 0.049(3)   | 0.026(3)   | 0.054(3)   | 0.013(2)   | 0.004(2)   | -0.013(3)  | -0.013(3)  |
| O5             | 0.054(4)   | 0.027(3)   | 0.074(4)   | -0.002(3)  | 0.022(3)   | -0.001(3)  | -0.001(3)  |
| O6             | 0.043(3)   | 0.031(3)   | 0.042(3)   | 0.004(2)   | -0.007(2)  | -0.014(2)  | -0.014(2)  |
| O7             | 0.033(3)   | 0.041(3)   | 0.042(3)   | 0.005(2)   | -0.005(2)  | 0.004(2)   | 0.004(2)   |
| C1             | 0.054(5)   | 0.042(4)   | 0.023(3)   | 0.001(3)   | -0.007(3)  | -0.024(4)  | -0.024(4)  |
| C2             | 0.039(4)   | 0.045(4)   | 0.032(4)   | 0.001(3)   | -0.001(3)  | -0.012(3)  | -0.012(3)  |
| C3             | 0.043(5)   | 0.046(5)   | 0.040(4)   | 0.012(3)   | -0.009(3)  | -0.015(4)  | -0.015(4)  |
| C4             | 0.032(4)   | 0.031(4)   | 0.039(3)   | 0.007(3)   | -0.004(3)  | -0.013(3)  | -0.013(3)  |
| C5             | 0.028(4)   | 0.029(4)   | 0.032(3)   | 0.002(3)   | 0.002(3)   | -0.004(3)  | -0.004(3)  |
| C6             | 0.032(4)   | 0.029(4)   | 0.033(4)   | 0.007(3)   | 0.000(3)   | -0.012(3)  | -0.012(3)  |
| C7             | 0.050(5)   | 0.030(4)   | 0.044(4)   | 0.003(3)   | 0.016(4)   | -0.016(3)  | -0.016(3)  |
| C8             | 0.035(4)   | 0.028(4)   | 0.042(4)   | 0.001(3)   | 0.002(3)   | 0.002(3)   | 0.002(3)   |
| C9             | 0.054(5)   | 0.020(4)   | 0.032(4)   | -0.002(3)  | -0.003(3)  | -0.007(3)  | -0.007(3)  |
| C10            | 0.033(4)   | 0.043(5)   | 0.050(4)   | 0.004(3)   | -0.010(3)  | -0.012(4)  | -0.012(4)  |
| C11            | 0.044(4)   | 0.032(4)   | 0.024(3)   | 0.004(2)   | -0.003(3)  | -0.018(3)  | -0.018(3)  |
| C12            | 0.041(4)   | 0.032(4)   | 0.033(4)   | 0.010(3)   | -0.008(3)  | -0.014(3)  | -0.014(3)  |
| C13            | 0.045(5)   | 0.023(4)   | 0.032(4)   | 0.002(3)   | -0.005(3)  | -0.006(3)  | -0.006(3)  |
| C14            | 0.139(8)   | 0.076(7)   | 0.112(9)   | 0.031(5)   | -0.059(8)  | -0.030(6)  | -0.030(6)  |
| C15            | 0.125(10)  | 0.130(9)   | 0.051(5)   | 0.022(5)   | -0.036(6)  | -0.075(8)  | -0.075(8)  |
| C16            | 0.138(8)   | 0.086(7)   | 0.088(7)   | 0.026(5)   | -0.031(7)  | -0.070(6)  | -0.070(6)  |
| C17            | 0.150(12)  | 0.149(12)  | 0.081(6)   | -0.006(6)  | 0.000(7)   | -0.118(11) | -0.118(11) |
| C18            | 0.23(2)    | 0.26(2)    | 0.169(12)  | 0.15(2)    | -0.08(2)   | -0.19(2)   | -0.19(2)   |
| C19            | 0.102(7)   | 0.183(12)  | 0.104(9)   | -0.027(8)  | 0.013(8)   | -0.051(8)  | -0.051(8)  |
| C20            | 0.068(6)   | 0.045(5)   | 0.042(4)   | -0.001(3)  | -0.003(4)  | -0.014(4)  | -0.014(4)  |
| C21            | 0.054(5)   | 0.037(4)   | 0.046(4)   | -0.007(3)  | -0.002(4)  | -0.015(4)  | -0.015(4)  |
| C22            | 0.110(9)   | 0.050(6)   | 0.077(6)   | -0.005(4)  | -0.027(6)  | -0.031(6)  | -0.031(6)  |
| C23            | 0.040(4)   | 0.040(5)   | 0.034(4)   | 0.014(3)   | -0.015(3)  | -0.006(4)  | -0.006(4)  |
| C24            | 0.095(8)   | 0.054(7)   | 0.142(8)   | 0.027(6)   | 0.060(7)   | 0.009(6)   | 0.009(6)   |
| C25            | 0.091(9)   | 0.076(8)   | 0.146(8)   | 0.025(7)   | -0.078(8)  | -0.011(7)  | -0.011(7)  |
| C26            | 0.084(7)   | 0.045(5)   | 0.095(6)   | 0.003(4)   | 0.011(5)   | -0.031(5)  | -0.031(5)  |
| C27            | 0.173(14)  | 0.104(10)  | 0.107(8)   | -0.015(7)  | -0.018(7)  | -0.085(10) | -0.085(10) |
| C28            | 0.093(7)   | 0.041(5)   | 0.092(7)   | 0.014(5)   | 0.020(5)   | -0.021(5)  | -0.021(5)  |
| C29            | 0.060(6)   | 0.071(7)   | 0.099(7)   | -0.003(5)  | 0.009(5)   | -0.040(5)  | -0.040(5)  |
| C30            | 0.051(5)   | 0.049(5)   | 0.054(5)   | -0.004(4)  | -0.011(4)  | -0.021(4)  | -0.021(4)  |
| C31            | 0.045(5)   | 0.087(8)   | 0.087(7)   | -0.036(6)  | -0.029(5)  | 0.009(5)   | 0.009(5)   |
| Molecule no. 4 |            |            |            |            |            |            |            |
| Si1            | 0.056(2)   | 0.067(2)   | 0.0595(14) | -          | -          | -          | -          |
| Si2            | 0.070(2)   | 0.124(3)   | 0.165(3)   | 0.0077(12) | 0.0087(12) | 0.0273(14) | 0.0273(14) |
| O1             | 0.049(3)   | 0.043(3)   | 0.038(3)   | 0.002(2)   | 0.004(2)   | -0.028(3)  | -0.028(3)  |
| O2             | 0.058(4)   | 0.050(4)   | 0.054(3)   | -0.009(3)  | -0.009(3)  | -0.021(3)  | -0.021(3)  |

|     |           |           |          |           |            |            |
|-----|-----------|-----------|----------|-----------|------------|------------|
| O3  | 0.042(3)  | 0.062(4)  | 0.045(3) | -0.011(2) | 0.000(2)   | -0.025(3)  |
| O4  | 0.041(3)  | 0.029(3)  | 0.050(3) | 0.004(2)  | 0.001(2)   | -0.011(2)  |
| O5  | 0.061(4)  | 0.030(3)  | 0.068(3) | 0.011(2)  | 0.002(3)   | -0.011(3)  |
| O6  | 0.058(4)  | 0.111(4)  | 0.107(4) | 0.074(3)  | -0.034(3)  | -0.045(3)  |
| O7  | 0.067(4)  | 0.123(5)  | 0.055(3) | -0.022(3) | -0.002(3)  | -0.065(4)  |
| C1  | 0.041(4)  | 0.047(4)  | 0.039(4) | -0.002(3) | -0.009(3)  | -0.030(3)  |
| C2  | 0.057(4)  | 0.033(4)  | 0.052(4) | -0.003(3) | 0.017(4)   | -0.023(4)  |
| C3  | 0.062(5)  | 0.035(5)  | 0.040(4) | 0.012(3)  | 0.002(4)   | -0.023(4)  |
| C4  | 0.044(4)  | 0.025(4)  | 0.045(4) | 0.008(3)  | -0.007(3)  | -0.022(3)  |
| C5  | 0.046(4)  | 0.027(4)  | 0.033(3) | 0.001(3)  | -0.002(3)  | -0.016(3)  |
| C6  | 0.038(4)  | 0.041(4)  | 0.045(4) | 0.012(3)  | -0.001(3)  | -0.013(3)  |
| C7  | 0.031(4)  | 0.041(4)  | 0.040(4) | 0.004(3)  | 0.007(3)   | -0.018(3)  |
| C8  | 0.074(5)  | 0.044(5)  | 0.051(5) | 0.027(4)  | -0.029(4)  | -0.026(4)  |
| C9  | 0.092(5)  | 0.052(5)  | 0.099(6) | 0.008(4)  | -0.041(5)  | -0.011(4)  |
| C10 | 0.141(6)  | 0.071(6)  | 0.072(5) | 0.014(4)  | -0.007(5)  | -0.047(5)  |
| C11 | 0.068(6)  | 0.138(5)  | 0.076(5) | 0.053(5)  | -0.036(4)  | -0.022(5)  |
| C12 | 0.042(5)  | 0.112(6)  | 0.050(5) | 0.021(4)  | -0.018(4)  | -0.040(5)  |
| C13 | 0.032(4)  | 0.040(4)  | 0.050(4) | 0.006(3)  | -0.014(3)  | -0.014(4)  |
| C14 | 0.071(6)  | 0.074(7)  | 0.075(6) | -0.003(5) | -0.034(5)  | -0.029(5)  |
| C15 | 0.077(7)  | 0.106(8)  | 0.077(6) | -0.017(5) | -0.019(5)  | -0.046(6)  |
| C16 | 0.055(6)  | 0.117(8)  | 0.073(6) | 0.006(5)  | -0.021(4)  | -0.042(6)  |
| C17 | 0.077(7)  | 0.167(11) | 0.084(7) | -0.043(7) | 0.028(5)   | -0.051(7)  |
| C18 | 0.122(9)  | 0.169(13) | 0.053(6) | 0.025(6)  | -0.037(6)  | -0.062(9)  |
| C19 | 0.082(7)  | 0.104(8)  | 0.065(6) | 0.017(5)  | -0.008(5)  | -0.061(7)  |
| C20 | 0.083(7)  | 0.053(6)  | 0.080(6) | 0.020(5)  | 0.047(5)   | -0.007(5)  |
| C21 | 0.066(5)  | 0.026(4)  | 0.065(5) | 0.020(3)  | -0.028(4)  | -0.016(4)  |
| C22 | 0.135(11) | 0.058(7)  | 0.079(6) | 0.016(5)  | -0.013(7)  | -0.011(7)  |
| C23 | 0.054(5)  | 0.043(5)  | 0.043(4) | 0.004(3)  | -0.010(4)  | -0.019(4)  |
| C24 | 0.107(9)  | 0.187(13) | 0.183(8) | 0.147(8)  | -0.024(8)  | -0.065(9)  |
| C25 | 0.067(6)  | 0.120(9)  | 0.110(8) | 0.046(7)  | -0.034(6)  | -0.041(6)  |
| C26 | 0.143(8)  | 0.127(6)  | 0.221(8) | 0.079(6)  | -0.078(6)  | -0.102(7)  |
| C27 | 0.28(2)   | 0.139(8)  | 0.32(2)  | 0.087(9)  | -0.110(14) | -0.113(11) |
| C28 | 0.191(12) | 0.121(11) | 0.208(9) | -0.003(8) | -0.064(8)  | -0.105(10) |
| C29 | 0.166(10) | 0.25(2)   | 0.32(2)  | 0.027(14) | -0.098(11) | -0.134(11) |
| C30 | 0.120(9)  | 0.181(12) | 0.111(9) | -0.001(8) | -0.088(8)  | 0.017(8)   |
| C31 | 0.118(11) | 0.23(2)   | 0.093(8) | -0.069(9) | 0.005(7)   | -0.131(12) |

The form of the anisotropic displacement parameter is:

$$ep[-2\pi^2(a^*{}^2U_{11}h^2+b^*{}^2U_{22}k^2+c^*{}^2U_{33}l^2+2b^*c^*U_{23}kl+2a^*c^*U_{13}hl+2a^*b^*U_{12}hk)].$$

**Table 4. Bond Distances in Compound 99085, Å**

| Molecule no. 1 |           |         |           |         |           |
|----------------|-----------|---------|-----------|---------|-----------|
| Si1-O3         | 1.663(5)  | Si1-C14 | 1.854(10) | Si1-C15 | 1.869(9)  |
| Si1-C16        | 1.898(9)  | Si2-O6  | 1.666(5)  | Si2-C24 | 1.856(7)  |
| Si2-C26        | 1.877(8)  | Si2-C25 | 1.882(8)  | O1-C3   | 1.354(8)  |
| O1-C4          | 1.472(8)  | O2-C3   | 1.190(8)  | O3-C1   | 1.437(9)  |
| O4-C5          | 1.430(8)  | O5-C8   | 1.218(9)  | O6-C11  | 1.462(8)  |
| O7-C12         | 1.421(8)  | O7-C31  | 1.436(10) | C1-C13  | 1.543(10) |
| C1-C2          | 1.569(10) | C2-C3   | 1.526(10) | C2-C20  | 1.548(10) |
| C4-C5          | 1.526(10) | C4-C21  | 1.545(10) | C5-C6   | 1.534(10) |
| C5-C23         | 1.540(10) | C6-C7   | 1.334(10) | C7-C8   | 1.469(11) |
| C8-C9          | 1.501(11) | C9-C10  | 1.572(9)  | C10-C11 | 1.531(10) |
| C11-C30        | 1.517(9)  | C11-C12 | 1.577(10) | C12-C13 | 1.518(9)  |
| C16-C18        | 1.558(11) | C16-C17 | 1.569(13) | C16-C19 | 1.566(13) |
| C21-C22        | 1.510(12) | C26-C27 | 1.531(12) | C26-C28 | 1.536(13) |
| C26-C29        | 1.552(12) |         |           |         |           |
| Molecule no. 2 |           |         |           |         |           |
| Si1-O3         | 1.666(5)  | Si1-C14 | 1.873(10) | Si1-C15 | 1.880(8)  |
| Si1-C16        | 1.902(8)  | Si2-O6  | 1.644(5)  | Si2-C24 | 1.849(9)  |
| Si2-C25        | 1.901(10) | Si2-C26 | 1.908(8)  | O1-C3   | 1.370(8)  |
| O1-C4          | 1.469(8)  | O2-C3   | 1.201(8)  | O3-C1   | 1.428(8)  |
| O4-C5          | 1.417(8)  | O5-C8   | 1.222(9)  | O6-C11  | 1.445(8)  |
| O7-C12         | 1.454(8)  | O7-C31  | 1.463(9)  | C1-C13  | 1.536(9)  |
| C1-C2          | 1.553(10) | C2-C3   | 1.526(10) | C2-C20  | 1.523(10) |
| C4-C21         | 1.532(10) | C4-C5   | 1.544(9)  | C5-C6   | 1.537(9)  |
| C5-C23         | 1.547(10) | C6-C7   | 1.319(9)  | C7-C8   | 1.486(10) |
| C8-C9          | 1.488(11) | C9-C10  | 1.547(10) | C10-C11 | 1.546(10) |
| C11-C30        | 1.527(10) | C11-C12 | 1.551(9)  | C12-C13 | 1.526(9)  |
| C16-C18        | 1.522(11) | C16-C19 | 1.547(14) | C16-C17 | 1.567(12) |
| C21-C22        | 1.537(11) | C26-C27 | 1.540(12) | C26-C28 | 1.547(12) |
| C26-C29        | 1.560(12) |         |           |         |           |
| Molecule No. 3 |           |         |           |         |           |
| Si1-O3         | 1.668(6)  | Si1-C16 | 1.764(13) | Si1-C14 | 1.889(13) |
| Si1-C15        | 1.937(10) | Si2-O6  | 1.654(5)  | Si2-C24 | 1.806(11) |
| Si2-C25        | 1.899(10) | Si2-C26 | 1.912(10) | O1-C3   | 1.360(8)  |
| O1-C4          | 1.473(8)  | O2-C3   | 1.212(8)  | O3-C1   | 1.417(9)  |
| O4-C5          | 1.436(8)  | O5-C8   | 1.237(9)  | O6-C11  | 1.433(8)  |
| O7-C12         | 1.429(8)  | O7-C31  | 1.454(11) | C1-C13  | 1.542(10) |
| C1-C2          | 1.566(10) | C2-C3   | 1.512(11) | C2-C20  | 1.516(10) |
| C4-C21         | 1.530(10) | C4-C5   | 1.585(9)  | C5-C6   | 1.504(10) |
| C5-C23         | 1.513(10) | C6-C7   | 1.353(10) | C7-C8   | 1.482(10) |
| C8-C9          | 1.542(11) | C9-C10  | 1.565(9)  | C10-C11 | 1.557(10) |
| C11-C30        | 1.518(10) | C11-C12 | 1.594(10) | C12-C13 | 1.509(9)  |
| C16-C18        | 1.55(2)   | C16-C17 | 1.54(2)   | C16-C19 | 1.70(2)   |
| C21-C22        | 1.497(11) | C26-C29 | 1.474(13) | C26-C28 | 1.523(14) |



|                |           |         |           |         |           |
|----------------|-----------|---------|-----------|---------|-----------|
| C26-C27        | 1.574(14) |         |           |         |           |
| Molecule No. 4 |           |         |           |         |           |
| Si1-O3         | 1.658(6)  | Si1-C16 | 1.815(11) | Si1-C15 | 1.868(10) |
| Si1-C14        | 1.880(9)  | Si2-O6  | 1.633(7)  | Si2-C26 | 1.824(14) |
| Si2-C24        | 1.870(11) | Si2-C25 | 1.897(10) | O1-C3   | 1.351(9)  |
| O1-C4          | 1.472(9)  | O2-C3   | 1.208(9)  | O3-C1   | 1.421(9)  |
| O4-C5          | 1.455(9)  | O5-C8   | 1.222(9)  | O6-C11  | 1.412(12) |
| O7-C31         | 1.426(13) | O7-C12  | 1.444(12) | C1-C2   | 1.529(11) |
| C1-C13         | 1.535(10) | C2-C20  | 1.547(11) | C2-C3   | 1.555(12) |
| C4-C5          | 1.538(9)  | C4-C21  | 1.554(9)  | C5-C6   | 1.515(10) |
| C5-C23         | 1.532(10) | C6-C7   | 1.345(10) | C7-C8   | 1.445(11) |
| C8-C9          | 1.628(12) | C9-C10  | 1.480(12) | C10-C11 | 1.719(13) |
| C11-C30        | 1.559(13) | C11-C12 | 1.582(11) | C12-C13 | 1.539(10) |
| C16-C19        | 1.58(2)   | C16-C18 | 1.637(14) | C16-C17 | 1.65(2)   |
| C21-C22        | 1.423(12) | C26-C29 | 1.53(2)   | C26-C27 | 1.56(2)   |
| C26-C28        | 1.57(2)   |         |           |         |           |

**Table 5. Bond Angles in Compound 99085, °**

| Molecule No. 1 |          |             |          |             |          |
|----------------|----------|-------------|----------|-------------|----------|
| O3-Si1-C14     | 113.8(4) | O3-Si1-C15  | 110.3(4) | C14-Si1-C15 | 109.9(5) |
| O3-Si1-C16     | 104.0(3) | C14-Si1-C16 | 107.5(5) | C15-Si1-C16 | 111.2(5) |
| O6-Si2-C24     | 113.5(3) | O6-Si2-C26  | 103.3(3) | C24-Si2-C26 | 111.2(4) |
| O6-Si2-C25     | 111.0(4) | C24-Si2-C25 | 108.0(4) | C26-Si2-C25 | 109.8(4) |
| C3-O1-C4       | 118.6(5) | C1-O3-Si1   | 126.3(5) | C11-O6-Si2  | 135.5(4) |
| C12-O7-C31     | 115.7(6) | O3-C1-C13   | 109.6(6) | O3-C1-C2    | 107.0(6) |
| C13-C1-C2      | 114.8(5) | C3-C2-C20   | 108.6(6) | C3-C2-C1    | 109.8(6) |
| C20-C2-C1      | 110.0(6) | O2-C3-O1    | 125.1(6) | O2-C3-C2    | 124.5(6) |
| O1-C3-C2       | 110.4(6) | O1-C4-C5    | 108.7(5) | O1-C4-C21   | 108.0(6) |
| C5-C4-C21      | 114.7(6) | O4-C5-C4    | 107.8(5) | O4-C5-C6    | 106.9(5) |
| C4-C5-C6       | 111.3(5) | O4-C5-C23   | 111.9(6) | C4-C5-C23   | 111.6(6) |
| C6-C5-C23      | 107.3(6) | C7-C6-C5    | 124.9(7) | C6-C7-C8    | 124.8(7) |
| O5-C8-C7       | 119.8(7) | O5-C8-C9    | 118.6(7) | C7-C8-C9    | 121.5(7) |
| C8-C9-C10      | 109.9(6) | C11-C10-C9  | 116.6(6) | O6-C11-C30  | 107.9(5) |
| O6-C11-C10     | 108.4(5) | C30-C11-C10 | 112.1(5) | O6-C11-C12  | 103.7(5) |
| C30-C11-C12    | 111.5(6) | C10-C11-C12 | 112.8(6) | O7-C12-C13  | 110.3(6) |
| O7-C12-C11     | 108.3(5) | C13-C12-C11 | 115.0(6) | C12-C13-C1  | 116.6(6) |
| C18-C16-C17    | 110.2(7) | C18-C16-C19 | 110.8(8) | C17-C16-C19 | 109.2(8) |
| C18-C16-Si1    | 107.7(6) | C17-C16-Si1 | 109.9(6) | C19-C16-Si1 | 109.1(6) |
| C22-C21-C4     | 113.7(7) | C27-C26-C28 | 109.3(8) | C27-C26-C29 | 107.5(7) |
| C28-C26-C29    | 108.6(9) | C27-C26-Si2 | 110.6(6) | C28-C26-Si2 | 110.8(6) |
| C29-C26-Si2    | 109.9(6) |             |          |             |          |
| Molecule No. 2 |          |             |          |             |          |
| O3-Si1-C14     | 109.9(3) | O3-Si1-C15  | 110.8(4) | C14-Si1-C15 | 108.9(5) |
| O3-Si1-C16     | 104.5(3) | C14-Si1-C16 | 113.2(4) | C15-Si1-C16 | 109.4(4) |
| O6-Si2-C24     | 112.9(4) | O6-Si2-C25  | 103.4(4) | C24-Si2-C25 | 109.2(6) |
| O6-Si2-C26     | 111.9(3) | C24-Si2-C26 | 111.0(5) | C25-Si2-C26 | 108.0(4) |
| C3-O1-C4       | 117.2(5) | C1-O3-Si1   | 125.4(4) | C11-O6-Si2  | 142.3(4) |
| C12-O7-C31     | 112.9(5) | O3-C1-C13   | 111.2(5) | O3-C1-C2    | 107.2(5) |
| C13-C1-C2      | 113.8(5) | C3-C2-C20   | 107.3(6) | C3-C2-C1    | 110.1(6) |
| C20-C2-C1      | 113.4(6) | O2-C3-O1    | 123.0(6) | O2-C3-C2    | 125.7(6) |
| O1-C3-C2       | 111.3(6) | O1-C4-C21   | 107.2(5) | O1-C4-C5    | 108.0(5) |
| C21-C4-C5      | 115.2(6) | O4-C5-C6    | 108.6(5) | O4-C5-C4    | 109.1(6) |
| C6-C5-C4       | 108.3(5) | O4-C5-C23   | 111.1(5) | C6-C5-C23   | 108.4(5) |
| C4-C5-C23      | 111.2(6) | C7-C6-C5    | 124.8(6) | C6-C7-C8    | 126.5(7) |
| O5-C8-C7       | 119.3(7) | O5-C8-C9    | 120.8(7) | C7-C8-C9    | 119.9(6) |
| C8-C9-C10      | 112.4(6) | C11-C10-C9  | 116.0(6) | O6-C11-C30  | 109.2(6) |
| O6-C11-C10     | 108.3(6) | C30-C11-C10 | 111.2(5) | O6-C11-C12  | 102.6(5) |
| C30-C11-C12    | 110.8(6) | C10-C11-C12 | 114.2(6) | O7-C12-C13  | 110.0(5) |
| O7-C12-C11     | 109.1(5) | C13-C12-C11 | 113.8(6) | C12-C13-C1  | 115.8(6) |
| C18-C16-C19    | 110.3(8) | C18-C16-C17 | 108.2(8) | C19-C16-C17 | 109.5(7) |
| C18-C16-Si1    | 110.3(6) | C19-C16-Si1 | 110.7(6) | C17-C16-Si1 | 107.8(6) |
| C4-C21-C22     | 112.6(7) | C27-C26-C28 | 109.8(7) | C27-C26-C29 | 106.2(7) |

|                |           |             |           |             |           |
|----------------|-----------|-------------|-----------|-------------|-----------|
| C28-C26-C29    | 110.3(7)  | C27-C26-Si2 | 112.3(6)  | C28-C26-Si2 | 109.8(6)  |
| C29-C26-Si2    | 108.2(6)  |             |           |             |           |
| Molecule no. 3 |           |             |           |             |           |
| O3-Si1-C16     | 103.9(4)  | O3-Si1-C14  | 109.7(4)  | C16-Si1-C14 | 110.4(6)  |
| O3-Si1-C15     | 110.1(4)  | C16-Si1-C15 | 115.5(6)  | C14-Si1-C15 | 107.1(6)  |
| O6-Si2-C24     | 113.7(4)  | O6-Si2-C25  | 103.8(4)  | C24-Si2-C25 | 107.1(7)  |
| O6-Si2-C26     | 111.6(4)  | C24-Si2-C26 | 114.7(6)  | C25-Si2-C26 | 104.9(5)  |
| C3-O1-C4       | 117.9(5)  | C1-O3-Si1   | 125.2(5)  | C11-O6-Si2  | 142.4(4)  |
| C12-O7-C31     | 113.8(7)  | O3-C1-C13   | 111.1(6)  | O3-C1-C2    | 108.0(6)  |
| C13-C1-C2      | 116.1(5)  | C3-C2-C20   | 109.2(7)  | C3-C2-C1    | 109.6(6)  |
| C20-C2-C1      | 111.7(6)  | O2-C3-O1    | 123.4(7)  | O2-C3-C2    | 125.4(6)  |
| O1-C3-C2       | 111.2(7)  | O1-C4-C21   | 109.6(6)  | O1-C4-C5    | 104.8(5)  |
| C21-C4-C5      | 114.1(5)  | O4-C5-C6    | 107.9(5)  | O4-C5-C23   | 111.7(5)  |
| C6-C5-C23      | 110.2(6)  | O4-C5-C4    | 108.1(5)  | C6-C5-C4    | 107.2(5)  |
| C23-C5-C4      | 111.6(6)  | C7-C6-C5    | 123.3(6)  | C6-C7-C8    | 124.1(7)  |
| O5-C8-C7       | 119.1(7)  | O5-C8-C9    | 120.0(6)  | C7-C8-C9    | 120.8(6)  |
| C8-C9-C10      | 110.6(6)  | C11-C10-C9  | 113.0(6)  | O6-C11-C30  | 109.3(6)  |
| O6-C11-C10     | 108.5(6)  | C30-C11-C10 | 112.4(5)  | O6-C11-C12  | 102.8(5)  |
| C30-C11-C12    | 109.9(6)  | C10-C11-C12 | 113.4(6)  | O7-C12-C13  | 109.5(6)  |
| O7-C12-C11     | 108.7(5)  | C13-C12-C11 | 112.4(6)  | C12-C13-C1  | 116.6(6)  |
| C18-C16-C17    | 115.8(12) | C18-C16-C19 | 100.6(13) | C17-C16-C19 | 108.9(10) |
| C18-C16-Si1    | 113.1(9)  | C17-C16-Si1 | 112.0(9)  | C19-C16-Si1 | 105.1(8)  |
| C22-C21-C4     | 113.2(7)  | C29-C26-C28 | 111.6(8)  | C29-C26-C27 | 105.3(9)  |
| C28-C26-C27    | 109.4(10) | C29-C26-Si2 | 111.9(7)  | C28-C26-Si2 | 109.4(7)  |
| C27-C26-Si2    | 109.1(7)  |             |           |             |           |
| Molecule No. 4 |           |             |           |             |           |
| O3-Si1-C16     | 106.5(5)  | O3-Si1-C15  | 111.7(4)  | C16-Si1-C15 | 109.5(5)  |
| O3-Si1-C14     | 110.2(4)  | C16-Si1-C14 | 109.7(5)  | C15-Si1-C14 | 109.2(5)  |
| O6-Si2-C26     | 102.8(6)  | O6-Si2-C24  | 112.4(6)  | C26-Si2-C24 | 111.3(8)  |
| O6-Si2-C25     | 111.3(5)  | C26-Si2-C25 | 112.2(7)  | C24-Si2-C25 | 106.9(6)  |
| C3-O1-C4       | 118.0(6)  | C1-O3-Si1   | 130.0(5)  | C11-O6-Si2  | 132.3(6)  |
| C31-O7-C12     | 117.5(8)  | O3-C1-C2    | 109.3(6)  | O3-C1-C13   | 111.5(6)  |
| C2-C1-C13      | 117.1(6)  | C1-C2-C20   | 112.1(6)  | C1-C2-C3    | 110.2(6)  |
| C20-C2-C3      | 107.3(7)  | O2-C3-O1    | 125.8(7)  | O2-C3-C2    | 123.8(7)  |
| O1-C3-C2       | 110.4(7)  | O1-C4-C5    | 106.2(5)  | O1-C4-C21   | 107.9(6)  |
| C5-C4-C21      | 115.5(6)  | O4-C5-C6    | 105.8(6)  | O4-C5-C23   | 112.2(6)  |
| C6-C5-C23      | 107.8(6)  | O4-C5-C4    | 108.4(5)  | C6-C5-C4    | 109.2(6)  |
| C23-C5-C4      | 113.2(6)  | C7-C6-C5    | 127.9(7)  | C6-C7-C8    | 124.8(7)  |
| O5-C8-C7       | 120.3(8)  | O5-C8-C9    | 120.9(7)  | C7-C8-C9    | 115.7(7)  |
| C10-C9-C8      | 101.1(8)  | C9-C10-C11  | 101.9(9)  | O6-C11-C30  | 109.3(9)  |
| O6-C11-C12     | 106.6(8)  | C30-C11-C12 | 106.2(9)  | O6-C11-C10  | 94.5(8)   |
| C30-C11-C10    | 126.1(9)  | C12-C11-C10 | 112.3(7)  | O7-C12-C13  | 108.8(7)  |
| O7-C12-C11     | 110.0(7)  | C13-C12-C11 | 113.5(8)  | C12-C13-C1  | 115.3(6)  |
| C19-C16-C18    | 105.8(10) | C19-C16-C17 | 106.9(8)  | C18-C16-C17 | 109.3(8)  |
| C19-C16-Si1    | 113.5(7)  | C18-C16-Si1 | 110.9(7)  | C17-C16-Si1 | 110.1(8)  |
| C22-C21-C4     | 117.5(7)  | C29-C26-C27 | 107(2)    | C29-C26-C28 | 111.2(14) |

|             |          |             |           |             |           |
|-------------|----------|-------------|-----------|-------------|-----------|
| C27-C26-C28 | 103(2)   | C29-C26-Si2 | 114.8(14) | C27-C26-Si2 | 111.2(12) |
| C28-C26-Si2 | 109.1(8) |             |           |             |           |

## References

- <sup>1</sup> Velvadapu, V.; Paul, T.; Wagh, B.; Klepacki, D.; Guvench, O.; MacKerell, A.; Andrade, R. B. *ACS Med. Chem. Lett.* **2010**, *2*, 68.
- <sup>2</sup> Grant, Eugene, B. III., WO 2006047167 A2, May 4, 2006.
- <sup>3</sup> Woodward, R. B. et al. *J. Am. Chem. Soc.* **1981**, *103*, 3215–3217; (b) Velvadapu, V.; Andrade, R. B. *Carb. Res.* **2008**, *343*, 145.
- <sup>4</sup> (a) Martin, S. F.; Lee, W.-C.; Pacofsky, G. J.; Gist, R. P.; Mulhern, T. A. *J. Am. Chem. Soc.* **1994**, *116*, 4674. (b) Oh, H. S.; Xuan, R.; Kang, H.-Y. *Org. Biomol. Chem.* **2009**, *7*, 4458. (c) Velvadapu, V.; Paul, T.; Wagh, B.; Klepacki, D.; Guvench, O.; MacKerell, A.; Andrade, R. B. *ACS Med. Chem. Lett.* **2010**, *2*, 68.
- <sup>5</sup> Cossy, J.; Bauer, D.; Bellosta, V. *Tetrahedron.* **2002**, *58*, 5909. (b) Yadav, J. S.; Pratap, T. V.; Rajender, V. *J. Org. Chem.* **2007**, *72*, 5882.
- <sup>6</sup> Still, W. C.; Kahn, M.; Mitra, A. *J. Org. Chem.* **1978**, *43*, 2923.
- <sup>7</sup> CrystalClear: Rigaku Corporation, 1999.
- <sup>8</sup> CrystalStructure: Crystal Structure Analysis Package, Rigaku Corp. Rigaku/MS (2002).
- <sup>9</sup> REQAB4: R.A. Jacobsen, (1994). Private Communication.
- <sup>10</sup> SIR2004: Burla, M.C., R. Caliendo, M. Camali, B. Carrozzini, G.L. Cascarano, L. DeCaro, C. Giacovazzo, G. Polidori & R. Spagna (2005). *J. Appl. Cryst.*, **38**, 381-388.
- <sup>11</sup> SHELXL-97: Sheldrick, G.M. (2008) *Acta Cryst.*, **A64**, 112-122.
- <sup>12</sup>  $R_1 = \sum ||F_o| - |F_c|| / \sum |F_o|$
- $$wR_2 = \left\{ \sum w (F_o^2 - F_c^2)^2 / \sum w(F_o^2)^2 \right\}^{1/2}$$
- $$\text{GOF} = \left\{ \sum w (F_o^2 - F_c^2)^2 / (n - p) \right\}^{1/2}$$
- where n = the number of reflections and p = the number of parameters refined.
- <sup>13</sup> "ORTEP-II: A Fortran Thermal Ellipsoid Plot Program for Crystal Structure Illustrations". C.K. Johnson (1976) ORNL-5138.
